# Supplementary material for: Rhodium-catalyzed synthesis of substituted isoquinolones via a selective decarbonylation/alkyne insertion cascade of phthalimides
Source: Royal Society of Chemistry journal article supplement (doi:10.1039/d0ob01793k), 2020-01-01

## *Supporting Information*

### **Rhodium-catalyzed synthesis of substituted isoquinolones *via* selective decarbonylation/alkyne insertion cascade of phthalimides**

Fen Xu,<sup>\*,a</sup> Wen-Jing Zhu,<sup>a</sup> Juan Wang<sup>b</sup>, Qi Ma,<sup>a</sup> Li-Jing Shen<sup>a</sup>

<sup>a</sup> Department of Material and Chemical Engineering, Zhengzhou University of Light Industry, Zhengzhou 450002, P. R. China.

<sup>b</sup> Henan Ecological and Environmental Monitoring Center, Zhengzhou 450002, P. R. China.

\*E-mail: fenxu\_zzuli@163.com

## Contents

|                                                                                     |                |
|-------------------------------------------------------------------------------------|----------------|
| <b>1. General Information</b> .....                                                 | <b>S2</b>      |
| <b>2. General Procedure</b> .....                                                   | <b>S2</b>      |
| <b>3. Characterization of Phthalimides and Products</b> .....                       | <b>S3–S9</b>   |
| <b>4. References</b> .....                                                          | <b>S10</b>     |
| <b>5. Single-Crystal X-Ray Crystallography</b> .....                                | <b>S11–S12</b> |
| <b>6. Copy of NMR (<sup>1</sup>H, <sup>13</sup>C, <sup>19</sup>F) Spectra</b> ..... | <b>S13–S66</b> |

## 1. General Information

Unless otherwise noted, all the reactions were carried out in a glassware under an air atmosphere. The commercially available chemicals and solvents were used as received without further purification. Phthalimides were prepared according to the published procedure.<sup>S1-S5</sup> The reactions were monitored by TLC using UV-light or by staining with iodine. Column chromatography was performed on silica gel (200-300 mesh). Single-crystal X-ray data in this work were collected on an Agilent Technologies SuperNova Single Crystal Diffractometer at different temperatures equipped with graphite-monochromatic Mo K $\alpha$  or Cu K $\alpha$  radiation ( $\lambda = 0.71073 \text{ \AA}$  or  $1.54184 \text{ \AA}$ ). The structures were solved by SHELXS (direct methods) and refined by SHELXL (full matrix least-squares techniques) in the Olex2 package.<sup>S6</sup> All non-hydrogen atoms were refined with anisotropic displacement parameters. Hydrogen atoms attached to carbon were placed in geometrically idealized positions and refined using a riding model. <sup>1</sup>H, <sup>13</sup>C, and <sup>19</sup>F NMR were recorded on a 400 MHz Bruker NMR spectrometer in CDCl<sub>3</sub> (7.26 ppm for <sup>1</sup>H and 77.16 ppm for <sup>13</sup>C) using tetramethylsilane (TMS) as the internal standard(s = singlet, d = doublet, t = triplet, q = quartet, dd = doublet of doublets, m = multiplet).

## 2. General Procedure

A mixture of Rh(PPh<sub>3</sub>)<sub>2</sub>(CO)Cl (5 mol%), 2-(quinolin-8-yl)isoindoline-1,3-dione **1a** (0.125 mmol), 1,2-diphenylethyne **2a** (1.3 equiv), PhCl (2 mL) was reflux for 24 h. After cooling the reaction to room temperature, the solvent was removed under vacuum and the residue was purified by silica gel chromatography using petroleum ether/ethyl acetate = 10:1-4:1 to afford desired products **3aa-3ia** and **3aa-3am**.

### 3. Characterization of Phthalimides and Products

**4-methyl-2-(quinolin-8-yl)isoindoline-1,3-dione (1c).** white solid, mp 109.5-111.3°C. <sup>1</sup>H NMR (400 MHz, CDCl<sub>3</sub>) δ = 8.87 (dd, *J*=4.2, 1.7, 1H), 8.23 (dd, *J*=8.3, 1.7, 1H), 7.96 (dd, *J*=8.2, 1.5, 1H), 7.83 (d, *J*=7.3, 1H), 7.74 (dd, *J*=7.3, 1.5, 1H), 7.70 – 7.62 (m, 2H), 7.55 (d, *J*=7.7, 1H), 7.44 (dd, *J*=8.3, 4.2, 1H), 2.76 (s, 3H). <sup>13</sup>C NMR (101 MHz, CDCl<sub>3</sub>) δ = 168.7, 168.0, 151.0, 144.5, 138.6, 136.6, 136.2, 133.7, 132.9, 130.3, 130.0, 129.5, 129.3, 129.2, 126.2, 121.9, 121.5, 17.8.

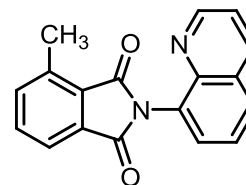

**3,4-diphenyl-2-(quinolin-8-yl)isoquinolin-1(2H)-one (3aa).** white solid (93 %), mp 123.9-125.8°C. <sup>1</sup>H NMR (400 MHz, CDCl<sub>3</sub>) δ 8.93 (dd, *J* = 4.2, 1.6 Hz, 1H), 8.58 (dd, *J* = 7.9, 1.1 Hz, 1H), 8.05 (dd, *J* = 8.3, 1.5 Hz, 1H), 7.65 (dd, *J* = 8.2, 1.2 Hz, 1H), 7.63 – 7.56 (m, 1H), 7.56 – 7.46 (m, 2H), 7.41 – 7.33 (m, 2H), 7.31 (d, *J* = 8.0 Hz, 1H), 7.27 – 7.10 (m, 5H), 6.97 (d, *J* = 7.7 Hz, 1H), 6.82 (t, *J* = 7.2 Hz, 1H), 6.78 – 6.67 (m, 2H), 6.49 (dd, *J* = 11.0, 4.1 Hz, 1H). <sup>13</sup>C NMR (101 MHz, CDCl<sub>3</sub>) δ = 162.7, 150.7, 144.7, 141.8, 138.1, 137.7, 136.6, 136.0, 134.9, 132.4, 131.8, 131.7, 130.9, 130.8, 129.8, 128.7, 128.5, 128.4, 128.0, 127.8, 127.2, 126.7, 126.64, 126.62, 126.4, 125.8, 125.6, 125.6, 121.5, 118.5.

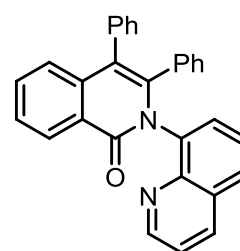

**8-fluoro-3,4-diphenyl-2-(quinolin-8-yl)isoquinolin-1(2H)-one (3ba).** white solid (88 %), mp 164.5-165.9°C. <sup>1</sup>H NMR (400 MHz, CDCl<sub>3</sub>) δ = 8.92 (dd, *J*=4.2, 1.7, 1H), 8.43 (dd, *J*=8.0, 0.9, 1H), 8.03 (dd, *J*=8.3, 1.6, 1H), 7.64 (dd, *J*=8.2, 1.2, 1H), 7.47 (ddd, *J*=11.4, 6.0, 3.0, 2H), 7.41 – 7.32 (m, 2H), 7.28 (ddd, *J*=12.2, 7.9, 1.3, 1H), 7.20 (ddd, *J*=8.3, 6.3, 4.6, 2H), 7.16 – 7.11 (m, 1H), 7.11 – 7.04 (m, 2H), 6.93 (d, *J*=7.6, 1H), 6.85 – 6.77 (m, 1H), 6.72 – 6.65 (m, 2H), 6.49 – 6.41 (m, 1H). <sup>13</sup>C NMR (101 MHz, CDCl<sub>3</sub>) δ = 161.67 (d, *J* = 3.1 Hz), 158.53 (d, *J* = 255.0 Hz), 150.8, 144.4, 143.2, 138.42 (d, *J* = 3.4 Hz), 137.4, 136.0, 134.4, 130.84 (dd, *J* = 13.5, 3.2 Hz), 130.8, 129.8, 128.71, 128.68, 127.80 (d, *J* = 2.5 Hz), 127.3, 127.2, 127.1, 126.75 (d, *J* = 9.0 Hz), 126.41 (d, *J* = 18.9 Hz), 126.3, 125.7, 124.61 (d, *J* = 3.9 Hz), 121.5, 119.45 (d, *J* = 22.3 Hz) 114.3.

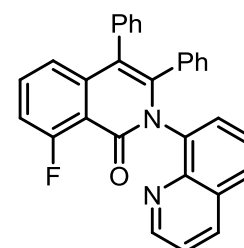

**8-methyl-3,4-diphenyl-2-(quinolin-8-yl)isoquinolin-1(2H)-one (3ca).** white solid (51%), mp 161.2-162.7°C. <sup>1</sup>H NMR (400 MHz, CDCl<sub>3</sub>) δ = 8.91 (dd, *J*=4.2, 1.7, 1H), 8.56 (dd, *J*=5.8, 3.8, 1H), 8.02 (dd, *J*=8.3, 1.7, 1H), 7.62 (dd, *J*=8.2, 1.3, 1H), 7.47 (dd, *J*=7.3, 1.3, 1H), 7.44 – 7.39 (m, 2H), 7.37 – 7.31 (m, 2H), 7.21 – 7.13 (m, 2H), 7.12 – 7.00 (m, 3H), 6.90 (d, *J*=7.7, 1H), 6.78 (t, *J*=7.3, 1H), 6.69 – 6.59 (m, 2H), 6.42 (td, *J*=7.6, 0.8, 1H), 1.82 (s, 3H). <sup>13</sup>C NMR (101 MHz, CDCl<sub>3</sub>) δ = 162.9, 150.7, 144.6, 142.5, 140.0, 137.8, 136.8, 136.0, 135.9, 135.3, 135.2, 132.3, 132.2, 131.1, 130.9, 130.0, 128.7, 128.5, 127.4, 127.3, 127.0, 126.9, 126.6, 126.5, 126.3, 126.1, 125.7, 121.5, 118.2, 112.0, 23.9.

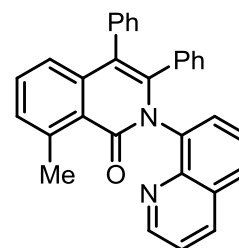

**8-chloro-3,4-diphenyl-2-(quinolin-8-yl)isoquinolin-1(2H)-one (3da).** white solid (42%), mp 164.4-166.1°C. <sup>1</sup>H NMR (400 MHz, CDCl<sub>3</sub>) δ =

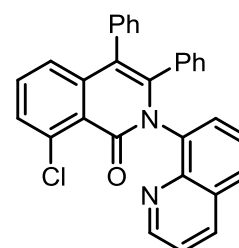

8.92 (dd,  $J=4.2, 1.7$ , 1H), 8.61 (dd,  $J=8.0, 1.5$ , 1H), 8.04 (dd,  $J=8.3, 1.7$ , 1H), 7.66 (ddd,  $J=14.1, 8.0, 1.4$ , 2H), 7.50 – 7.40 (m, 2H), 7.40 – 7.31 (m, 2H), 7.15 (dt,  $J=7.4, 3.3$ , 2H), 7.11 – 6.98 (m, 3H), 6.91 (d,  $J=7.7$ , 1H), 6.80 (dd,  $J=11.0, 4.1$ , 1H), 6.67 (tdd,  $J=3.6, 2.2, 1.2$ , 2H), 6.46 – 6.38 (m, 1H).  $^{13}\text{C}$  NMR (101 MHz,  $\text{CDCl}_3$ )  $\delta = 162., 150.8, 144.4, 144.1, 138.3, 137.4, 136.3, 136.0, 134.7, 134.3, 132.3, 132.2, 131.1, 130.9, 130.8, 129.8, 128.7, 128.7, 128.4, 128.1, 127.2, 127.1, 127.0, 127.0, 126.44, 126.40, 126.2, 125.7, 121.6, 116.6$ .

**6-chloro-3,4-diphenyl-2-(quinolin-8-yl)isoquinolin-1(2H)-one (3ea).**

white solid (49%), mp 175.0-176.9°C.  $^1\text{H}$  NMR (400 MHz,  $\text{CDCl}_3$ )  $\delta = 8.92$  (dd,  $J=4.2, 1.7$ , 1H), 8.50 (d,  $J=8.6$ , 1H), 8.05 (dd,  $J=8.3, 1.6$ , 1H), 7.66 (dd,  $J=8.2, 1.2$ , 1H), 7.52 – 7.42 (m, 2H), 7.40 – 7.31 (m, 2H), 7.31 – 7.12 (m, 6H), 6.95 (d,  $J=7.8$ , 1H), 6.83 (td,  $J=7.7, 1.2$ , 1H), 6.78 – 6.67 (m, 2H), 6.49 (dd,  $J=11.3, 3.9$ , 1H).  $^{13}\text{C}$  NMR (101 MHz,  $\text{CDCl}_3$ )  $\delta = 162.2, 150.8, 144.6, 143.4, 139.5, 139.2, 137.4, 136.0, 135.8, 134.6, 131.7, 131.5, 130.8, 130.6, 130.3, 129.6, 128.8, 128.7, 128.2, 128.0, 127.4, 127.2, 127.1, 126.7, 126.5, 125.7, 125.0, 124.0, 121.6, 117.7$ .

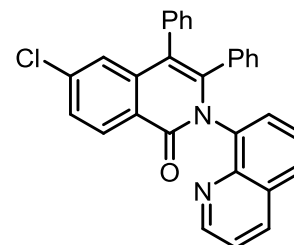

**7-chloro-3,4-diphenyl-2-(quinolin-8-yl)isoquinolin-1(2H)-one (3ea').**

white solid (41%), mp 121.5-123.3°C.  $^1\text{H}$  NMR (400 MHz,  $\text{CDCl}_3$ )  $\delta = 8.92$  (dd,  $J=4.2, 1.7$ , 1H), 8.54 (d,  $J=2.3$ , 1H), 8.06 (dd,  $J=8.3, 1.7$ , 1H), 7.67 (dd,  $J=8.2, 1.3$ , 1H), 7.53 (dd,  $J=8.7, 2.3$ , 1H), 7.48 (dd,  $J=7.3, 1.3$ , 1H), 7.42 – 7.33 (m, 2H), 7.27 – 7.19 (m, 3H), 7.19 – 7.12 (m, 3H), 6.96 (d,  $J=7.7$ , 1H), 6.83 (t,  $J=7.5$ , 1H), 6.77 – 6.66 (m, 2H), 6.49 (dd,  $J=11.1, 4.1$ , 1H).  $^{13}\text{C}$  NMR (101 MHz,  $\text{CDCl}_3$ )  $\delta = 161.7, 150.8, 144.6, 142.2, 137.4, 136.6, 136.1, 136.0, 134.6, 132.8, 132.7, 131.8, 131.5, 130.8, 130.7, 129.7, 128.8, 128.7, 128.1, 127.9, 127.8, 127.4, 127.4, 127.0, 126.7, 126.7, 126.5, 125.8, 121.6, 118.1$ .

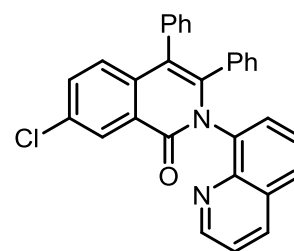

**6,7-dichloro-3,4-diphenyl-2-(quinolin-8-yl)isoquinolin-1(2H)-one (3fa).**

white solid (32%), mp 154.7-156.4°C.  $^1\text{H}$  NMR (400 MHz,  $\text{CDCl}_3$ )  $\delta = 8.92$  (dd,  $J=4.2, 1.7$ , 1H), 8.63 (s, 1H), 8.06 (dd,  $J=8.3, 1.6$ , 1H), 7.67 (dd,  $J=8.2, 1.3$ , 1H), 7.47 (dd,  $J=7.3, 1.3$ , 1H), 7.42 – 7.34 (m, 3H), 7.29 – 7.22 (m, 1H), 7.22 – 7.09 (m, 4H), 6.95 (d,  $J=7.7$ , 1H), 6.84 (td,  $J=7.6, 0.7$ , 1H), 6.72 (ddd,  $J=21.7, 10.9, 4.5$ , 2H), 6.53 – 6.44 (m, 1H).  $^{13}\text{C}$  NMR (101 MHz,  $\text{CDCl}_3$ )  $\delta = 161.2, 150.9, 144.5, 143.6, 137.7, 137.4, 137.2, 136.1, 135.5, 134.4, 131.7, 131.4, 131.1, 130.7, 130.5, 130.1, 129.5, 128.8, 128.8, 128.3, 128.1, 127.5, 127.2, 127.2, 126.8, 126.5, 125.7, 125.0, 121.6, 117.2$ .

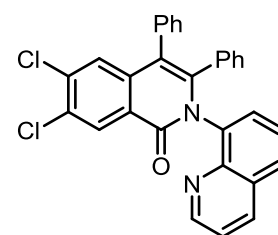

**6-methyl-3,4-diphenyl-2-(quinolin-8-yl)isoquinolin-1(2H)-one (3ga').**

white solid (46 %), mp 155.6-157.5°C.  $^1\text{H}$  NMR (400 MHz,  $\text{CDCl}_3$ )  $\delta = 8.92$  (dd,  $J=4.2, 1.7$ , 1H), 8.47 (d,  $J=8.2$ , 1H), 8.04 (dd,  $J=8.3, 1.7$ , 1H), 7.65 (dd,  $J=8.2, 1.3$ , 1H), 7.49 (dd,  $J=7.3, 1.3$ , 1H), 7.40 – 7.31 (m, 3H), 7.29 – 7.20 (m, 3H), 7.21 – 7.10 (m, 3H), 6.95 (d,  $J=7.7$ , 1H), 6.82 (t,  $J=7.2$ , 1H), 6.76 – 6.66 (m, 2H), 6.47 (td,  $J=7.6, 0.8$ , 1H), 2.39 (s, 3H).  $^{13}\text{C}$  NMR (101 MHz,  $\text{CDCl}_3$ )  $\delta = 162.7, 150.7, 144.8, 143.0, 141.9, 138.2, 137.8, 136.7, 135.9, 135.0, 131.9, 131.7, 130.9, 130.8, 129.8, 128.7, 128.5, 128.3, 128.0, 127.7, 127.1, 126.7, 126.6, 126.4, 125.7, 125.3, 123.4, 121.4, 118.4, 22.1$ .

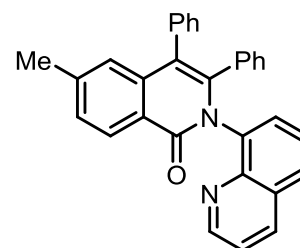

**7-methyl-3,4-diphenyl-2-(quinolin-8-yl)isoquinolin-1(2H)-one (3ga).**

white solid (50%), mp 160.7-162.5°C. <sup>1</sup>H NMR (400 MHz, CDCl<sub>3</sub>) δ = 8.92 (dd, *J*=4.2, 1.7, 1H), 8.38 (s, 1H), 8.05 (dd, *J*=8.3, 1.7, 1H), 7.65 (dd, *J*=8.2, 1.2, 1H), 7.48 (dd, *J*=7.3, 1.3, 1H), 7.42 (dd, *J*=8.3, 1.7, 1H), 7.39 – 7.32 (m, 2H), 7.25 – 7.18 (m, 3H), 7.18 – 7.10 (m, 3H), 6.96 (d, *J*=7.7, 1H), 6.82 (t, *J*=7.5, 1H), 6.71 (td, *J*=7.6, 1.1, 2H), 6.48 (dt, *J*=7.6, 3.8, 1H), 2.50 (s, 3H). <sup>13</sup>C NMR (101 MHz, CDCl<sub>3</sub>) δ = 162.7, 150.7, 144.8, 140.9, 137.9, 136.8, 136.7, 136.0, 135.9, 135.0, 133.9, 131.9, 131.7, 130.9, 129.9, 128.7, 128.5, 128.0, 128.0, 127.7, 127.1, 126.7, 126.6, 126.4, 125.7, 125.6, 125.5, 121.4, 118.5, 21.4.

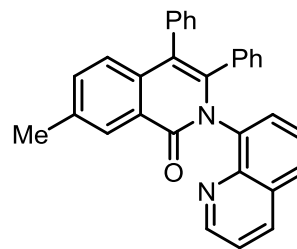**7-fluoro-3,4-diphenyl-2-(quinolin-8-yl)isoquinolin-1(2H)-one (3ha).**

white solid (44%), mp 119.5-121.2°C. <sup>1</sup>H NMR (400 MHz, CDCl<sub>3</sub>) δ = 8.93 (dd, *J* = 4.2, 1.6 Hz, 1H), 8.29 – 8.14 (m, 1H), 8.06 (dd, *J* = 8.3, 1.4 Hz, 1H), 7.67 (dd, *J* = 8.2, 1.2 Hz, 1H), 7.49 (dd, *J* = 7.3, 1.2 Hz, 1H), 7.41 – 7.28 (m, 4H), 7.25 – 7.20 (m, 2H), 7.19 – 7.08 (m, 3H), 6.96 (d, *J* = 7.6 Hz, 1H), 6.82 (dd, *J* = 11.7, 4.2 Hz, 1H), 6.78 – 6.67 (m, 2H), 6.48 (dd, *J* = 11.0, 4.2 Hz, 1H). <sup>13</sup>C NMR (101 MHz, CDCl<sub>3</sub>) δ = 161.87 (d, *J* = 3.5 Hz), 161.50 (d, *J* = 247.4 Hz), 150.8, 144.5, 141.1, 137.4, 136.3, 136.1, 134.79 (d, *J* = 2.1 Hz), 134.6, 131.64 (d, *J* = 21.3 Hz), 130.8, 129.8, 128.74, 128.68, 128.23 (d, *J* = 7.7 Hz), 127.99 (d, *J* = 24.5 Hz), 127.3, 127.18 (d, *J* = 8.1 Hz), 126.9, 126.57 (d, *J* = 22.7 Hz), 125.8, 121.5, 121.00 (d, *J* = 23.3 Hz), 118.1, 113.39 (d, *J* = 22.8 Hz). <sup>19</sup>F NMR (376 MHz, CDCl<sub>3</sub>) δ = -113.79.

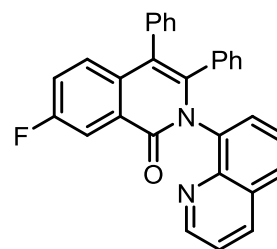**6-fluoro-3,4-diphenyl-2-(quinolin-8-yl)isoquinolin-1(2H)-one (3ha').**

white solid (37%), mp 170.2-171.9°C. <sup>1</sup>H NMR (400 MHz, CDCl<sub>3</sub>) δ = 8.94 (dd, *J* = 4.2, 1.7 Hz, 1H), 8.58 (dd, *J* = 8.9, 6.0 Hz, 1H), 8.06 (dd, *J* = 8.3, 1.6 Hz, 1H), 7.67 (dd, *J* = 8.2, 1.3 Hz, 1H), 7.49 (dd, *J* = 7.3, 1.3 Hz, 1H), 7.41 – 7.33 (m, 2H), 7.26 – 7.10 (m, 6H), 6.99 – 6.89 (m, 2H), 6.83 (dd, *J* = 11.8, 4.3 Hz, 1H), 6.73 (td, *J* = 7.4, 1.3 Hz, 2H), 6.53 – 6.44 (m, 1H). <sup>13</sup>C NMR (101 MHz, CDCl<sub>3</sub>) δ = 165.59 (d, *J* = 251.7 Hz), 162.0, 150.8, 144.6, 143.2, 140.68 (d, *J* = 10.1 Hz), 137.4, 136.1, 136.0, 134.6, 131.67 (d, *J* = 10.0 Hz), 131.58 (d, *J* = 22.5 Hz), 131.58 (d, *J* = 22.5 Hz), 130.9, 130.6, 129.6, 128.7, 128.7, 128.08 (d, *J* = 22.7 Hz), 127.19 (d, *J* = 35.2 Hz), 126.58 (d, *J* = 22.5 Hz), 125.8, 122.2, 121.5, 118.04 (d, *J* = 3.2 Hz), 115.19 (d, *J* = 23.5 Hz), 110.82 (d, *J* = 23.2 Hz).

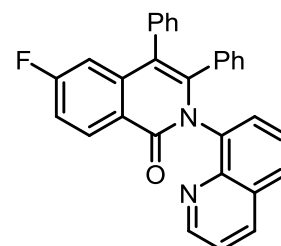**6,7-difluoro-3,4-diphenyl-2-(quinolin-8-yl)isoquinolin-1(2H)-one (3ia)**

white solid (24%), mp 105.9-107.8°C. <sup>1</sup>H NMR (400 MHz, CDCl<sub>3</sub>) δ = 8.93 (dd, *J*=4.2, 1.7, 1H), 8.33 (dd, *J*=10.7, 8.3, 1H), 8.07 (dd, *J*=8.3, 1.6, 1H), 7.67 (dd, *J*=8.2, 1.3, 1H), 7.48 (dd, *J*=7.3, 1.4, 1H), 7.44 – 7.35 (m, 2H), 7.29 – 7.22 (m, 1H), 7.22 – 7.12 (m, 4H), 7.06 (dd, *J*=11.7, 7.5, 1H), 6.95 (d, *J*=7.7, 1H), 6.84 (t, *J*=7.2, 1H), 6.77 – 6.68 (m, 2H), 6.52 – 6.43 (m, 1H). <sup>19</sup>F NMR (376 MHz, CDCl<sub>3</sub>) δ -129.40 (d, *J* = 22.0 Hz), -137.59 (d, *J* = 22.0 Hz). <sup>13</sup>C NMR (101 MHz, CDCl<sub>3</sub>) δ = 161.28 (d, *J* = 3.7 Hz), 153.96 (dd, *J* = 255.1, 14.1 Hz), 150.84, 149.84 (dd, *J* = 250.9, 14.2 Hz), 144.49, 142.68 (d, *J* = 2.2 Hz), 137.26, 136.27 (d, *J* = 2.7 Hz), 136.19 (d, *J* = 2.5 Hz), 136.11, 135.87, 134.43, 131.49 (d, *J* = 25.2 Hz), 130.76, 130.11 (d, *J* = 99.2 Hz), 128.80, 128.78, 128.20 (d, *J* = 21.7 Hz), 127.34 (d, *J* = 26.3 Hz), 126.64 (d, *J* = 23.0 Hz),

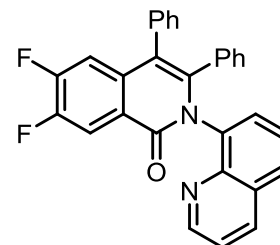

125.76, 122.64 (dd,  $J = 6.2, 2.0$  Hz), 121.61, 117.58, 116.46 (dd,  $J = 18.7, 1.9$  Hz), 113.48 (d,  $J = 19.2$  Hz).

**2-(quinolin-8-yl)-3,4-di-p-tolyloisoquinolin-1(2H)-one (3ab).** white solid (95 %), mp 173.1-174.9°C.  $^1\text{H}$  NMR (400 MHz,  $\text{CDCl}_3$ )  $\delta = 8.91$  (dd,  $J=4.2, 1.7, 1\text{H}$ ), 8.56 (dd,  $J=7.9, 1.1, 1\text{H}$ ), 7.63 (dd,  $J=8.2, 1.3, 1\text{H}$ ), 7.60 – 7.53 (m, 1H), 7.52 – 7.42 (m, 2H), 7.39 – 7.27 (m, 3H), 7.13 (dd,  $J=7.9, 1.6, 1\text{H}$ ), 7.04 (dd,  $J=7.9, 1.7, 2\text{H}$ ), 6.96 (d,  $J=8.0, 1\text{H}$ ), 6.84 (dd,  $J=7.8, 1.7, 1\text{H}$ ), 6.66 – 6.57 (m, 2H), 6.27 (d,  $J=8.0, 1\text{H}$ ), 2.25 (s, 3H), 1.92 (s, 3H).  $^{13}\text{C}$  NMR (101 MHz,  $\text{CDCl}_3$ )  $\delta = 162.8, 150.7, 144.8, 142.0, 138.5, 137.9, 136.7, 136.1, 136.0, 133.7, 132.3, 132.1, 131.7, 131.5, 130.8, 130.7, 129.6, 128.8, 128.7, 128.5, 128.4, 128.3, 127.4, 127.2, 126.5, 125.8, 125.7, 125.6, 121.4, 118.5, 21.2, 21.0$ .

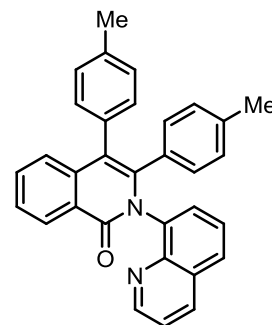

**3,4-bis(4-ethylphenyl)-2-(quinolin-8-yl)isoquinolin-1(2H)-one (3ac).** white solid (97%), mp 143.9-145.7°C.  $^1\text{H}$  NMR (400 MHz,  $\text{CDCl}_3$ )  $\delta = 8.93$  (dd,  $J = 4.2, 1.7$  Hz, 1H), 8.57 (dd,  $J = 8.0, 1.1$  Hz, 1H), 8.05 (dd,  $J = 8.3, 1.4$  Hz, 1H), 7.69 – 7.54 (m, 2H), 7.54 – 7.42 (m, 2H), 7.40 – 7.29 (m, 3H), 7.15 (dd,  $J = 7.8, 1.7$  Hz, 1H), 7.09 – 7.01 (m, 2H), 6.98 (dd,  $J = 7.9, 1.5$  Hz, 1H), 6.84 (dd,  $J = 7.8, 1.7$  Hz, 1H), 6.63 (td,  $J = 7.8, 1.3$  Hz, 2H), 6.29 (dd,  $J = 7.9, 1.4$  Hz, 1H), 2.56 (q,  $J = 7.6$  Hz, 2H), 2.23 (q,  $J = 7.6$  Hz, 2H), 1.17 (t,  $J = 7.6$  Hz, 3H), 0.88 (dd,  $J = 9.1, 6.0$  Hz, 3H).  $^{13}\text{C}$  NMR (101 MHz,  $\text{CDCl}_3$ )  $\delta = 162.8, 150.6, 144.7, 142.9, 142.4, 142.0, 138.4, 137.9, 136.0, 133.8, 132.3, 131.7, 131.5, 130.8, 130.7, 129.7, 128.7, 128.3, 127.4, 127.1, 126.4, 126.0, 125.8, 125.8, 125.7, 125.5, 121.4, 118.5, 28.5, 28.2, 15.4, 15.0$ .

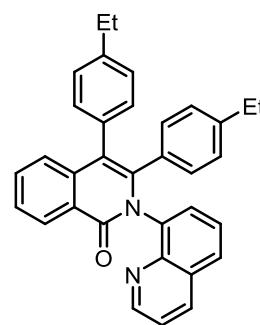

**3,4-bis(4-fluorophenyl)-2-(quinolin-8-yl)isoquinolin-1(2H)-one (3ad).** white solid (89 %), mp 152.5-154.2°C.  $^1\text{H}$  NMR (400 MHz,  $\text{CDCl}_3$ )  $\delta = 8.91$  (dd,  $J = 4.2, 1.6$  Hz, 1H), 8.58 (dd,  $J = 8.0, 1.1$  Hz, 1H), 8.09 (d,  $J = 8.2$  Hz, 1H), 7.71 (dd,  $J = 8.2, 1.2$  Hz, 1H), 7.66 – 7.58 (m, 1H), 7.53 (ddd,  $J = 15.1, 7.9, 1.2$  Hz, 2H), 7.45 – 7.33 (m, 2H), 7.27 (d,  $J = 6.7$  Hz, 1H), 7.20 – 7.11 (m, 2H), 6.99 – 6.84 (m, 3H), 6.79 – 6.71 (m, 1H), 6.55 (td,  $J = 8.6, 2.7$  Hz, 1H), 6.21 (td,  $J = 8.6, 2.7$  Hz, 1H).  $^{13}\text{C}$  NMR (101 MHz,  $\text{CDCl}_3$ )  $\delta = 162.68, 161.66$  (d,  $J = 246.4$  Hz), 161.44 (d,  $J = 248.0$  Hz), 150.70, 144.41, 141.11, 137.93, 137.37, 136.28, 132.62, 130.93, 133.24 (dd,  $J = 27.8, 8.0$  Hz), 132.30 (d,  $J = 3.5$  Hz), 132.01 (dd,  $J = 76.8, 8.3$  Hz), 130.85 (d,  $J = 3.6$  Hz), 130.85 (d,  $J = 3.6$  Hz), 128.85, 125.90, 125.67, 128.65 (d,  $J = 30.1$  Hz), 126.94, 125.43, 115.11 (d,  $J = 3.4$  Hz), 115.11 (d,  $J = 39.3$  Hz), 113.83, 113.8 (d,  $J = 42.8$  Hz).  $^{19}\text{F}$  NMR (376 MHz,  $\text{CDCl}_3$ )  $\delta = -113.24, -115.05$ .

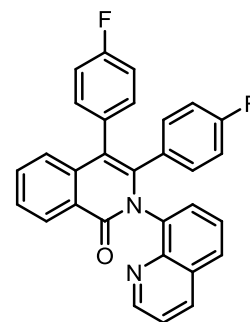

**3,4-bis(4-chlorophenyl)-2-(quinolin-8-yl)isoquinolin-1(2H)-one (3ae).** white solid (87%), mp 174.4-175.8°C.  $^1\text{H}$  NMR (400 MHz,  $\text{CDCl}_3$ )  $\delta = 8.90$  (dd,  $J = 4.2, 1.6$  Hz, 1H), 8.57 (dd,  $J = 8.0, 1.1$  Hz, 1H), 8.08 (dd,  $J = 8.3, 1.5$  Hz, 1H), 7.71 (dd,  $J = 8.2, 1.2$  Hz, 1H), 7.65 – 7.57 (m, 1H), 7.57 – 7.47 (m, 2H), 7.44 – 7.32 (m, 2H), 7.28 – 7.07 (m, 6H), 6.87 (ddd,  $J = 24.1, 8.2, 2.1$  Hz, 2H), 6.70 (dd,  $J = 8.3, 1.8$  Hz, 1H), 6.50 (dd,  $J = 8.3, 2.1$  Hz, 1H).  $^{13}\text{C}$  NMR (101 MHz,  $\text{CDCl}_3$ )  $\delta = 162.6, 150.8, 144.4, 140.8, 137.6, 137.2, 136.2, 134.8, 133.4,$

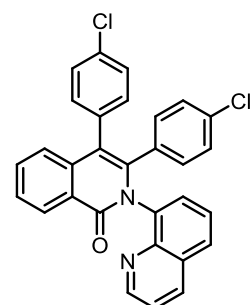

133.13, 133.07, 133.0, 132.8, 132.7, 131.9, 131.1, 130.8, 128.9, 128.8, 128.5, 128.3, 127.2, 127.1, 127.0, 125.9, 125.7, 125.4, 121.6, 117.5.

**3,4-bis(4-bromophenyl)-2-(quinolin-8-yl)isoquinolin-1(2H)-one (3af).**

white solid (83%), mp 176.3-178.2°C. <sup>1</sup>H NMR (400 MHz, CDCl<sub>3</sub>) δ = 8.91 (dd, *J*=4.2, 1.5, 1H), 8.56 (dd, *J*=7.9, 1.0, 1H), 8.11 (d, *J*=7.5, 1H), 7.73 (dd, *J*=8.2, 1.2, 1H), 7.66 – 7.58 (m, 1H), 7.58 – 7.47 (m, 2H), 7.46 – 7.32 (m, 4H), 7.24 (d, *J*=7.7, 1H), 7.08 (ddd, *J*=7.5, 5.3, 1.9, 2H), 7.00 (d, *J*=8.3, 1H), 6.84 (d, *J*=8.2, 1H), 6.66 (s, 2H). <sup>13</sup>C NMR (101 MHz, CDCl<sub>3</sub>) δ = 162.6, 150.8, 144.5, 140.7, 137.8, 137.2, 136.2, 135.3, 133.6, 133.4, 133.2, 132.7, 132.1, 131.5, 131.3, 130.8, 130.1, 129.9, 129.0, 128.8, 128.5, 127.1, 125.9, 125.7, 125.4, 121.8, 121.7, 121.3, 117.4.

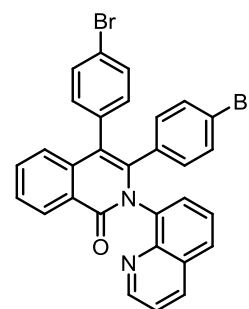

**3,4-bis(3-fluorophenyl)-2-(quinolin-8-yl)isoquinolin-1(2H)-one (3ag).**

white solid (86%), mp 136.0-137.8°C. <sup>1</sup>H NMR (400 MHz, CDCl<sub>3</sub>) δ = 8.96 – 8.86 (m, 1H), 8.58 (dd, *J*=8.0, 1.0, 1H), 8.07 (dd, *J*=8.1, 3.6, 1H), 7.69 (d, *J*=8.2, 1H), 7.66 – 7.58 (m, 1H), 7.58 – 7.48 (m, 2H), 7.45 – 7.34 (m, 2H), 7.30 – 7.11 (m, 2H), 7.06 – 6.74 (m, 4H), 6.73 – 6.54 (m, 1H), 6.49 (ddd, *J*=21.8, 9.3, 4.6, 2H). <sup>13</sup>C NMR (101 MHz, CDCl<sub>3</sub>) δ = 162.43 (ddd, *J* = 246.3, 11.9, 3.3 Hz), 161.15 (ddd, *J* = 246.4, 13.8, 3.4 Hz), 162.54, 150.93 (d, *J* = 4.8 Hz), 150.77 (d, *J* = 4.9 Hz), 144.54, 144.50, 140.57, 138.46 (ddd, *J* = 7.4, 5.2, 2.1 Hz), 137.50, 137.21 (d, *J* = 1.5 Hz), 136.49 (dd, *J* = 11.4, 6.0 Hz), 136.15, 132.70, 130.88, 130.83, 130.77, 129.77, 129.69, 129.54 (dd, *J* = 10.6, 2.0 Hz), 129.39, 128.91, 128.85, 128.82, 128.54, 128.44, 128.34 (d, *J* = 1.9 Hz), 128.27 (d, *J* = 4.6 Hz), 128.20 (d, *J* = 2.2 Hz), 128.11, 127.63, 127.60, 127.57, 127.40 (dd, *J* = 2.7, 1.2 Hz), 127.11, 126.58 (d, *J* = 2.4 Hz), 125.90 (d, *J* = 5.0 Hz), 125.77 (d, *J* = 3.4 Hz), 125.72 (d, *J* = 2.8 Hz), 125.41, 121.73 (d, *J* = 2.6 Hz), 118.77 (d, *J* = 2.0 Hz), 118.55, 118.34, 117.64 (d, *J* = 22.0 Hz), 117.46 (d, *J* = 1.8 Hz), 117.44, 117.42, 116.91 (d, *J* = 22.6 Hz), 114.35 (ddd, *J* = 24.1, 21.0, 3.9 Hz). <sup>19</sup>F NMR (376 MHz, CDCl<sub>3</sub>) δ = -113.34 (dd, *J*=104.7, 101.2), -114.00 (dd, *J*=108.6, 14.0).

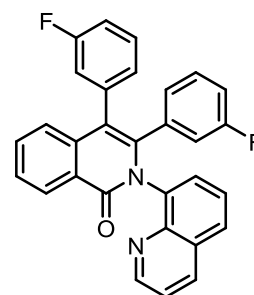

**3,4-bis(3-chlorophenyl)-2-(quinolin-8-yl)isoquinolin-1(2H)-one (3ah).**

white solid (85%), mp 153.5-155.2°C. <sup>1</sup>H NMR (400 MHz, CDCl<sub>3</sub>) δ = 9.02 – 8.81 (m, 1H), 8.58 (d, *J*=7.9, 1H), 8.18 – 7.97 (m, 1H), 7.71 (d, *J*=8.2, 1H), 7.65 (dd, *J*=11.1, 4.0, 1H), 7.60 – 7.34 (m, 4H), 7.29 – 7.24 (m, 2H), 7.14 (m, *J*=17.6, 16.0, 9.5, 5.1, 3H), 7.04 – 6.70 (m, 3H), 6.51 (ddd, *J*=41.1, 15.8, 7.8, 1H). <sup>13</sup>C NMR (101 MHz, CDCl<sub>3</sub>) δ = 162.54 (d, *J* = 2.5 Hz), 150.92 (d, *J* = 4.1 Hz), 150.75 (d, *J* = 4.8 Hz), 144.46, 140.68, 140.64, 140.55, 138.04, 137.45, 137.18, 137.09, 136.23, 136.14, 136.13, 136.09, 136.05, 133.92 (dd, *J* = 19.1, 16.6 Hz), 132.76, 132.57 (d, *J* = 3.2 Hz), 131.67 (d, *J* = 20.1 Hz), 131.59 (d, *J* = 21.2 Hz), 130.96, 130.72 (d, *J* = 3.8 Hz), 130.62 (d, *J* = 8.5 Hz), 130.09, 130.06, 129.97, 129.80 (d, *J* = 7.5 Hz), 129.58, 129.39 (d, *J* = 4.0 Hz), 129.22, 128.96 (d, *J* = 7.0 Hz), 128.88, 128.86, 128.75 (d, *J* = 5.6 Hz), 128.56, 128.13 (d, *J* = 5.6 Hz), 127.93 (d, *J* = 3.0 Hz), 127.91 (d, *J* = 17.3 Hz), 127.71 (dd, *J* = 4.3, 1.3 Hz), 127.37, 127.17 (d, *J* = 2.1 Hz), 125.97, 125.85 (d, *J* = 6.2 Hz), 125.73, 125.72, 125.69, 125.41, 121.74, 121.72, 121.62, 121.60, 117.50, 117.42 (dd, *J* = 9.6, 5.1 Hz), 117.35.

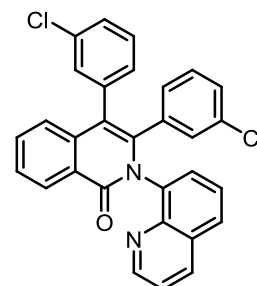



**2-(quinolin-8-yl)-3,4-di-m-tolylisoquinolin-1(2H)-one (3ai).** white solid (79%), mp 132.6-134.5°C. <sup>1</sup>H NMR (400 MHz, CDCl<sub>3</sub>) δ 8.95 (ddd, *J* = 16.7, 4.2, 1.6 Hz, 1H), 8.64 – 8.47 (m, 1H), 8.07 (dd, *J* = 10.5, 3.9 Hz, 1H), 7.71 – 7.54 (m, 2H), 7.54 – 7.28 (m, 5H), 7.17 – 6.90 (m, 4H), 6.82 – 6.65 (m, 2H), 6.53 (t, *J* = 15.7 Hz, 2H), 6.37 (td, *J* = 7.6, 2.8 Hz, 1H), 2.33 – 2.14 (m, 3H), 1.81 (dd, *J* = 158.3, 5.8 Hz, 3H). <sup>13</sup>C NMR (101 MHz, CDCl<sub>3</sub>) δ = 162.7, 150.5, 141.8, 138.2, 137.9, 137.4, 137.1, 137.0, 136.5, 136.4, 136.1, 135.9, 135.9, 135.8, 135.7, 134.7, 132.6, 132.5, 132.4, 132.3, 131.6, 131.5, 130.9, 130.6, 130.6, 128.9, 128.8, 128.7, 128.7, 128.4, 128.3, 127.8, 127.8, 127.5, 127.5, 127.4, 127.4, 127.0, 126.9, 126.5, 126.40, 126.38, 126.2, 126.1, 125.9, 125.7, 125.5, 121.41, 121.39, 121.3, 118.5, 21.32, 21.25, 21.00, 20.56.

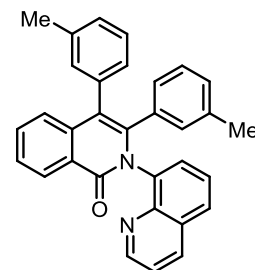

**3-(4-chlorophenyl)-4-(4-fluorophenyl)-2-(quinolin-8-yl)isoquinolin-1(2H)-one (3aj) and 4-(4-chlorophenyl)-3-(4-fluorophenyl)-2-(quinolin-8-yl)isoquinolin-1(2H)-one (3ak).** white solid (82%), <sup>1</sup>H NMR (400 MHz, CDCl<sub>3</sub>) δ 8.90 (dd, *J* = 4.2, 1.7 Hz, 1H), 8.57 (dd, *J* = 7.9, 0.8 Hz, 1H), 8.12 – 8.02 (m, 1H), 7.71 (ddd, *J* = 8.2, 4.2, 1.3 Hz, 1H), 7.65 – 7.57 (m, 1H), 7.57 – 7.46 (m, 2H),

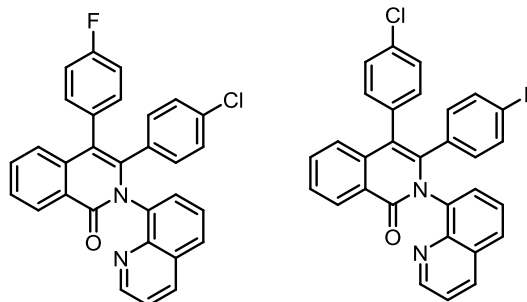

7.45 – 7.34 (m, 2H), 7.29 – 7.09 (m, 4H), 6.98 – 6.86 (m, 2H), 6.83 (dd, *J* = 8.2, 2.1 Hz, 1H), 6.77 – 6.67 (m, 1H), 6.59 – 6.46 (m, 1H), 6.22 (td, *J* = 8.6, 2.7 Hz, 1H). <sup>13</sup>C NMR (101 MHz, CDCl<sub>3</sub>) δ = 161.69 (d, *J* = 246.5 Hz), 161.49 (d, *J* = 248.2 Hz), 162.7, 162.6, 150.8, 144.4, 141.0, 140.9, 137.9, 137.7, 137.34, 137.29, 136.2, 134.9, 133.4, 133.3, 133.13, 133.10, 133.05, 132.89, 132.87, 132.6, 132.36 (d, *J* = 8.3 Hz), 132.13 (d, *J* = 3.5 Hz), 131.9, 131.60 (d, *J* = 8.2 Hz), 131.1, 130.8, 130.70 (d, *J* = 3.5 Hz), 128.9, 128.8, 128.8, 128.49 (d, *J* = 8.4 Hz), 128.5, 128.3, 126.99 (d, *J* = 19.6 Hz), 127.0, 125.9, 125.76 (d, *J* = 20.9 Hz), 125.4, 125.3, 121.6, 117.7, 117.6, 115.4, 115.17 (d, *J* = 3.0 Hz), 115.0, 114.1, 113.89 (d, *J* = 1.5 Hz) 113.7. <sup>19</sup>F NMR (376 MHz, CDCl<sub>3</sub>) δ = -113.02, -114.85.

**3-(4-chlorophenyl)-2-(quinolin-8-yl)-4-(p-tolyl)isoquinolin-1(2H)-one (3al) and**

**4-(4-chlorophenyl)-2-(quinolin-8-yl)-3-(p-tolyl)isoquinolin-1(2H)-one (3am).** white solid (90%), <sup>1</sup>H NMR (400 MHz, CDCl<sub>3</sub>) δ = 8.97 – 8.87 (m, 1H), 8.56 (dd, *J* = 8.0, 1.4, 1H), 8.06 (ddd, *J* = 7.2, 5.5, 1.6, 1H), 7.67 (ddd, *J* = 12.3, 8.2, 1.2, 1H), 7.59 (ddd, *J* = 8.4, 4.0, 2.0, 1H), 7.55 – 7.44 (m, 2H), 7.43 – 7.32 (m, 2H), 7.30 (d,

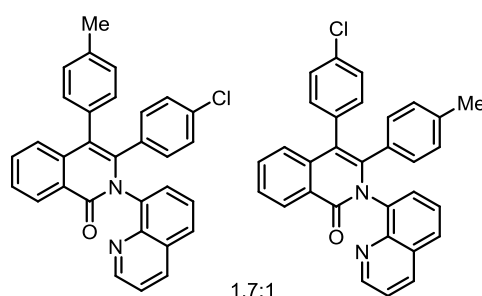

*J* = 7.6, 1H), 7.22 (dd, *J* = 8.5, 2.1, 1H), 7.20 – 7.14 (m, 1H), 7.12 (dd, *J* = 11.4, 1.8, 1H), 7.10 – 6.97 (m, 3H), 6.91 (dd, *J* = 8.3, 2.0, 1H), 6.84 – 6.77 (m, 1H), 6.71 (dd, *J* = 8.3, 2.0, 1H), 6.65 (d, *J* = 7.7, 1H), 6.59 (dd, *J* = 7.9, 1.7, 1H), 6.47 (dd, *J* = 8.3, 2.1, 1H), 6.30 (d, *J* = 7.7, 1H), 2.28 (s, 2H), 1.95 (s, 1H). <sup>13</sup>C NMR (101 MHz, CDCl<sub>3</sub>) δ = 162.7, 162.6, 150.8, 150.7, 144.6, 142.3, 140.5, 138.2, 137.9, 137.6, 137.5, 137.0, 136.5, 136.1, 136.0, 135.3, 133.6, 133.2, 133.1, 133.0, 132.97, 132.6, 132.5, 132.5, 132.0, 131.6, 131.5, 131.3, 131.2, 130.8, 130.76, 130.5, 129.4, 128.9, 128.81, 128.79, 128.7, 128.52, 128.49, 128.4, 128.3, 128.1, 127.6, 127.3, 126.9, 126.8, 126.7, 126.7, 125.8, 125.8, 125.6, 125.5, 125.2, 121.6, 121.5, 118.7, 117.2, 21.2, 21.0.

**3,4-diethyl-2-(quinolin-8-yl)isoquinolin-1(2H)-one (3an).** white solid

(79%), mp 122.4-124.0°C. <sup>1</sup>H NMR (400 MHz, CDCl<sub>3</sub>) δ 8.86 (dd, *J* = 4.2, 1.7 Hz, 1H), 8.46 (dd, *J* = 8.0, 1.1 Hz, 1H), 8.24 (dd, *J* = 8.3, 1.7 Hz, 1H), 7.96 (dd, *J* = 7.9, 1.8 Hz, 1H), 7.78 (d, *J* = 8.1 Hz, 1H), 7.75 – 7.63 (m, 3H), 7.49 – 7.35 (m, 2H), 2.87 (q, *J* = 7.5 Hz, 2H), 2.57 (dd, *J* = 14.9, 7.5 Hz, 1H), 2.08 (dd, *J* = 14.8, 7.5 Hz, 1H), 1.33 (t, *J* = 7.5 Hz, 3H),

0.88 (t, *J* = 7.5 Hz, 3H). <sup>13</sup>C NMR (101 MHz, CDCl<sub>3</sub>) δ = 163.2, 151.3, 144.8, 141.7, 137.44, 137.38, 136.3, 134.2, 132.4, 130.4, 129.3, 129.1, 128.7, 126.2, 125.62, 125.55, 123.9, 122.8, 121.8, 114.6, 23.6, 20.7, 14.9, 14.1.

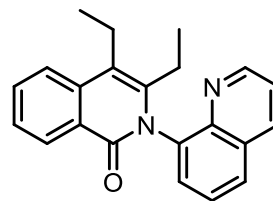

## 4. References

- (S1) L. Zeng, H. Li, S. Tang, X. Gao, Y. Deng, G. Zhang, C.-W. Pao, J.-L. Chen, J.-F. Lee and A. Lei, *ACS Catalysis*, 2018, **8**, 5448.
- (S2) N. Barsu, D. Kalsi and B. Sundararaju, *Catal. Sci. Technol.*, 2018, **8**, 5963.
- (S3) B. Khan, A. A. Khan, R. Kant and D. Koley, *Adv. Synth. Catal.*, 2016, **358**, 3753.
- (S4) T. Shiba, T. Kurahashi and S. Matsubara, *J. Am. Chem. Soc.*, 2013, **135**, 13636.
- (S5) Y. Kajita, S. Matsubara and T. Kurahashi, *J. Am. Chem. Soc.*, 2008, **130**, 6058.
- (S6) Sheldrick, G. M. *SHELXTL-97, Program for X-ray Crystal Structure Solution*; University of Göttingen: Göttingen, Germany, **1997**.

## 5. Single-Crystal X-Ray Crystallography

5.1 Crystal structure of targeted isoquinolone 3ga'. The displacement ellipsoids are drawn at the 30% probability.

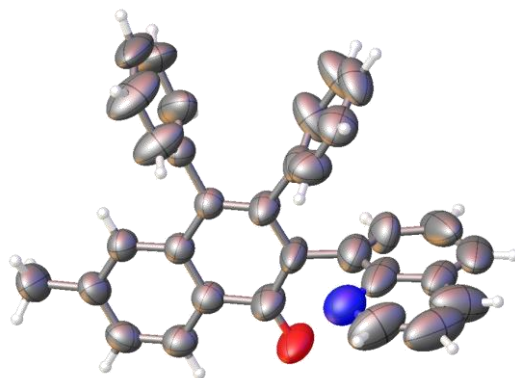

3ga'

**Table S1.** Crystal data and structure refinement details for targeted **3ga'**.

| <b>3ga'</b>                                                            |                                                                      |
|------------------------------------------------------------------------|----------------------------------------------------------------------|
| Empirical formula                                                      | C <sub>12.8</sub> H <sub>8.8</sub> N <sub>0.4</sub> O <sub>0.4</sub> |
| Formula weight                                                         | 174.60                                                               |
| Crystal system                                                         | triclinic                                                            |
| Space group                                                            | P-1                                                                  |
| a / Å                                                                  | 9.6741(10)                                                           |
| b / Å                                                                  | 10.8198(12)                                                          |
| c / Å                                                                  | 12.5635(11)                                                          |
| α / °                                                                  | 69.234(9)                                                            |
| β / °                                                                  | 89.878(8)                                                            |
| γ / °                                                                  | 72.178(10)                                                           |
| Volume / Å <sup>3</sup>                                                | 1162.2(2)                                                            |
| Z                                                                      | 5                                                                    |
| D / g cm <sup>-3</sup>                                                 | 1.247                                                                |
| μ / mm <sup>-1</sup>                                                   | 0.580                                                                |
| F (000)                                                                | 458.0                                                                |
| R <sub>int</sub>                                                       | 0.0334                                                               |
| Goodness-of-fit on F <sup>2</sup>                                      | 2.237                                                                |
| R <sub>1</sub> <sup>a</sup> / wR <sub>2</sub> <sup>b</sup> [I > 2σ(I)] | 0.1657/0.4066                                                        |
| R <sub>1</sub> <sup>a</sup> / wR <sub>2</sub> <sup>b</sup> (all data)  | 0.1907/0.4291                                                        |
| CCDC number                                                            | 2026038                                                              |

<sup>a</sup>  $R_1 = \Sigma||F_o| - |F_c||/\Sigma|F_o|$ . <sup>b</sup>  $wR_2 = |\Sigma w(|F_o|^2 - |F_c|^2)|/\Sigma w(F_o^2)^{1/2}$ , where  $w = 1/[\sigma^2(F_o^2) + (aP)^2 + bP]$ .  $P = (F_o^2 + 2F_c^2)/3$ .

## 6. Copy of NMR ( $^1\text{H}$ , $^{13}\text{C}$ , $^{19}\text{F}$ ) Spectra

# Compound 1c

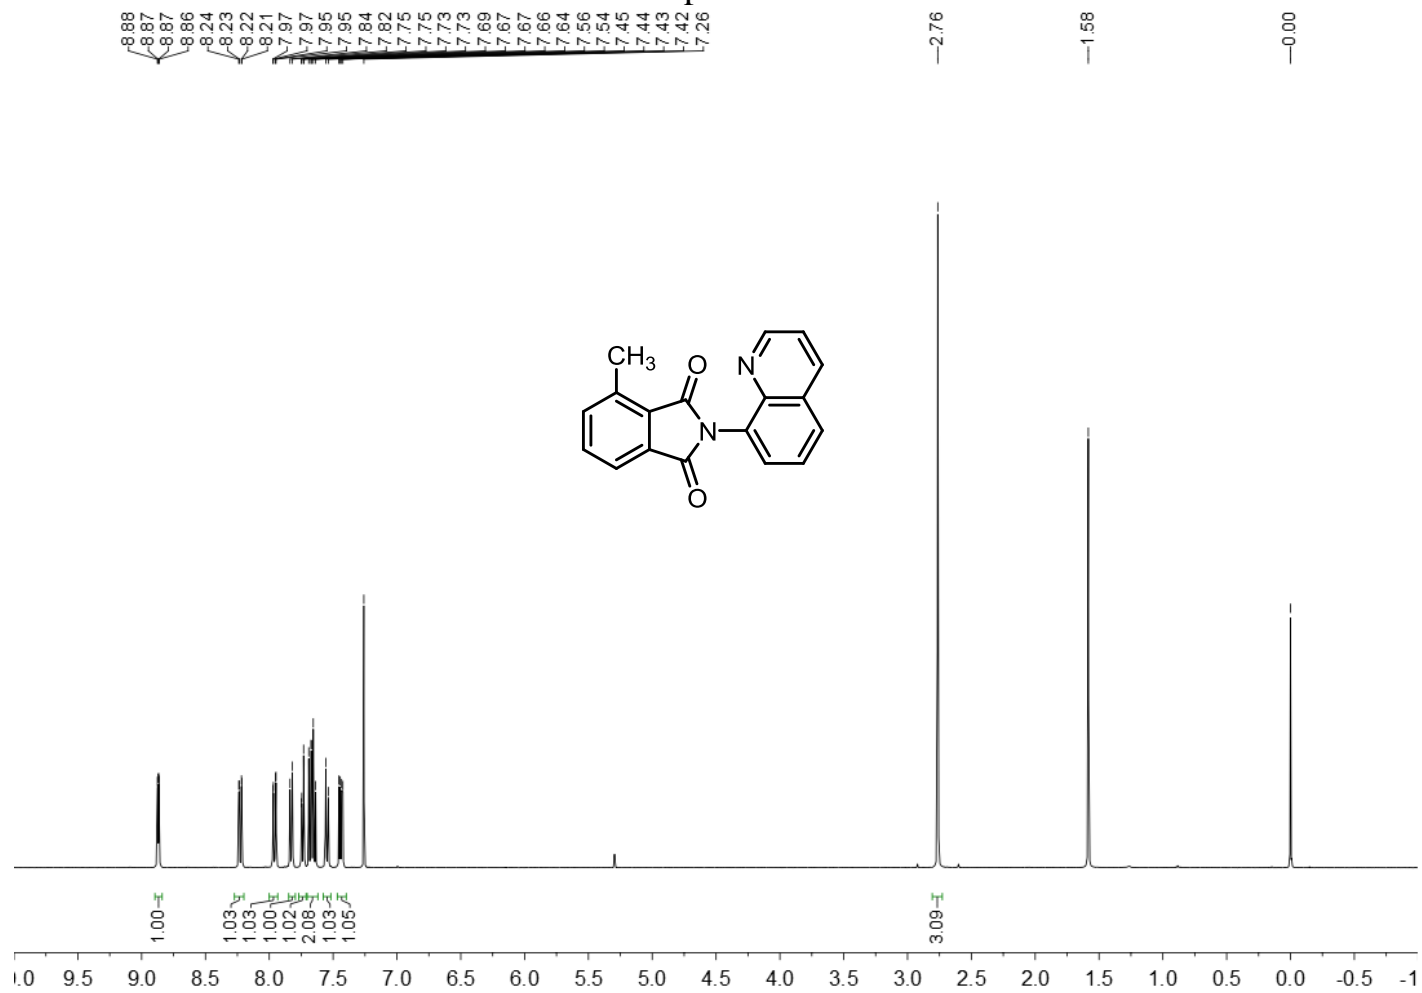

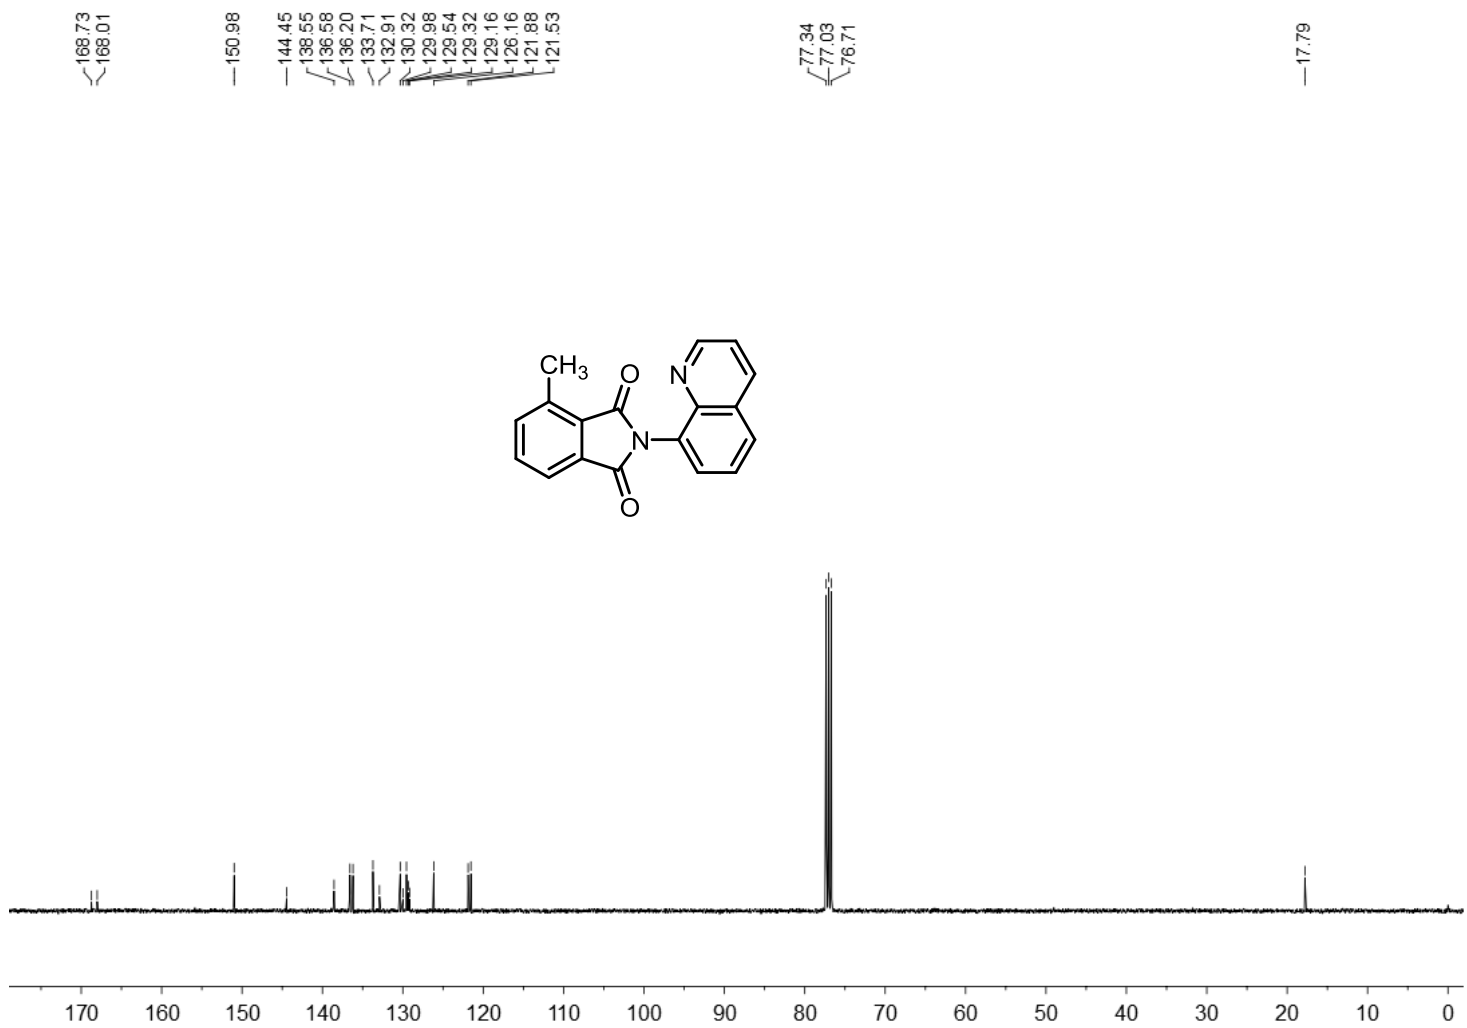



# Compound 3aa

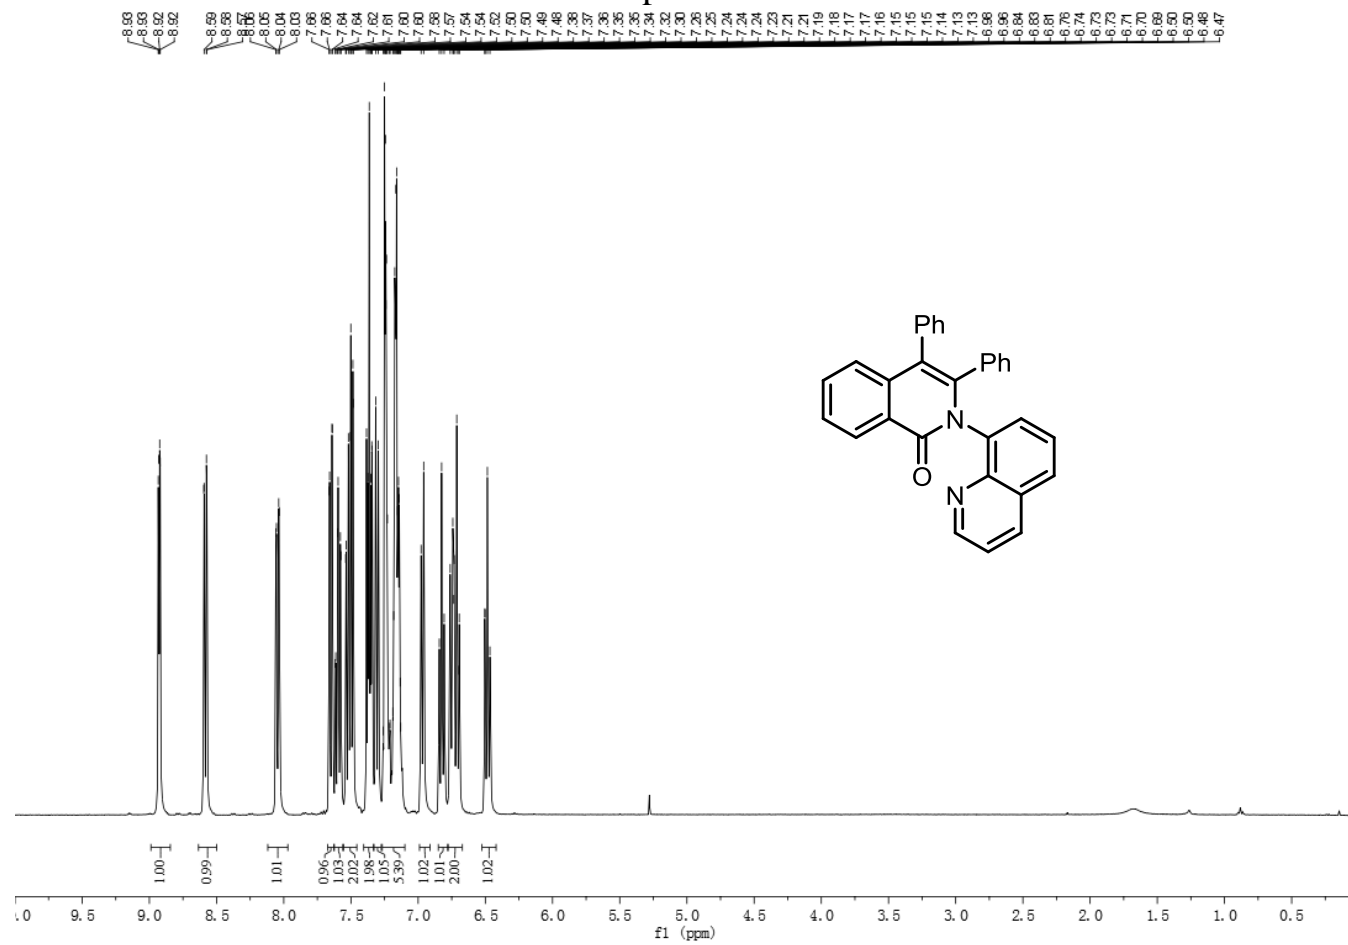

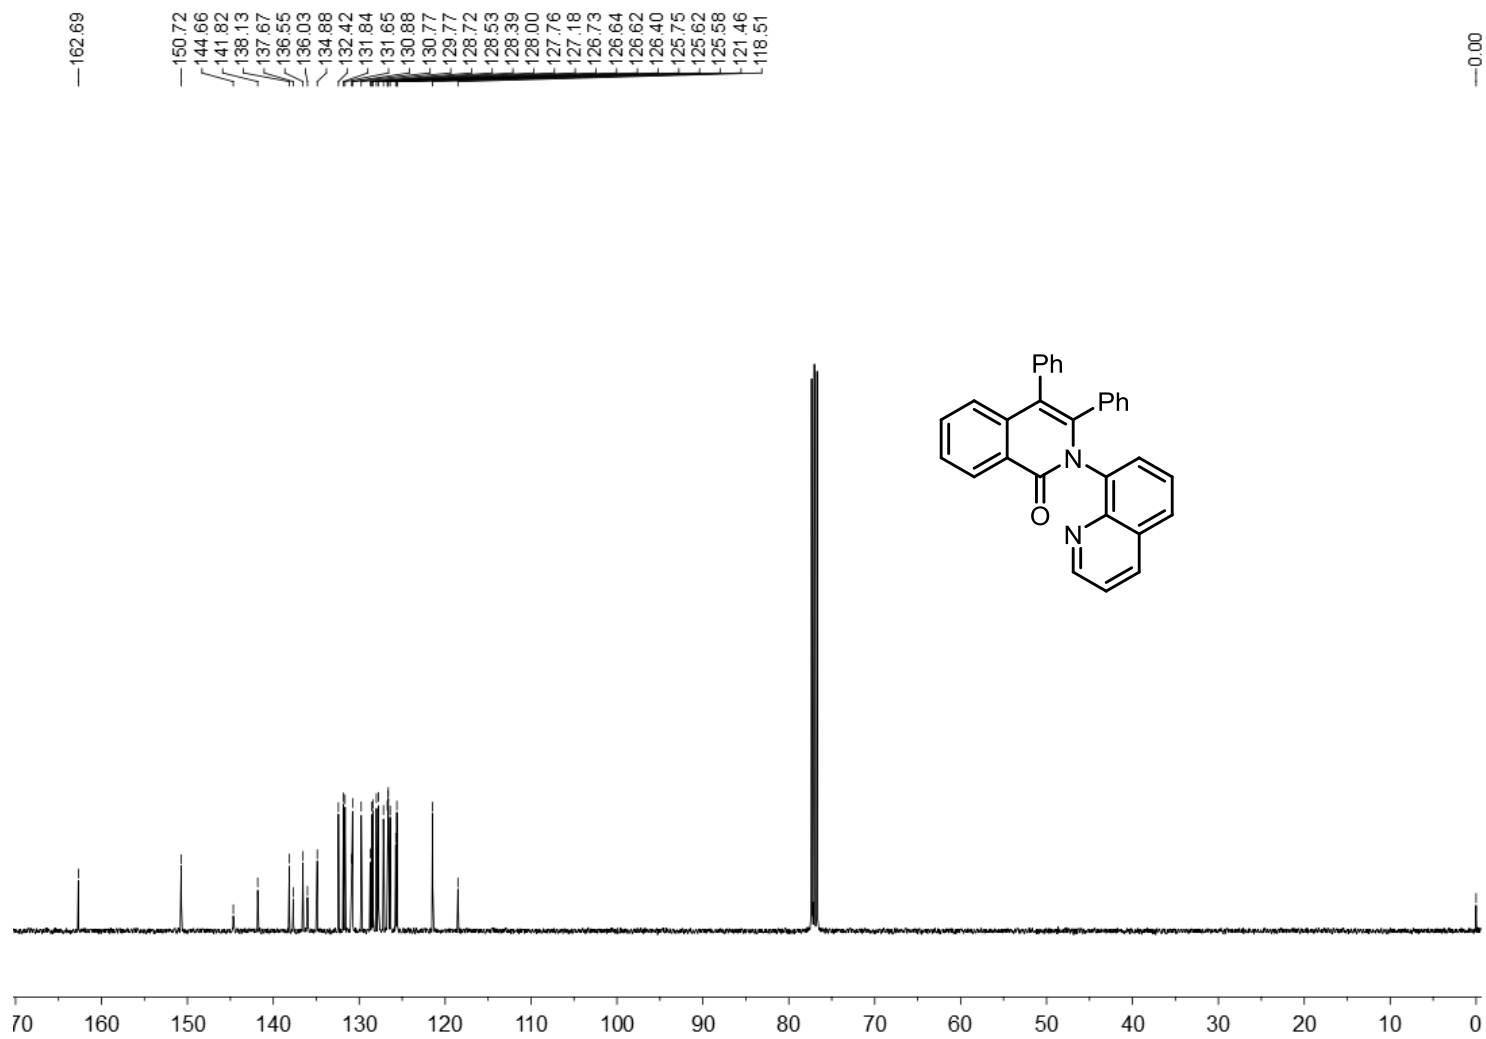

# Compound 3ba

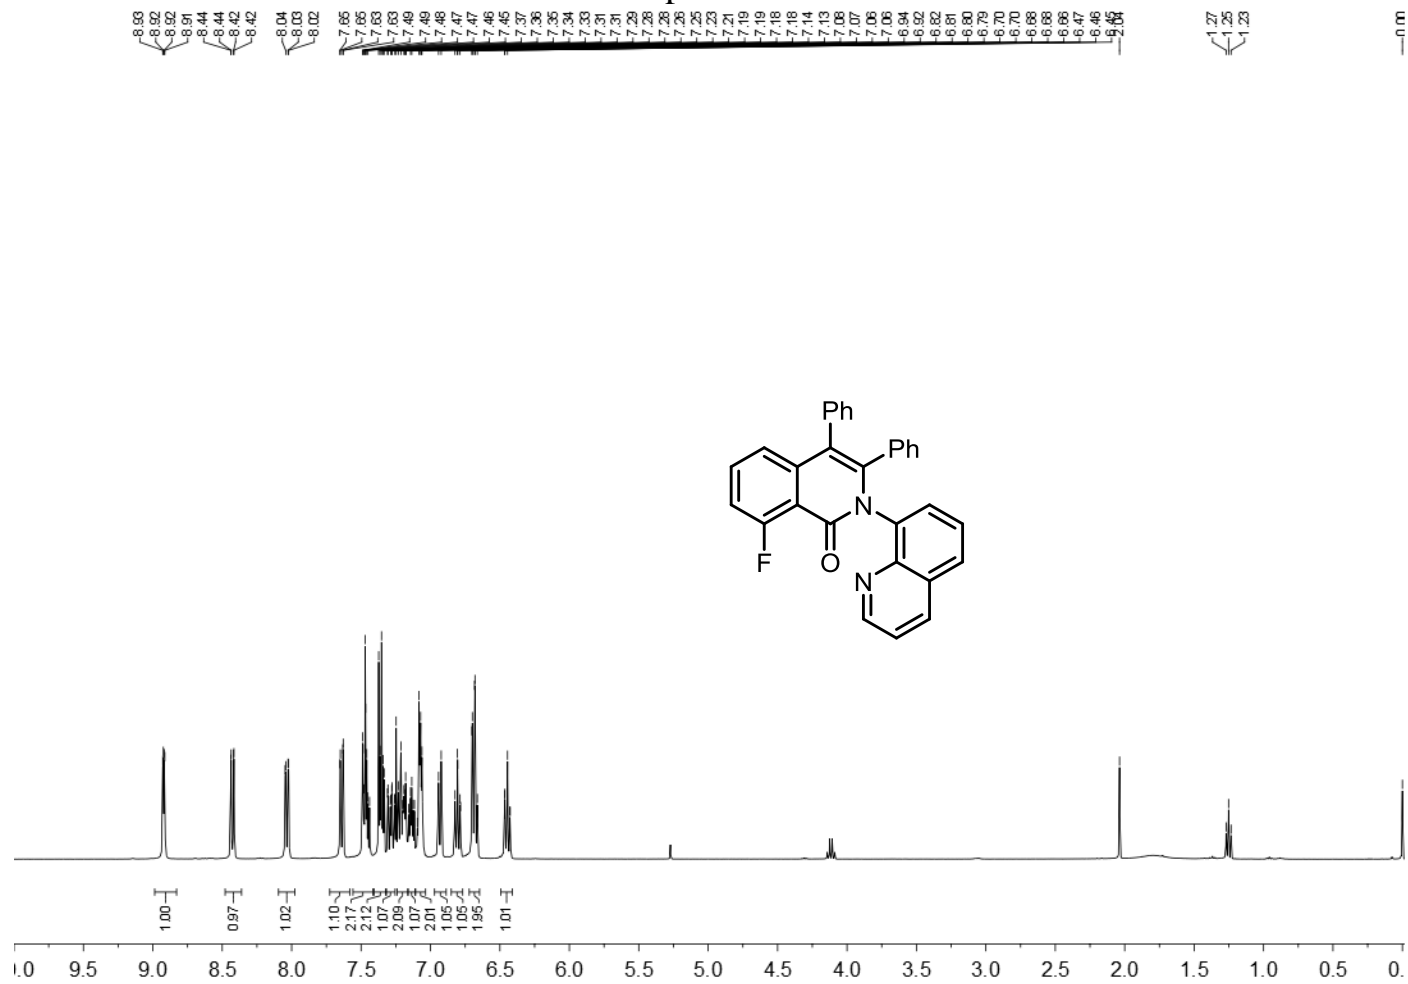

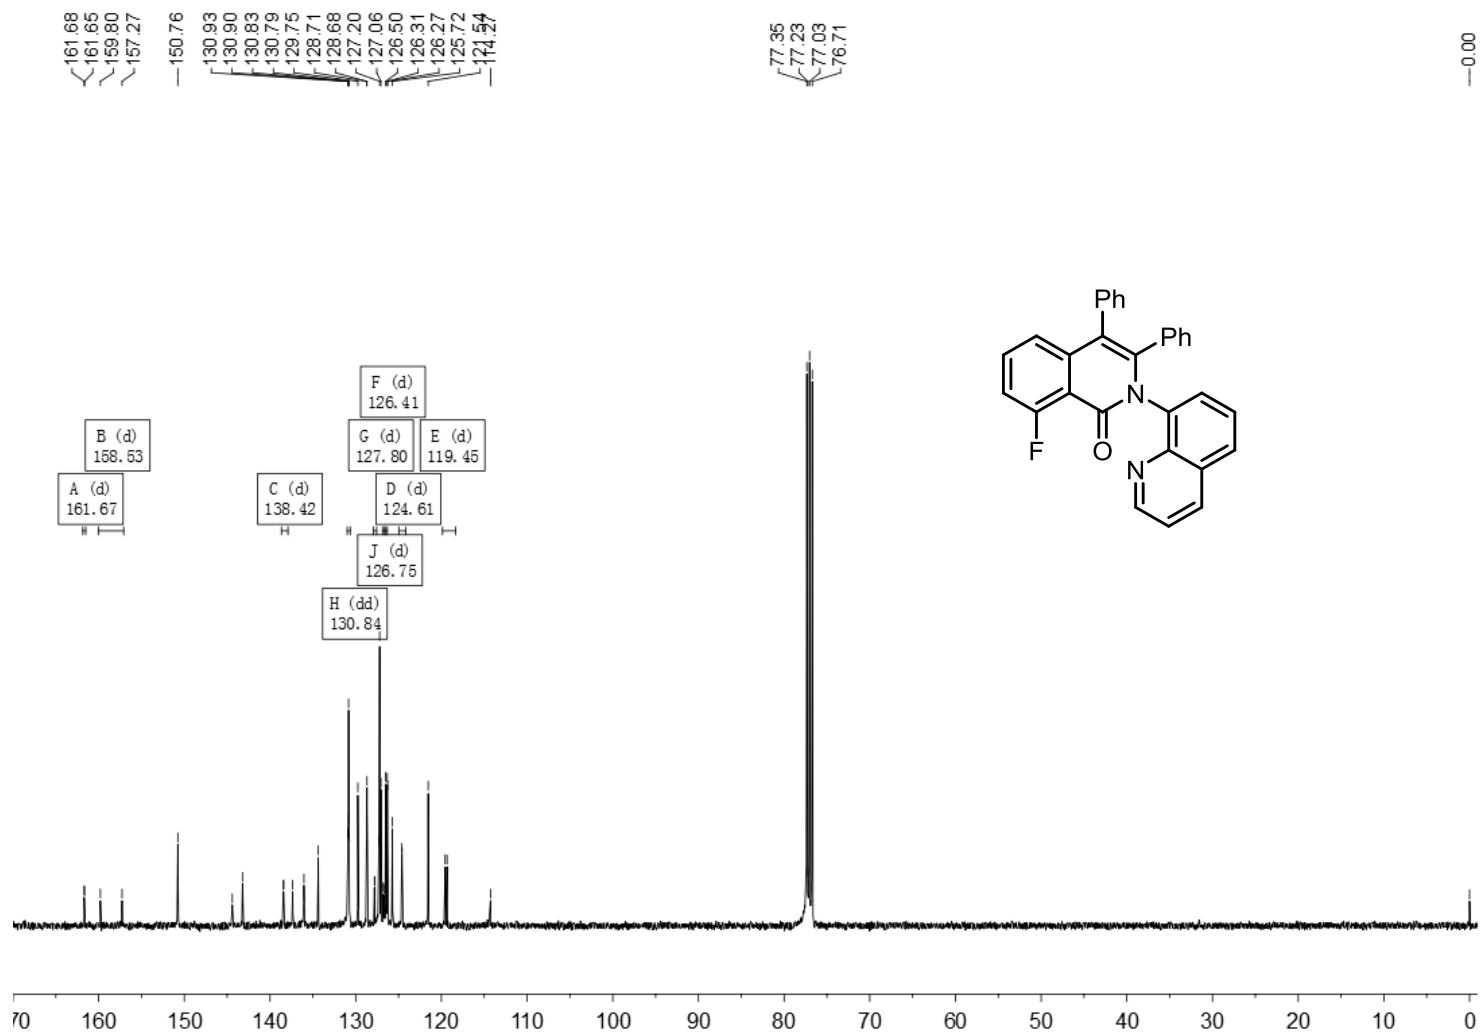

### Compound 3ca

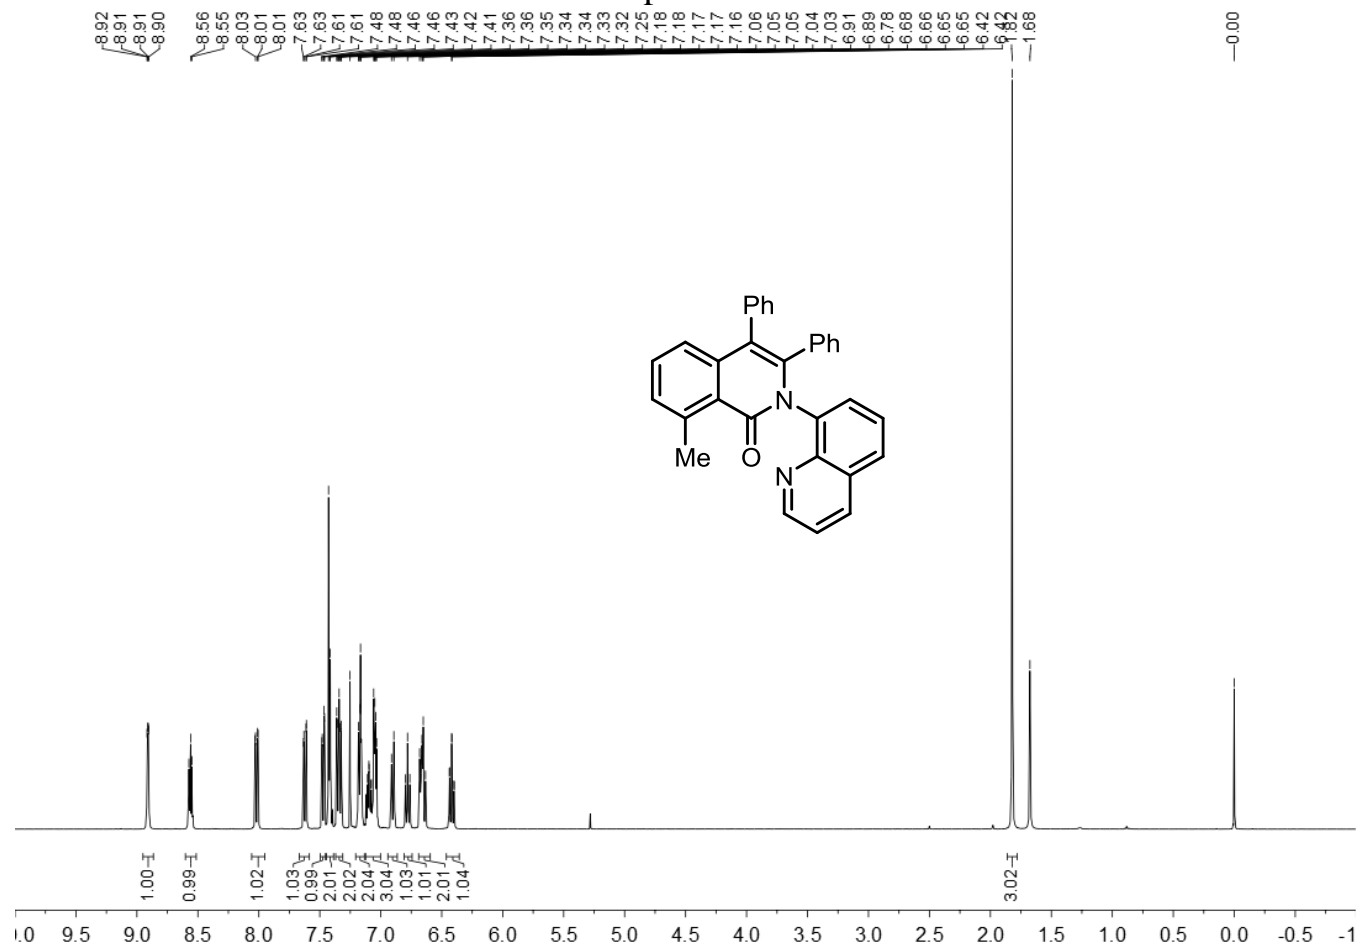

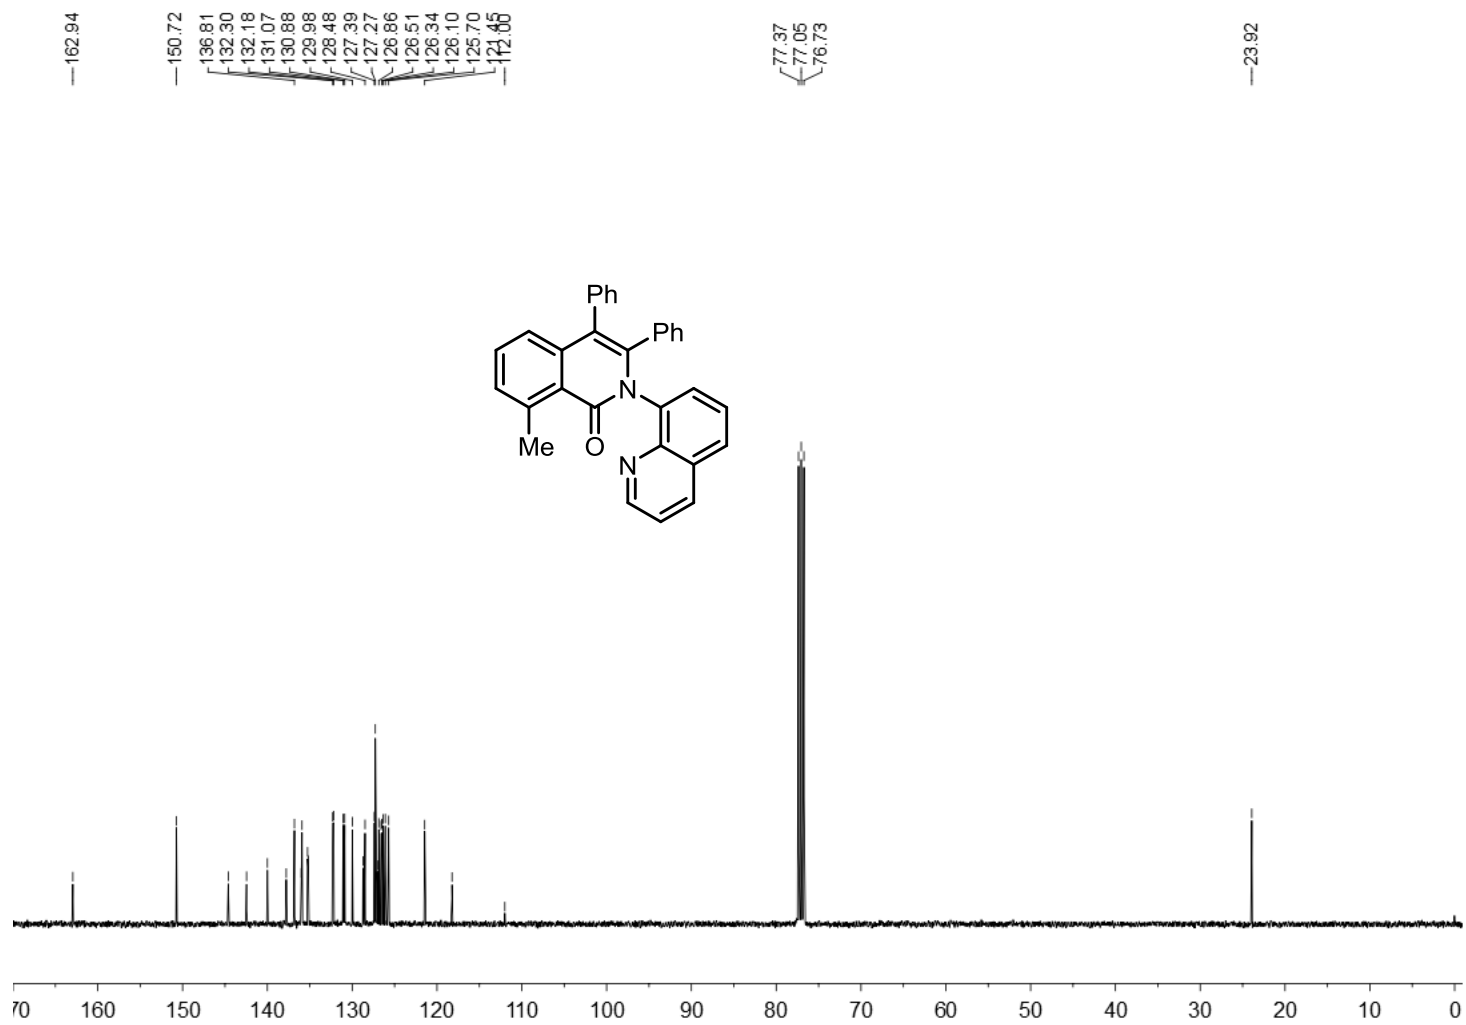

### Compound 3da

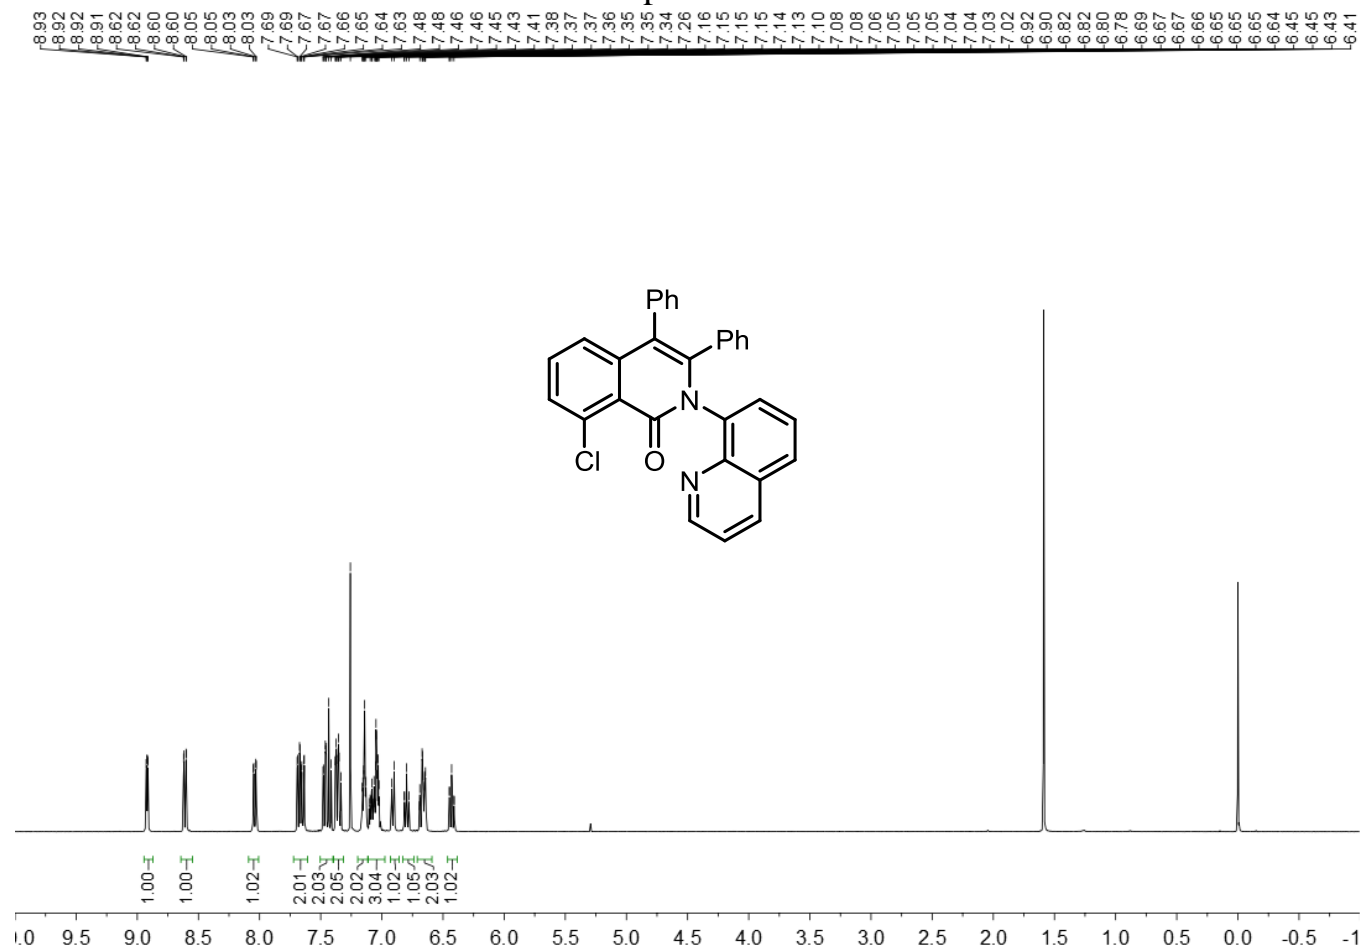

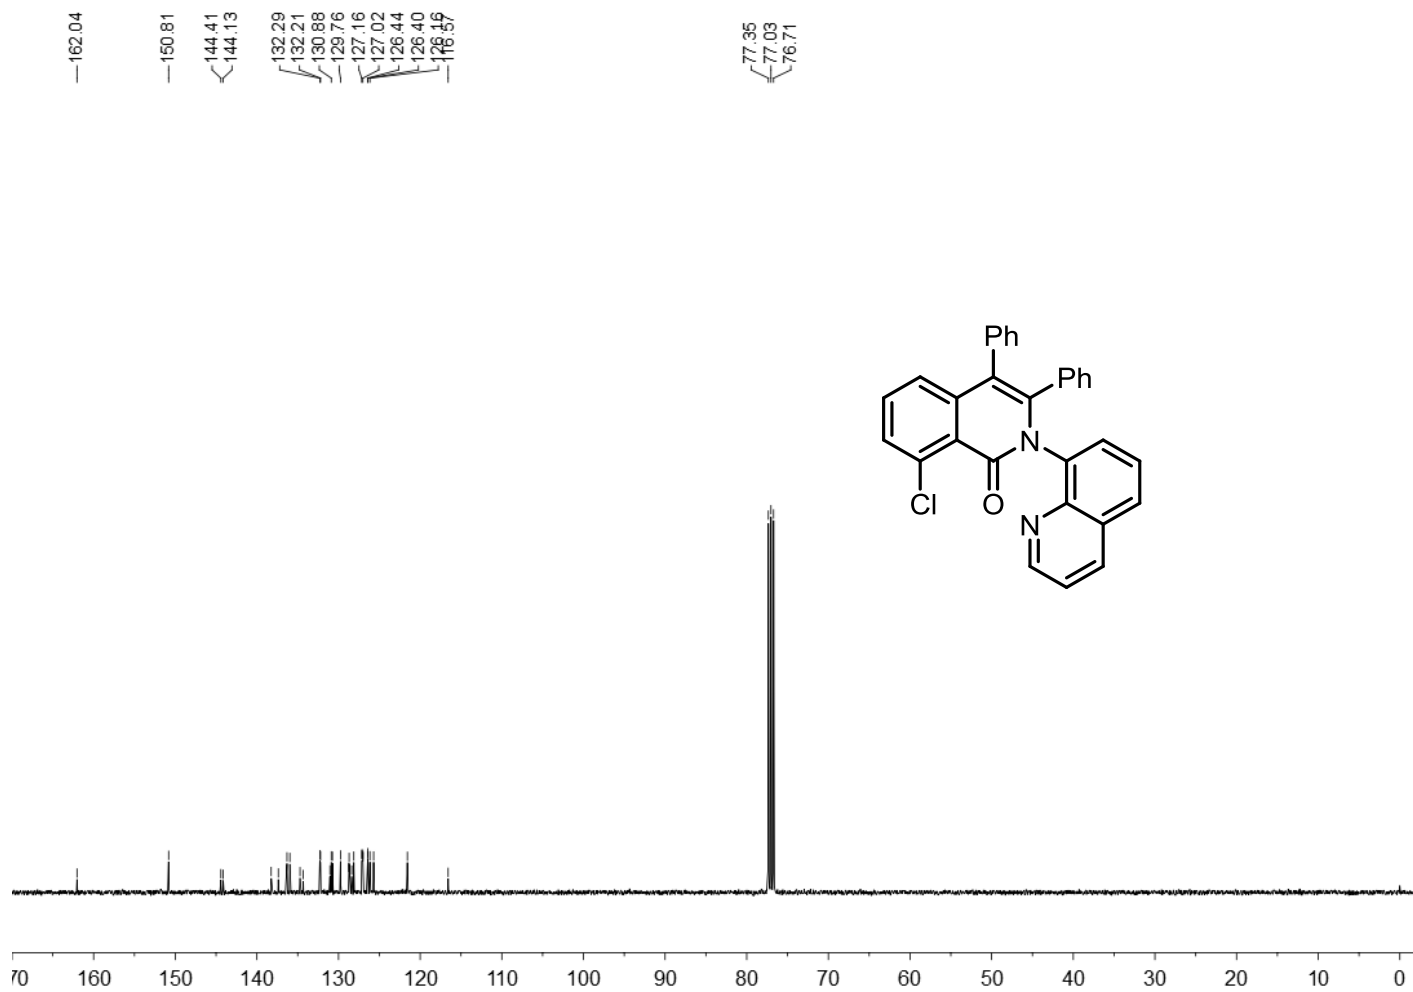



### Compound 3ea

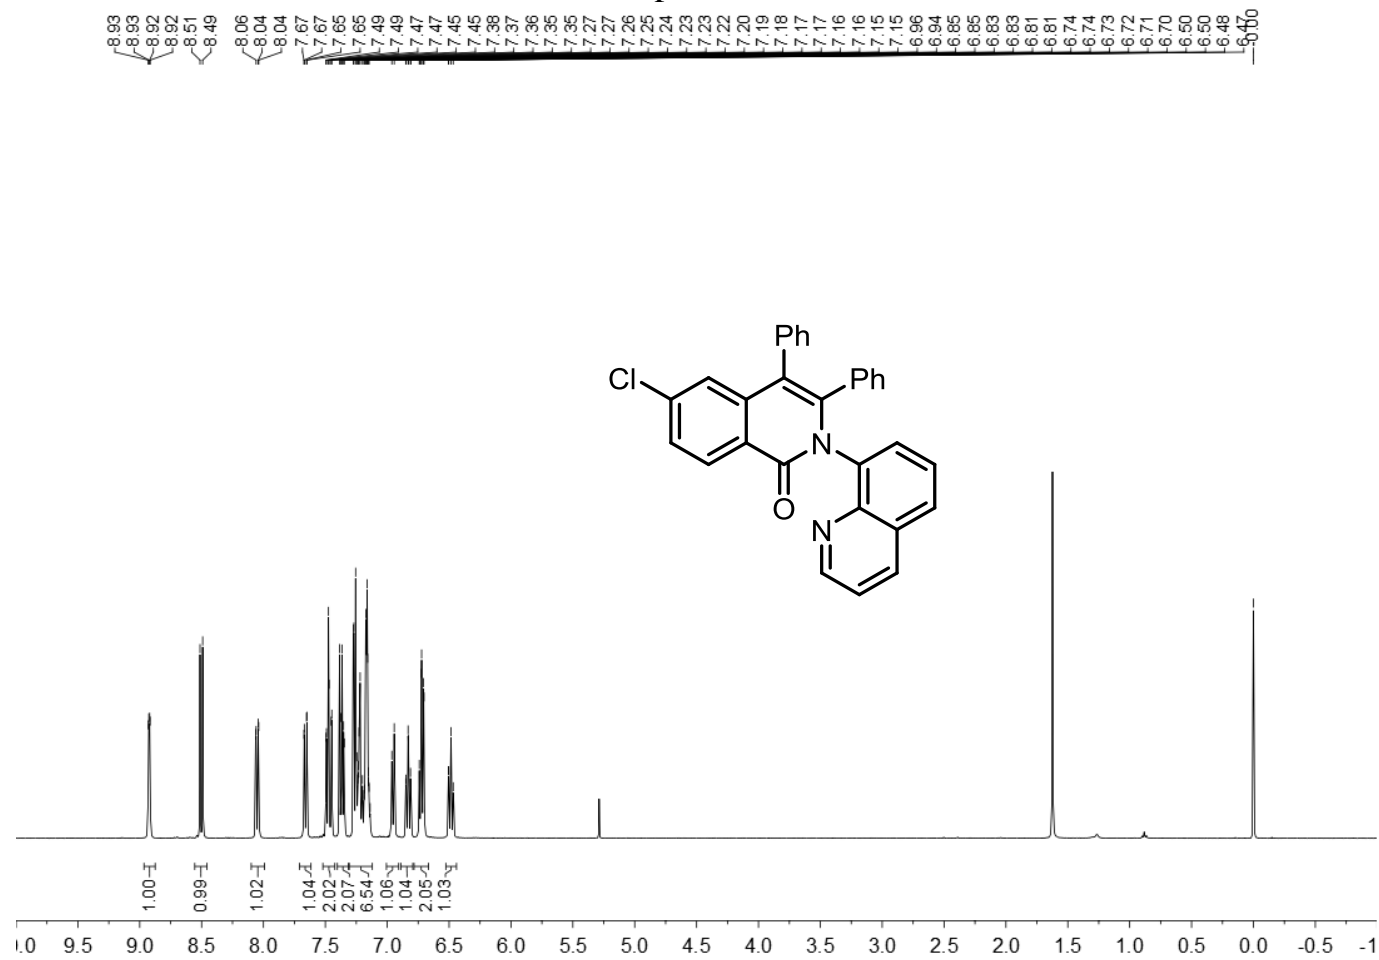

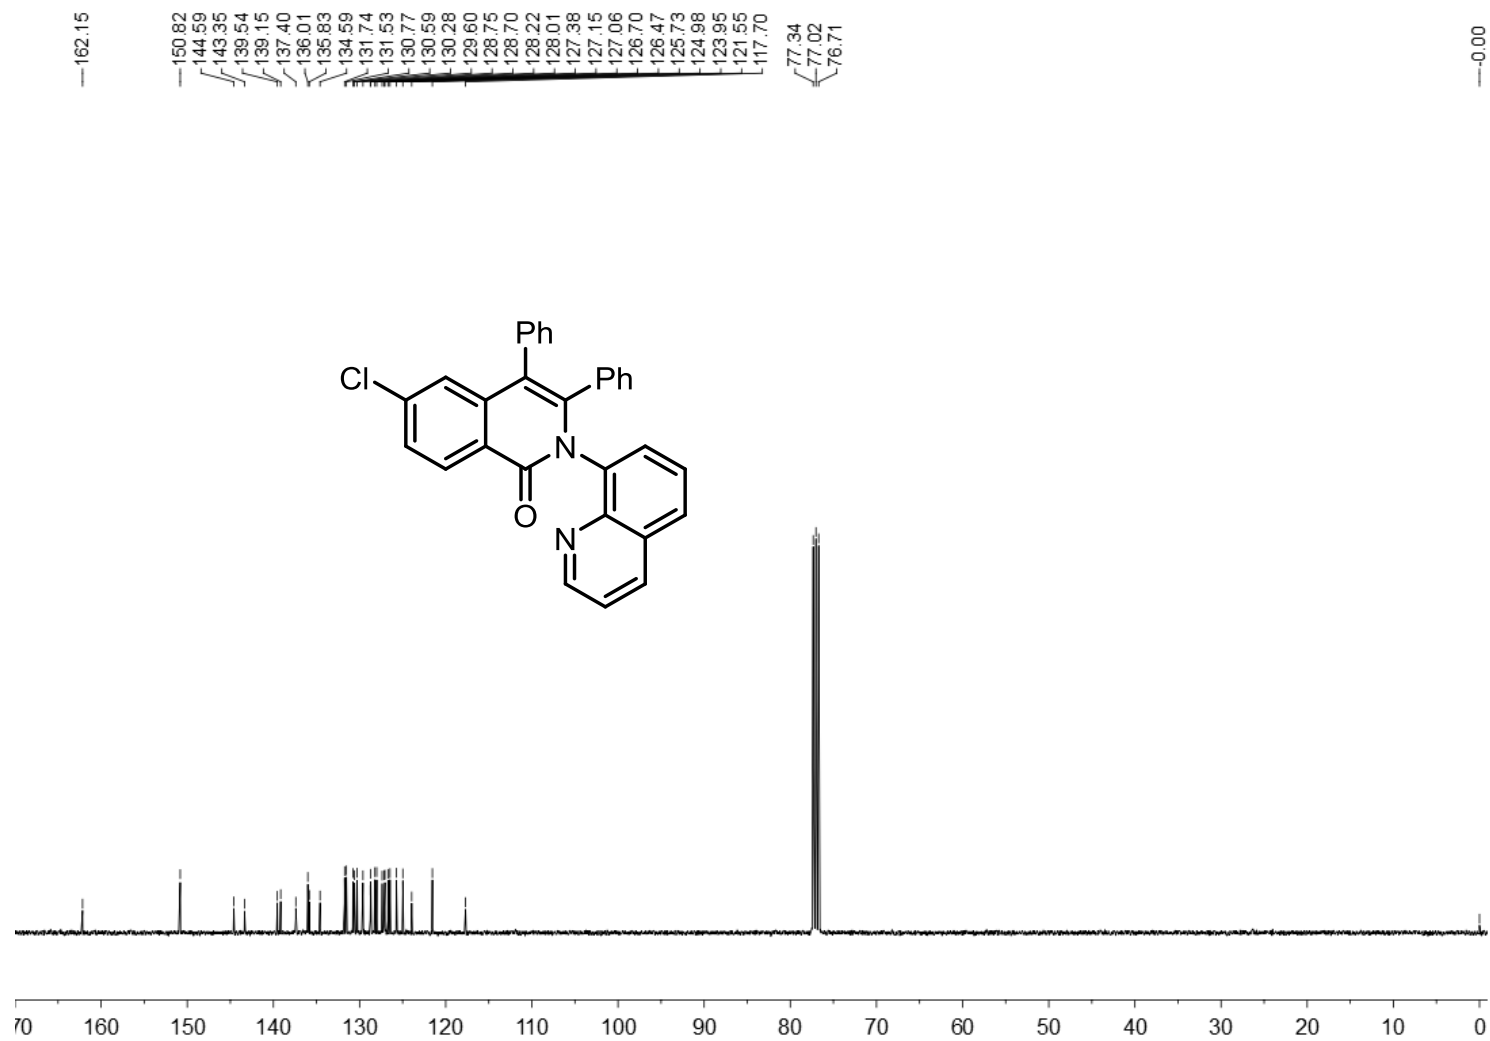

# Compound 3ea'

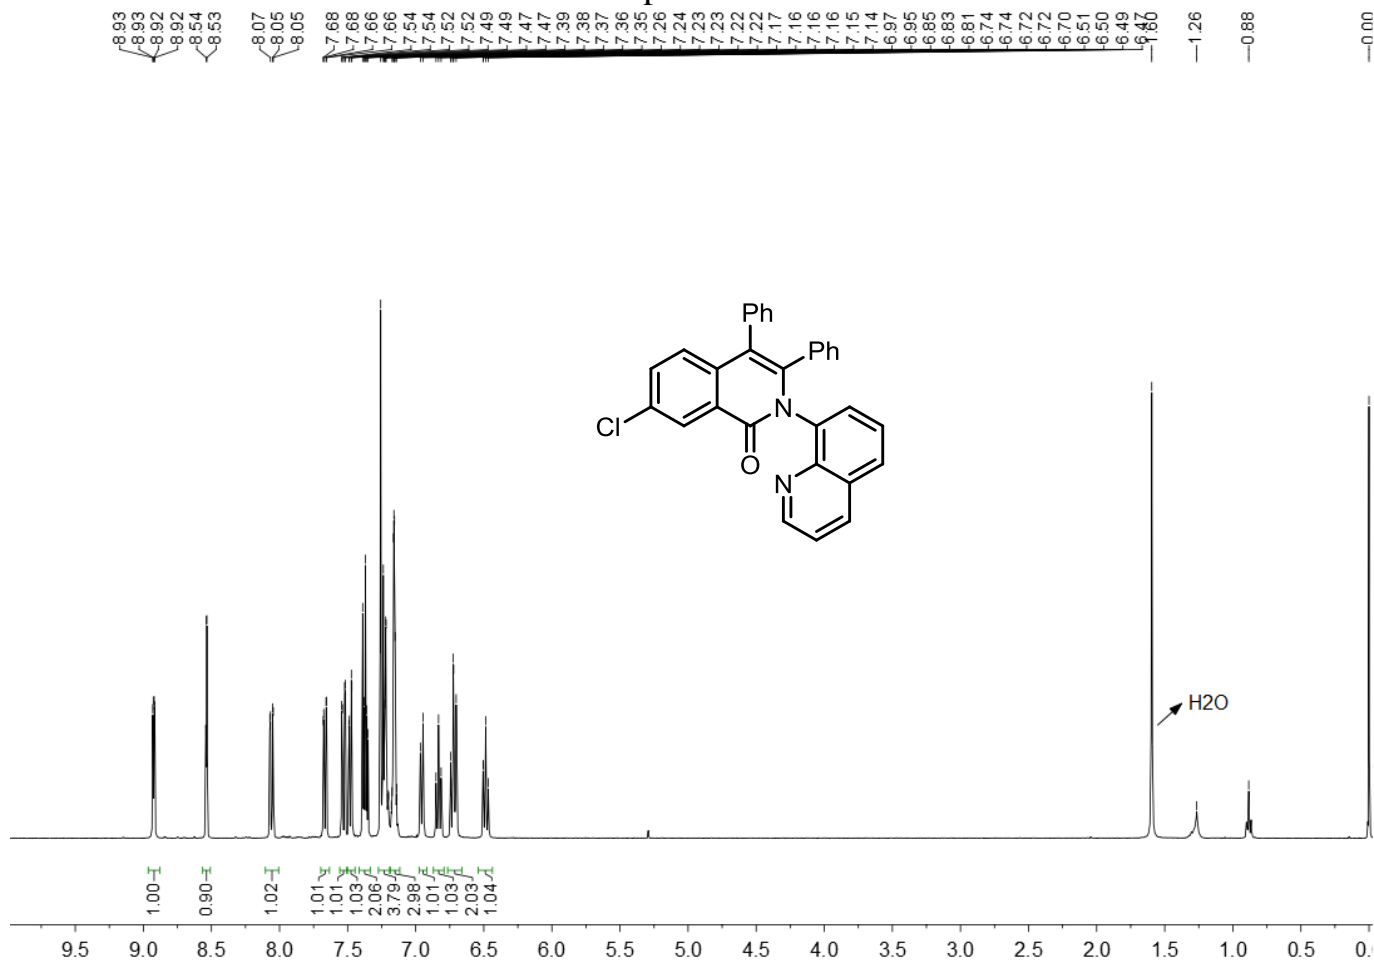

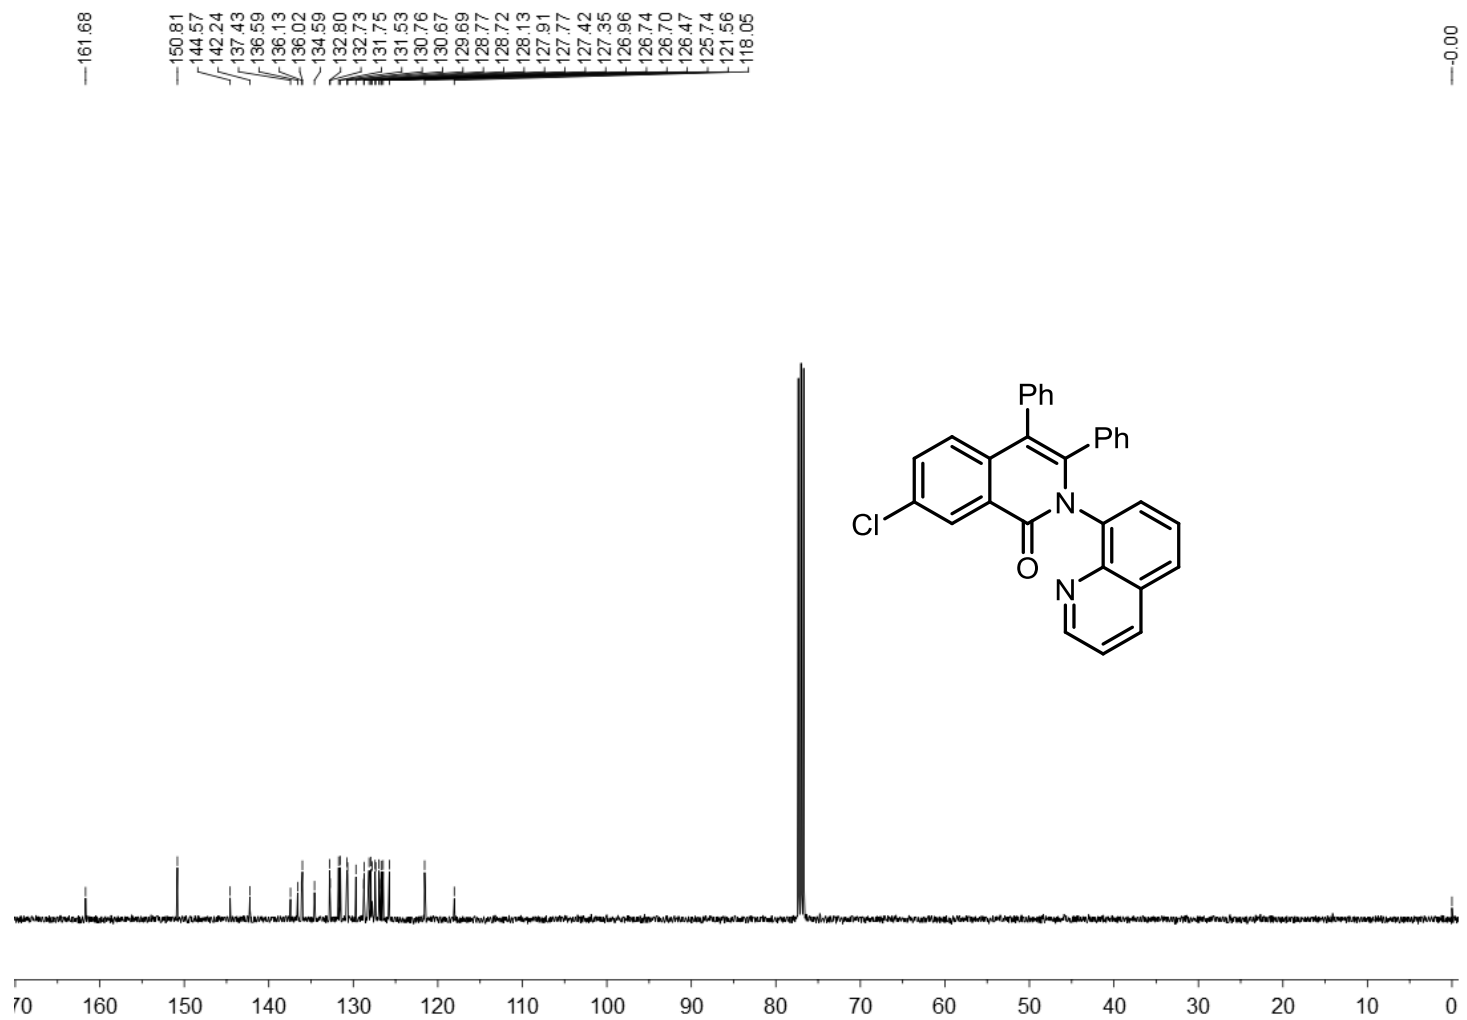

Compound **3fa**

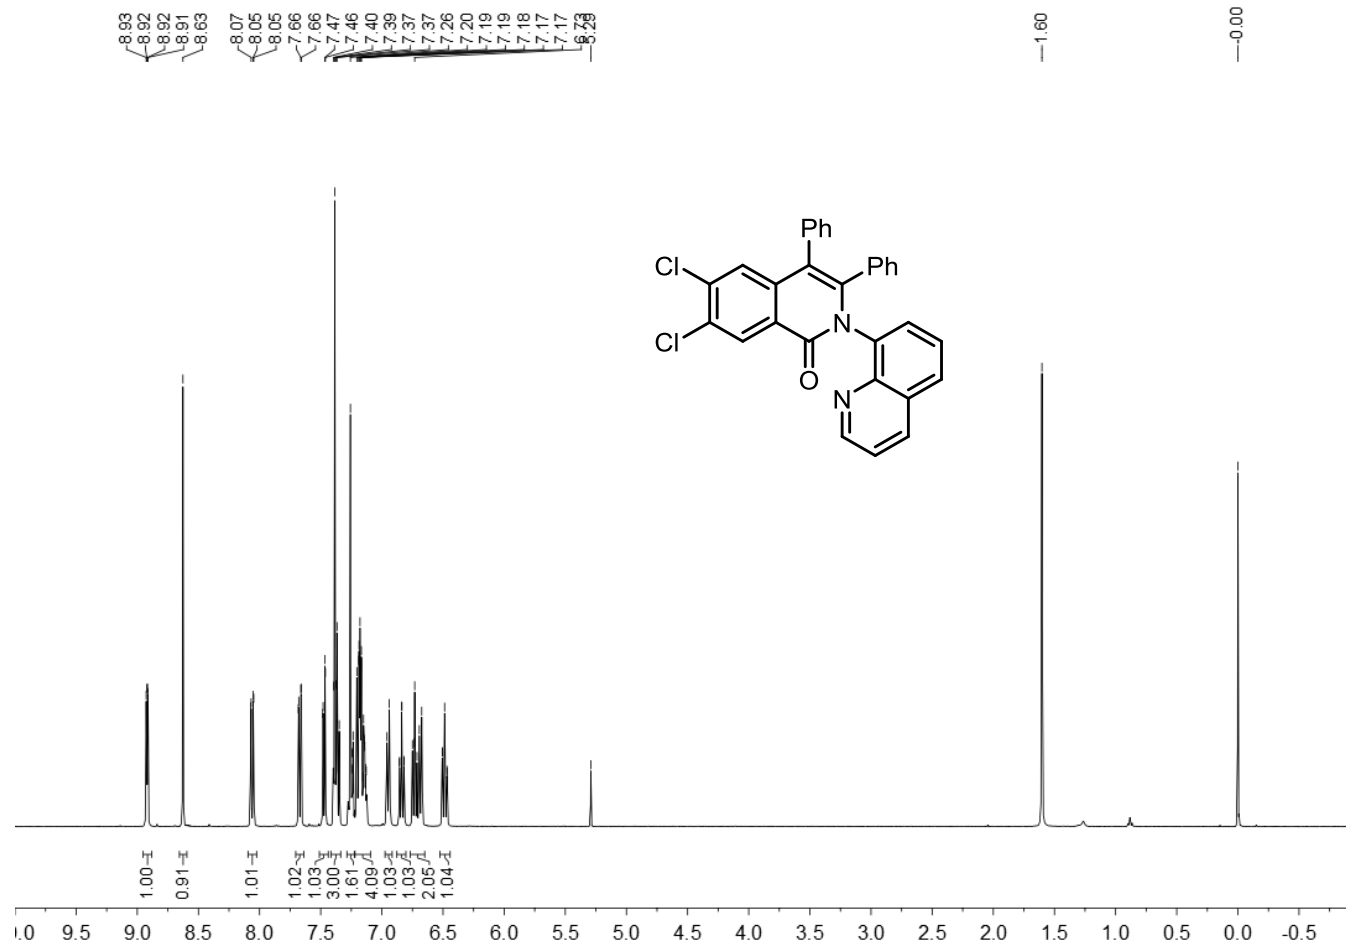

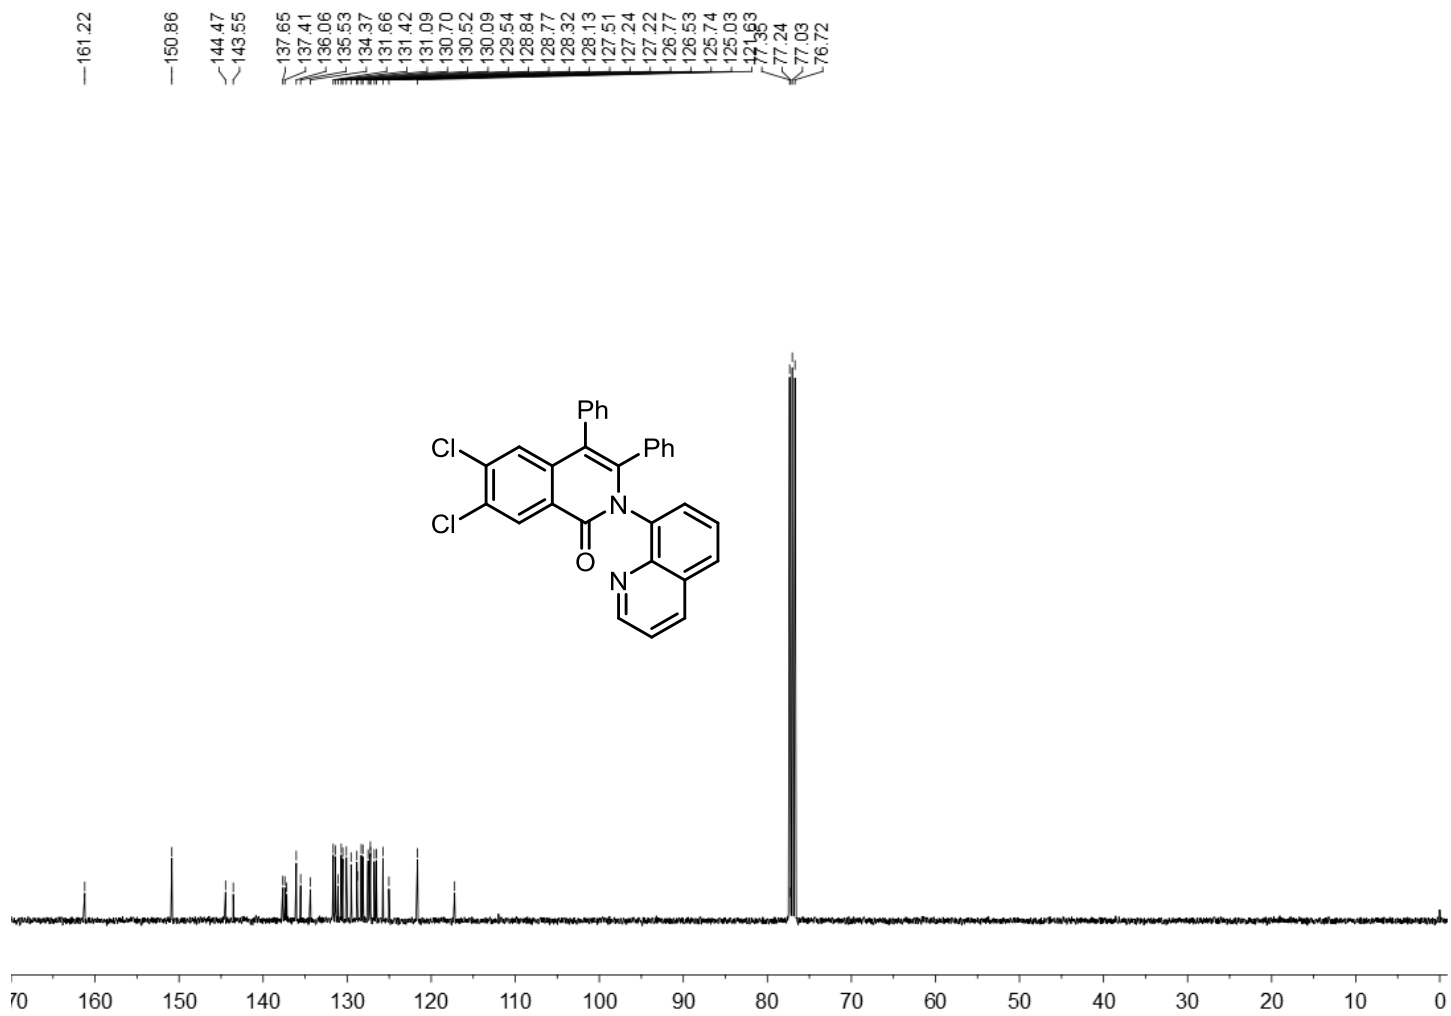

Compound **3ga'**

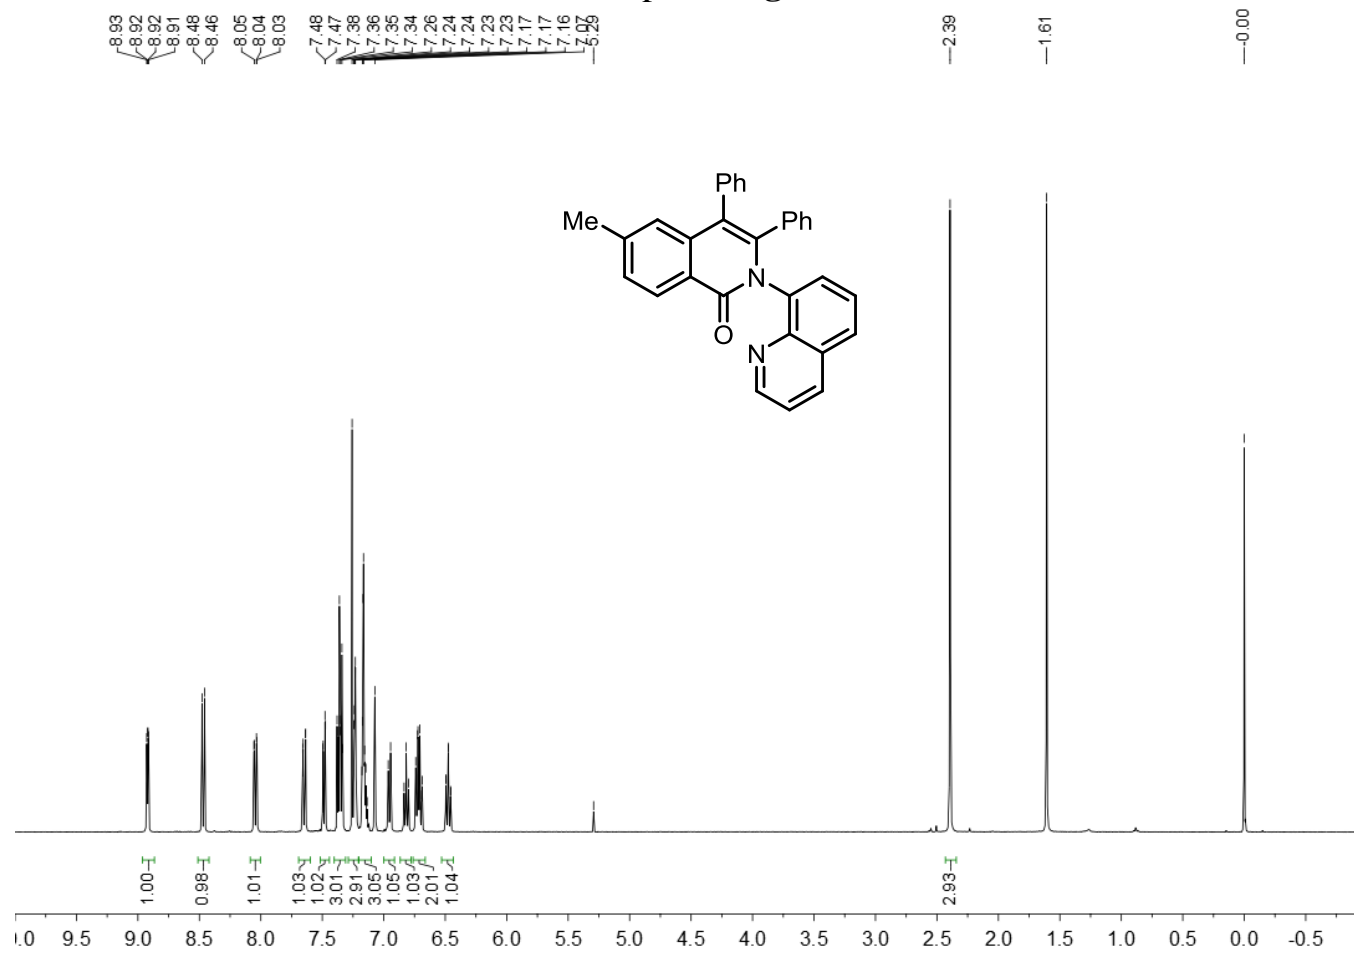

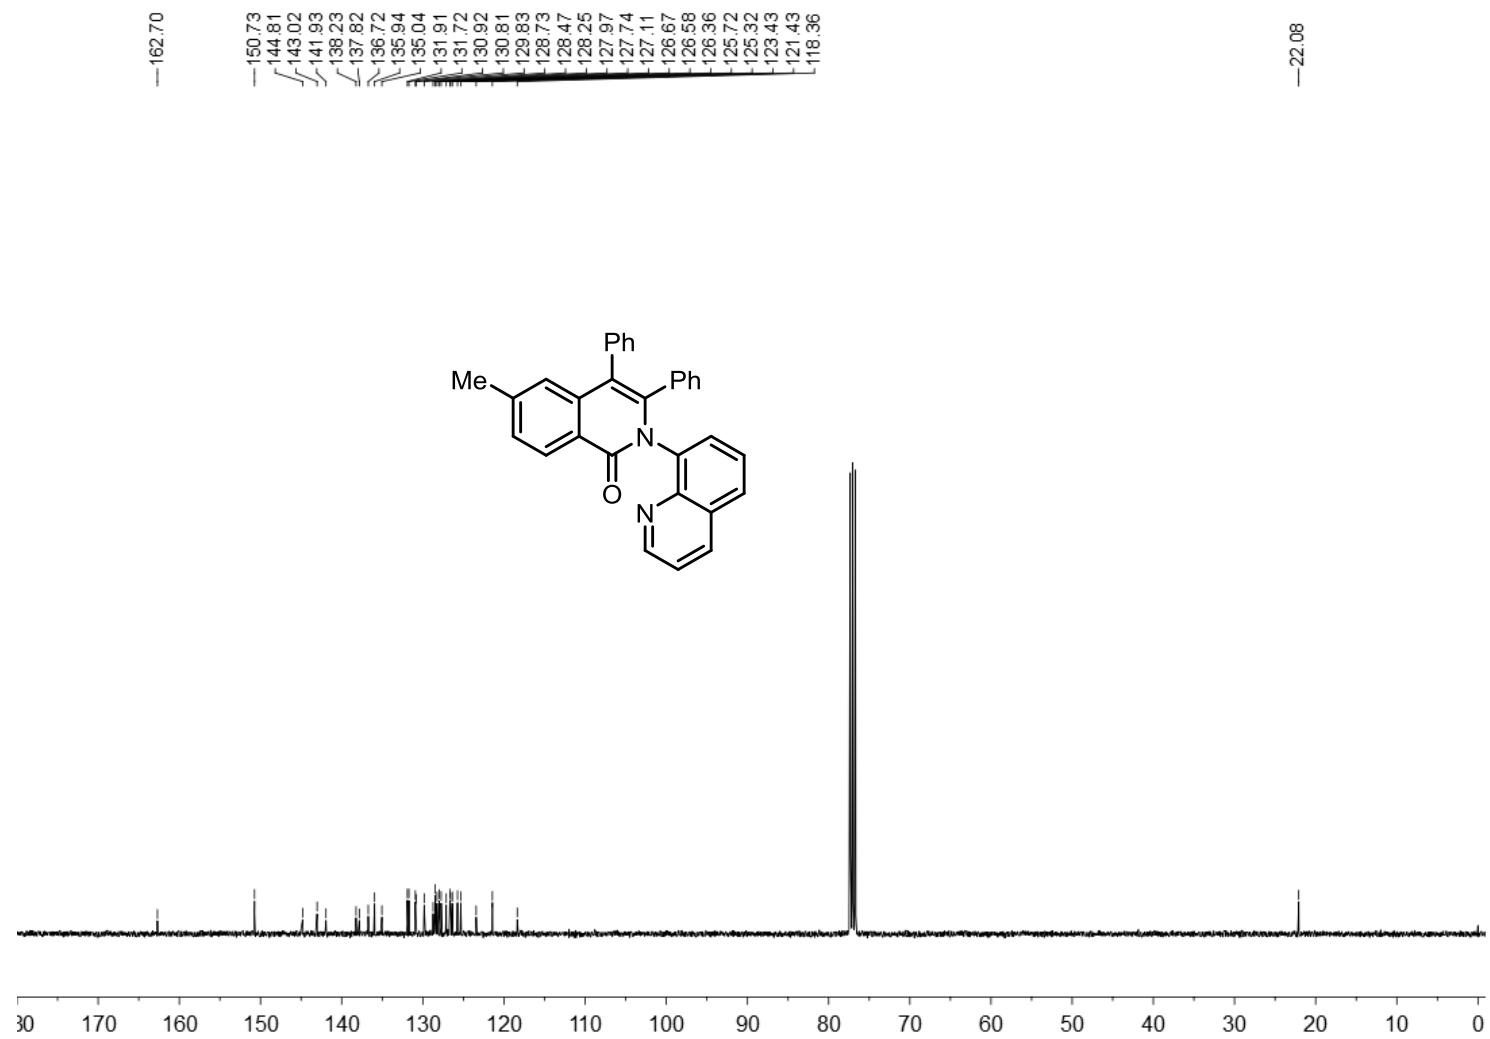



### Compound 3ga

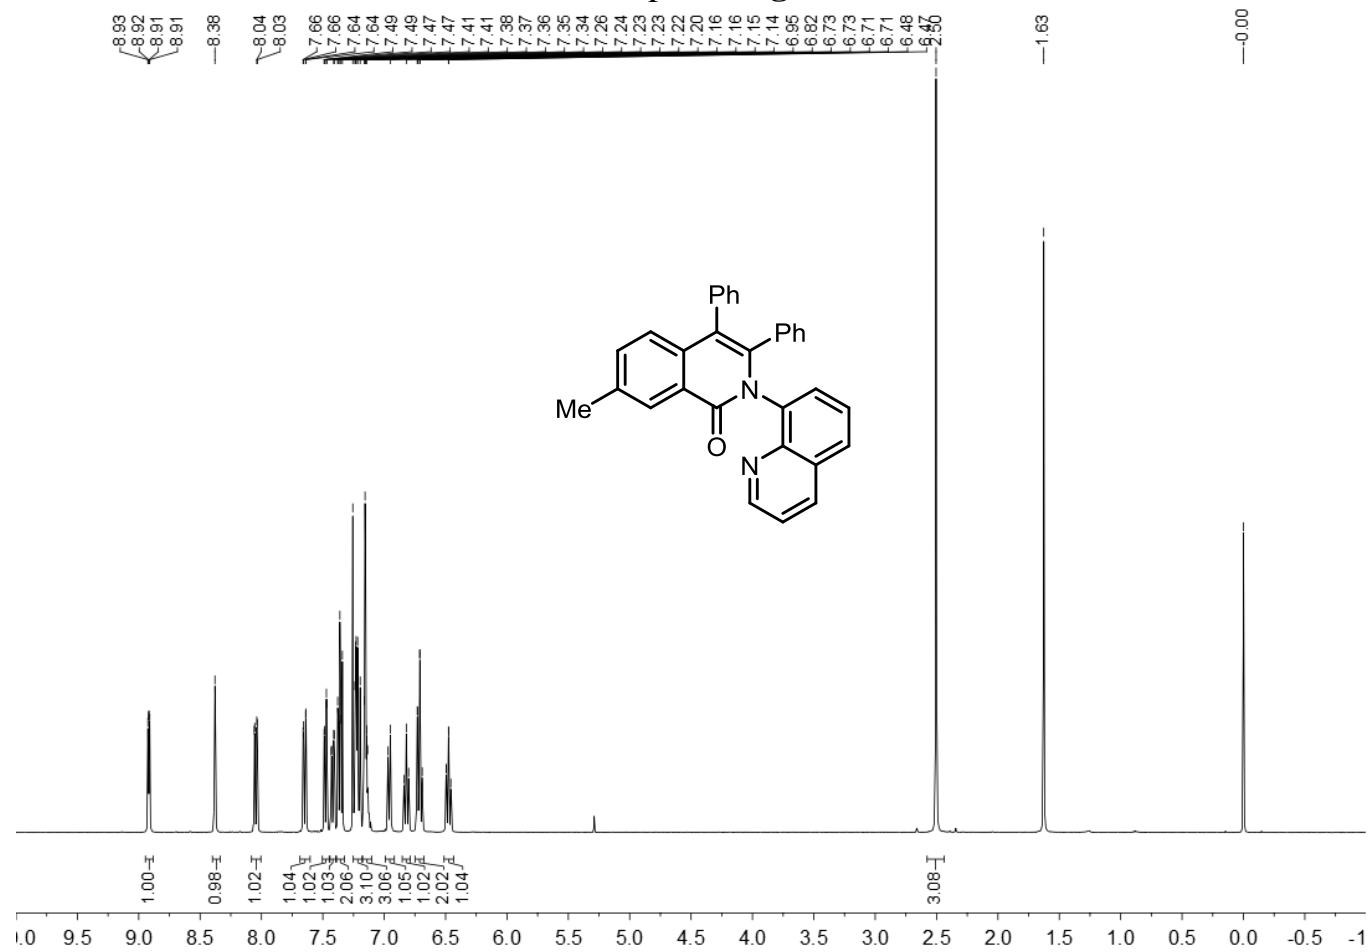

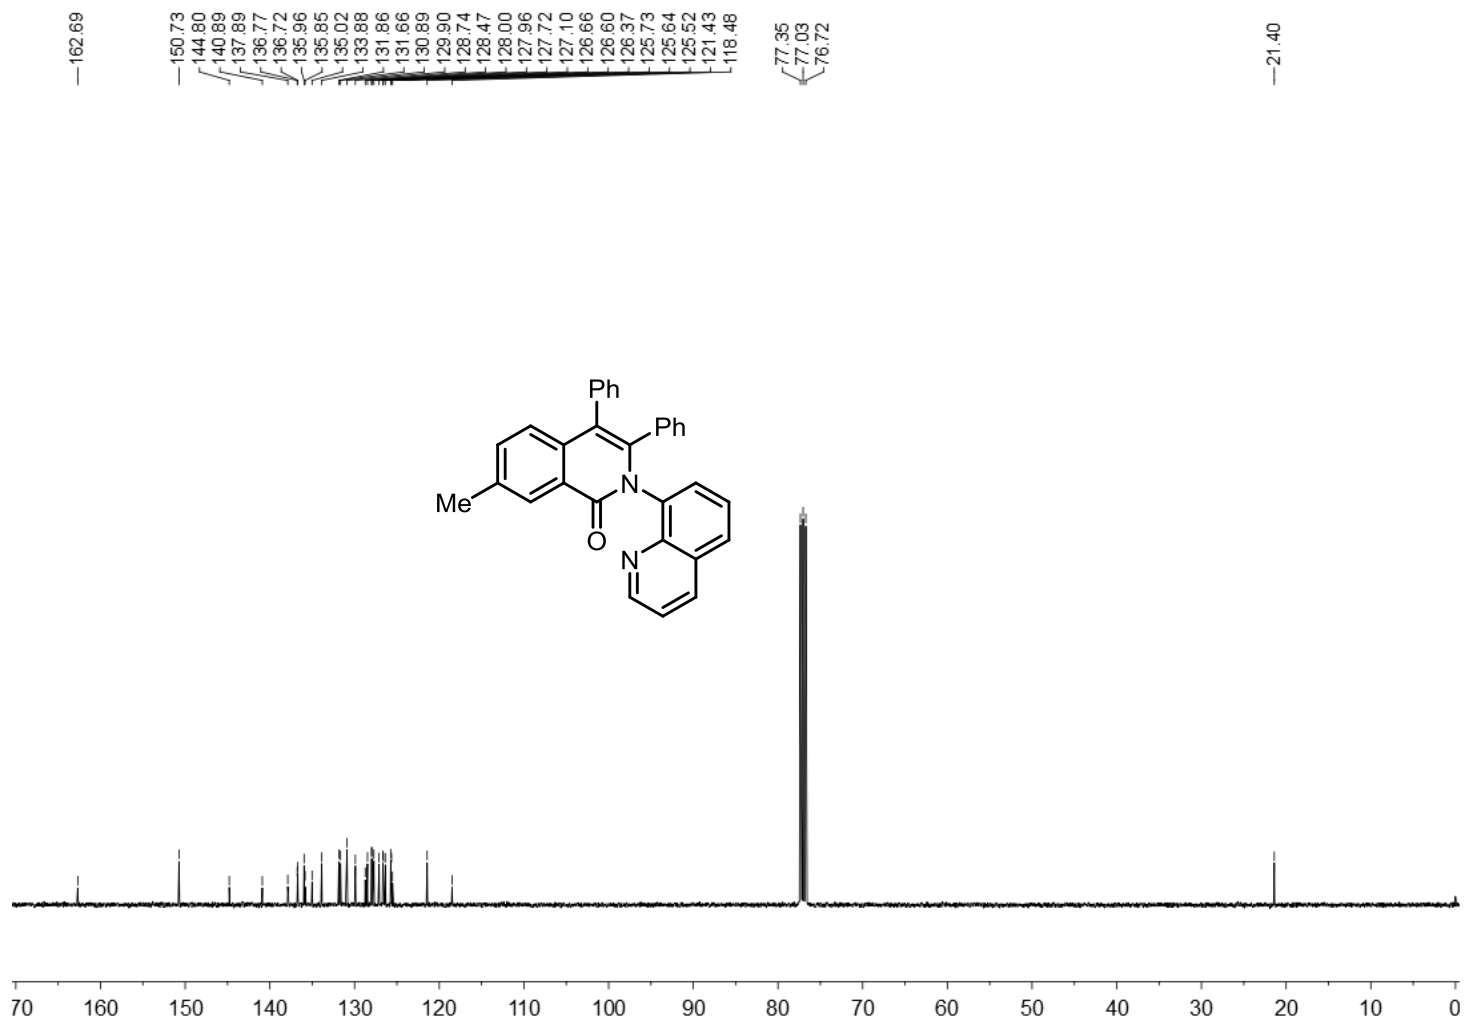

Compound 3ha

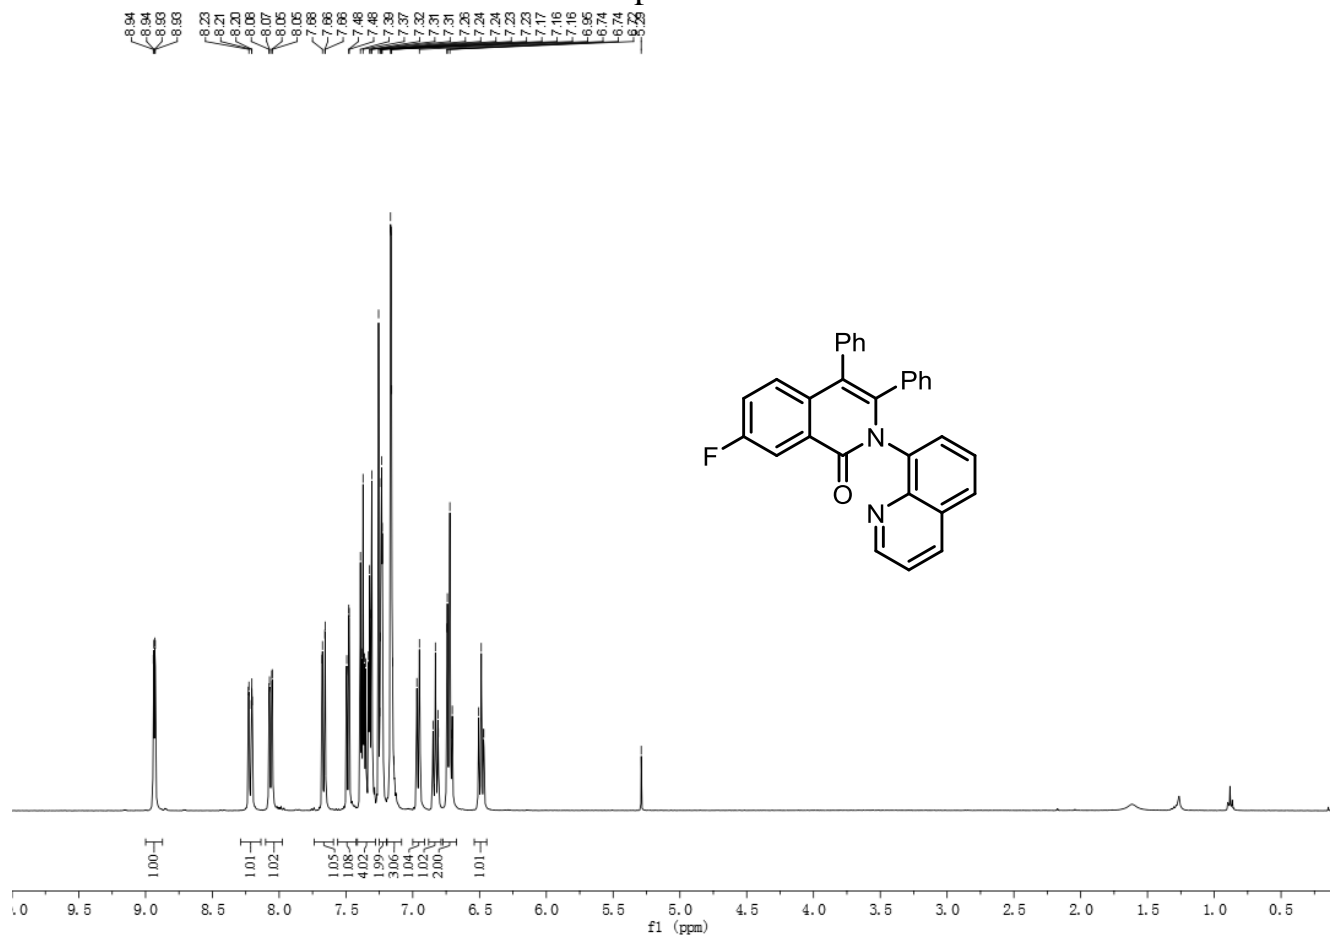

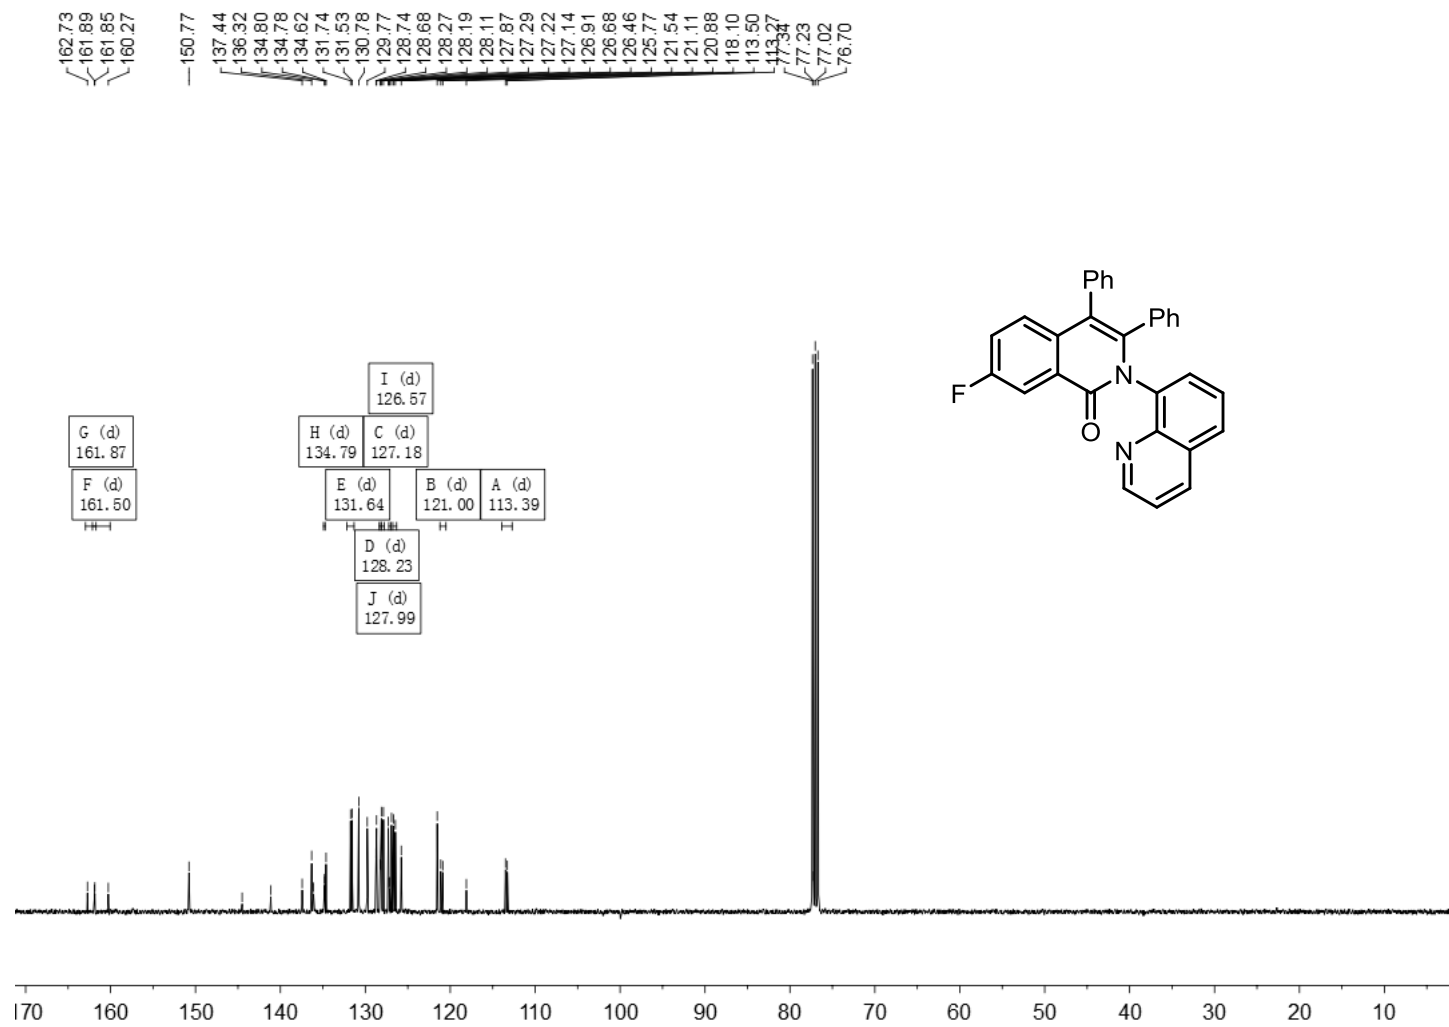

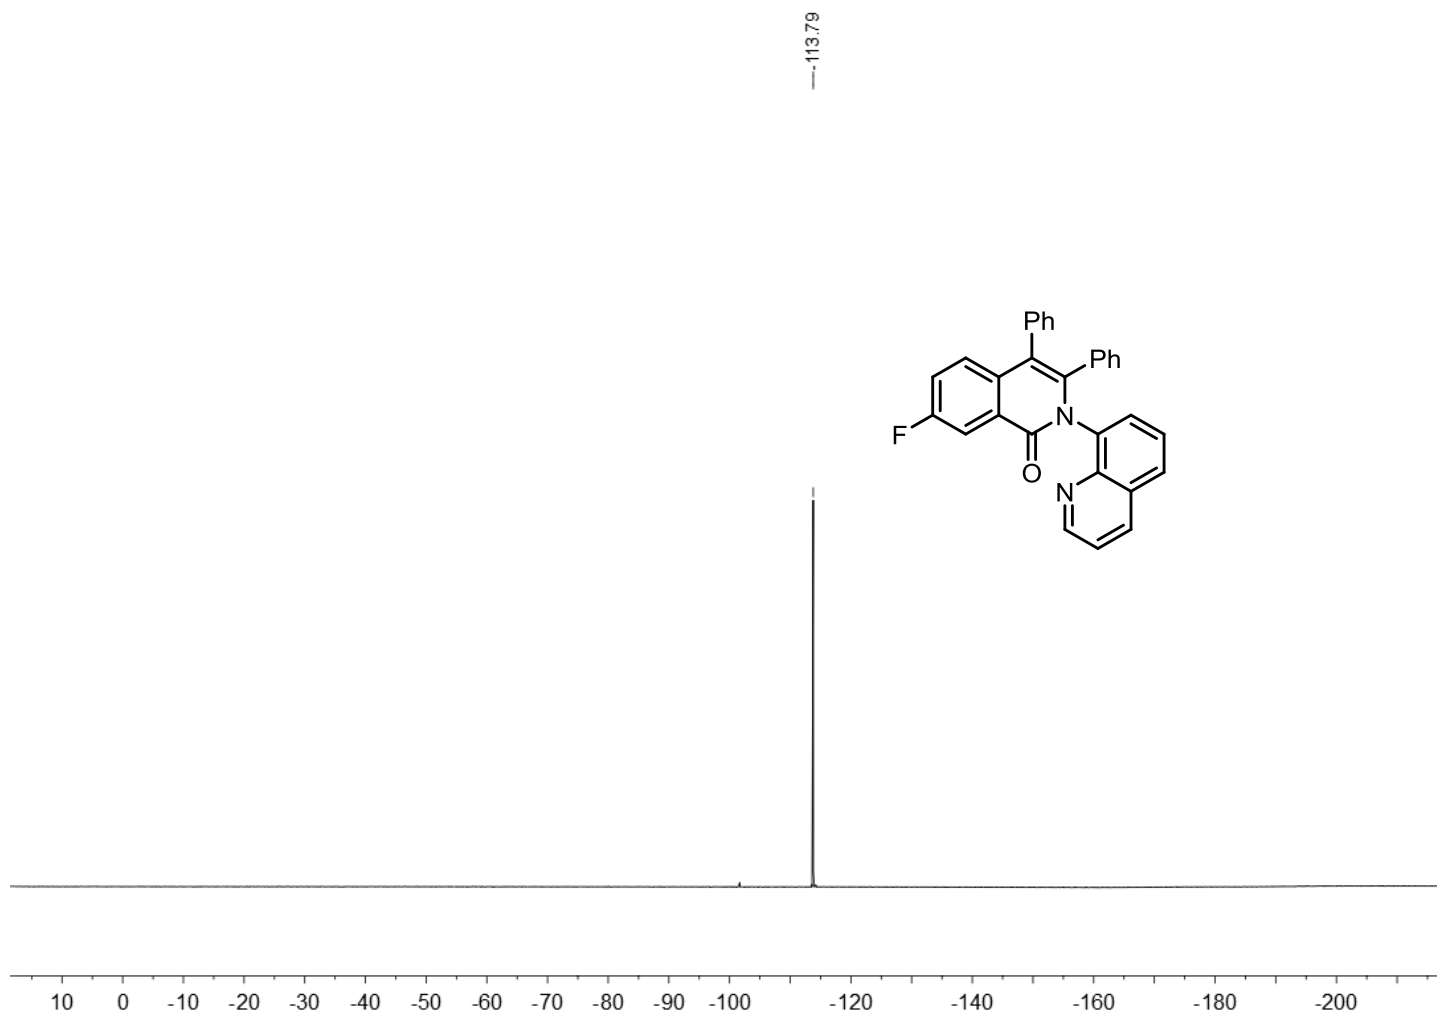

# Compound 3ha'

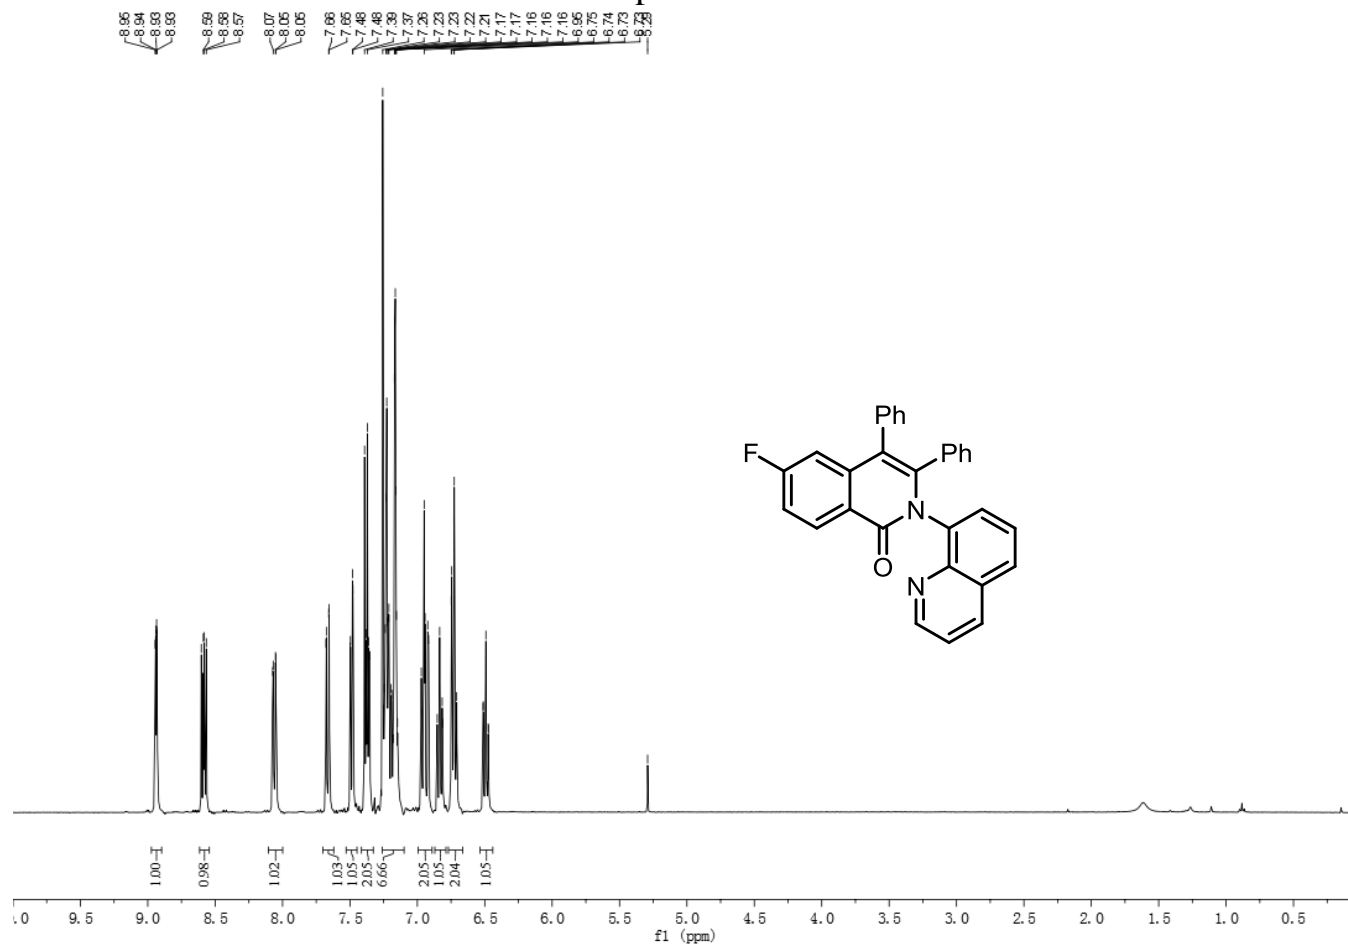

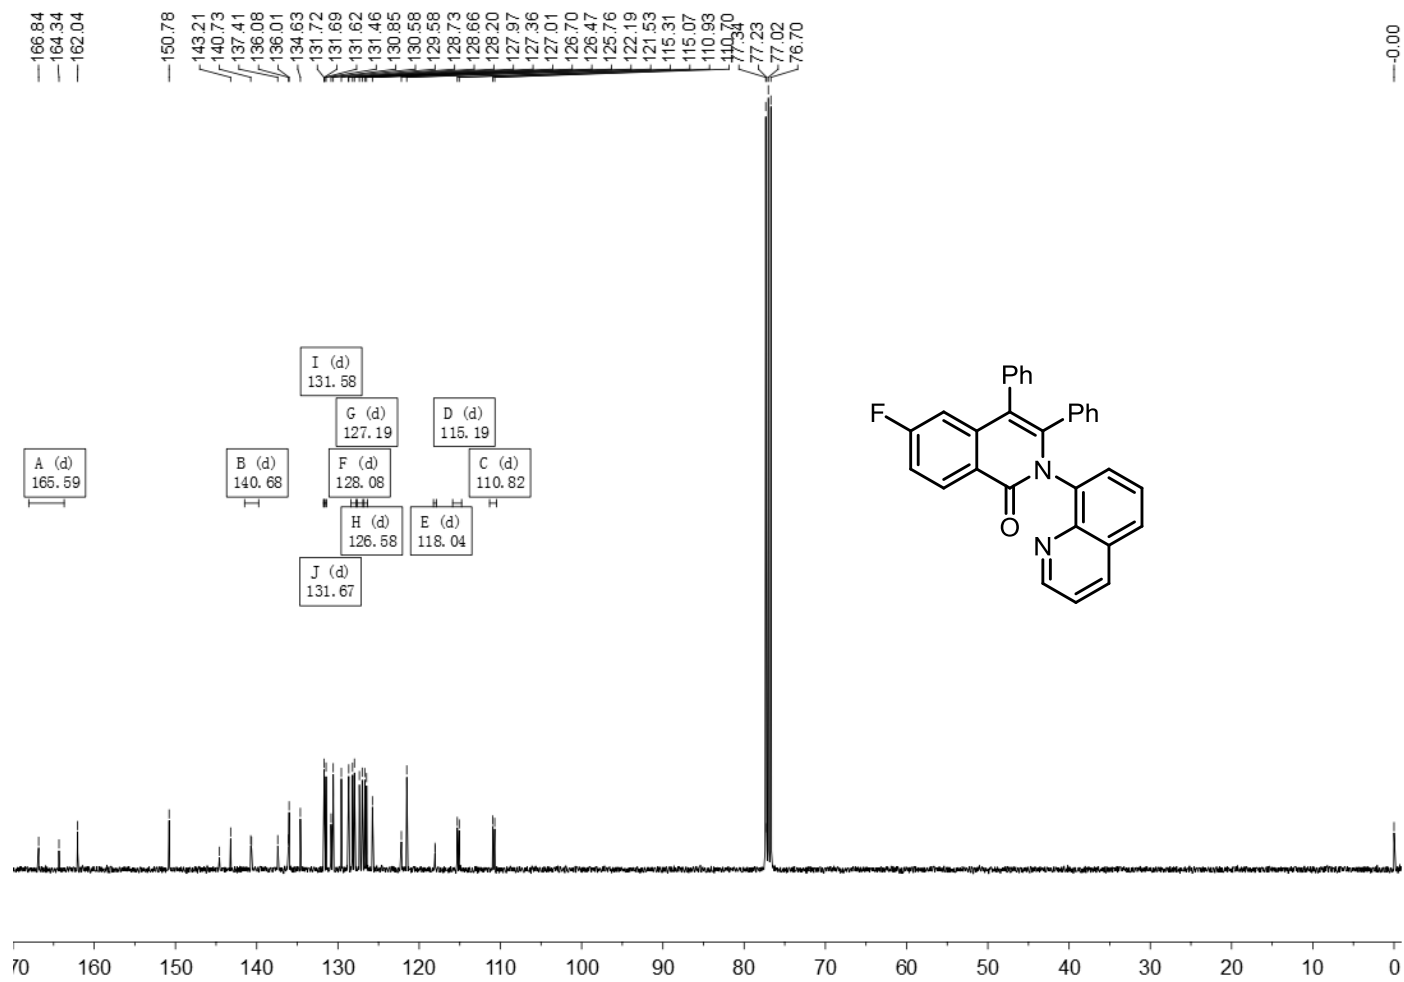

# Compound 3ia

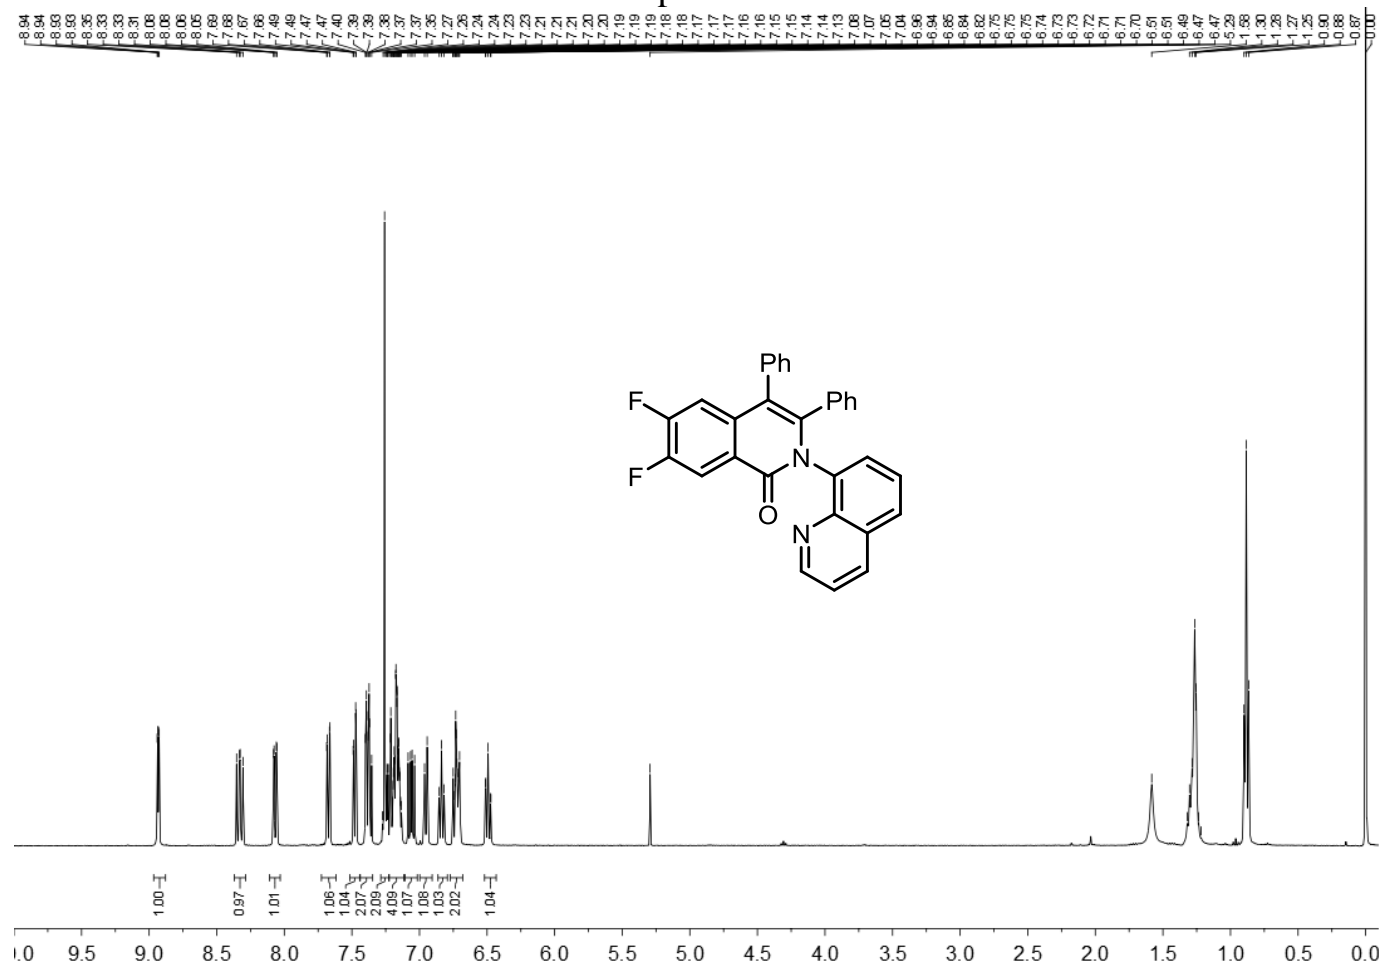



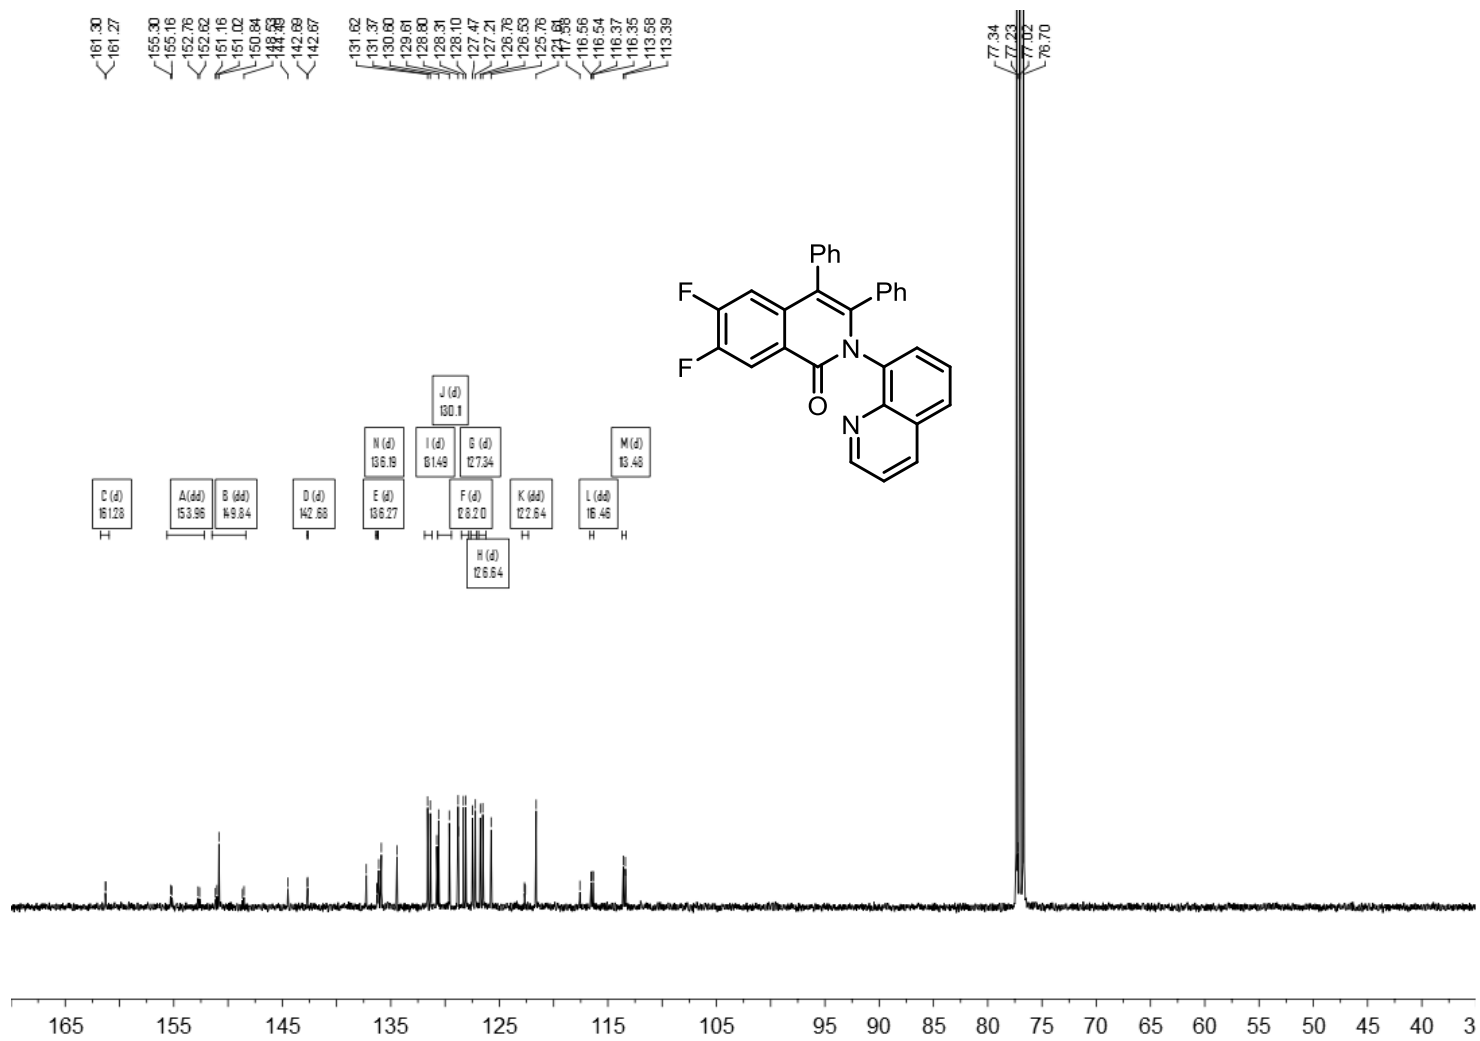

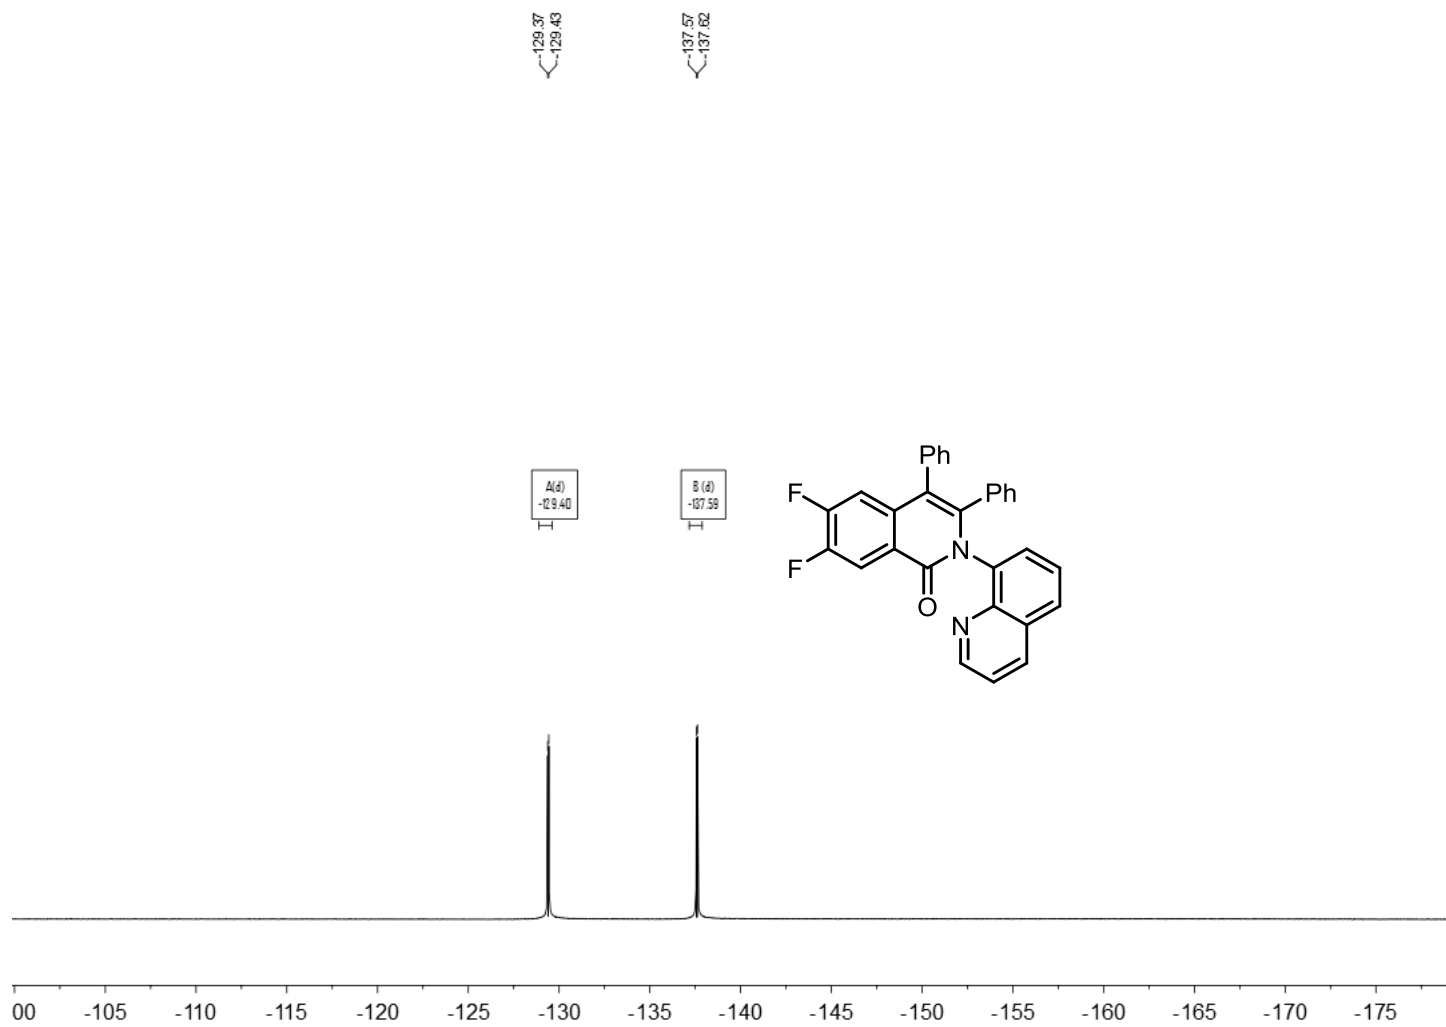

# Compound 3ab

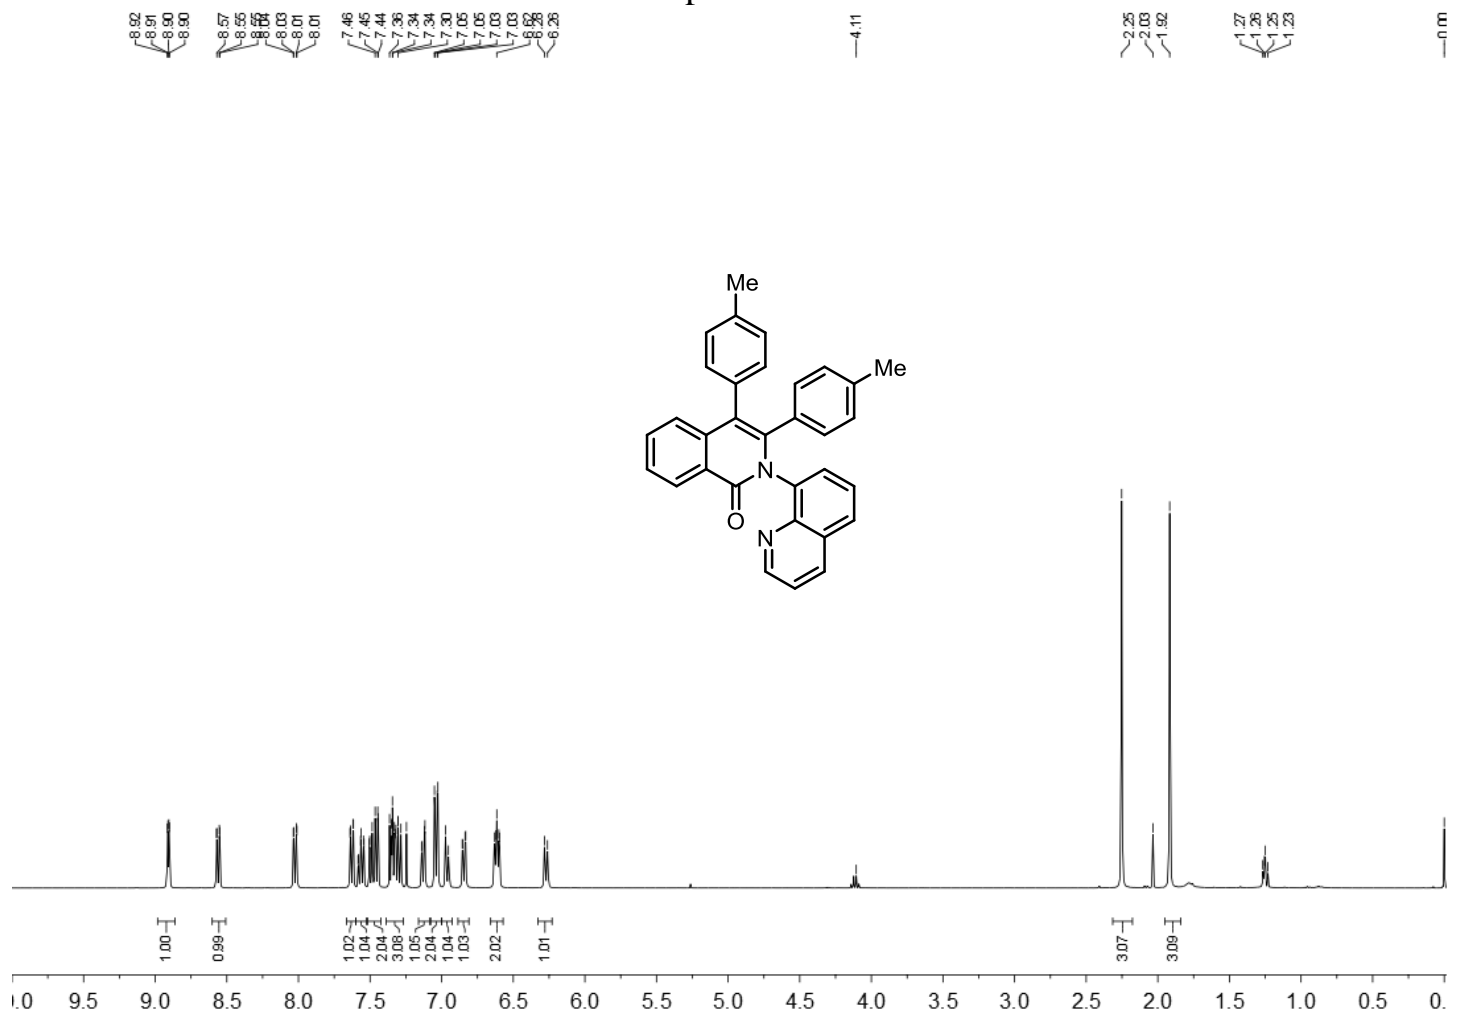

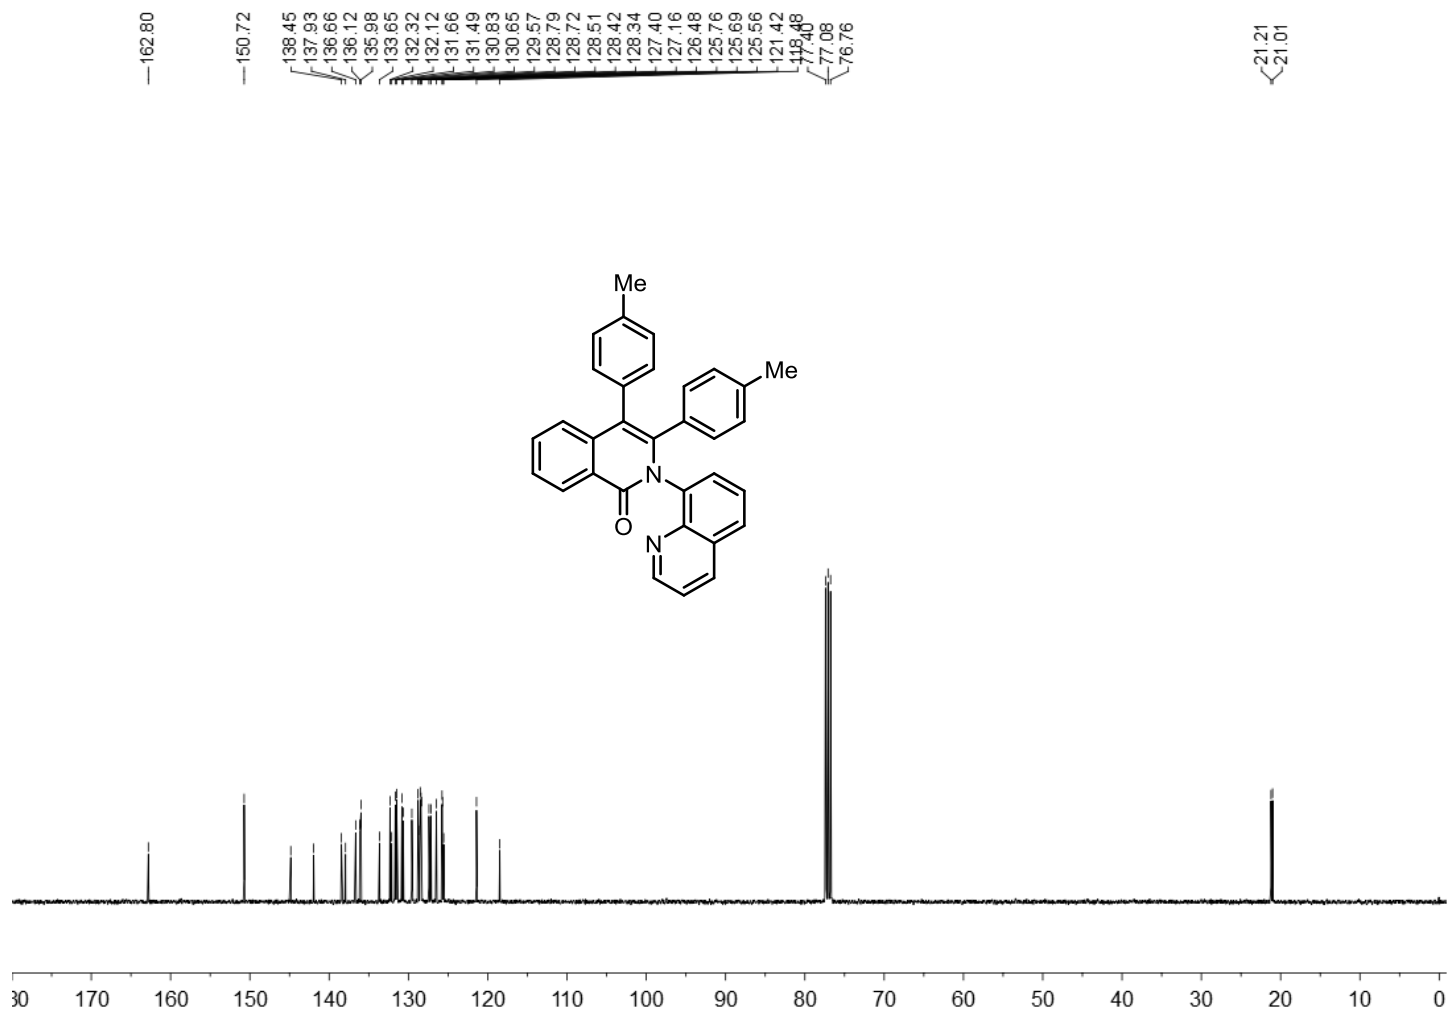

# Compound 3ac

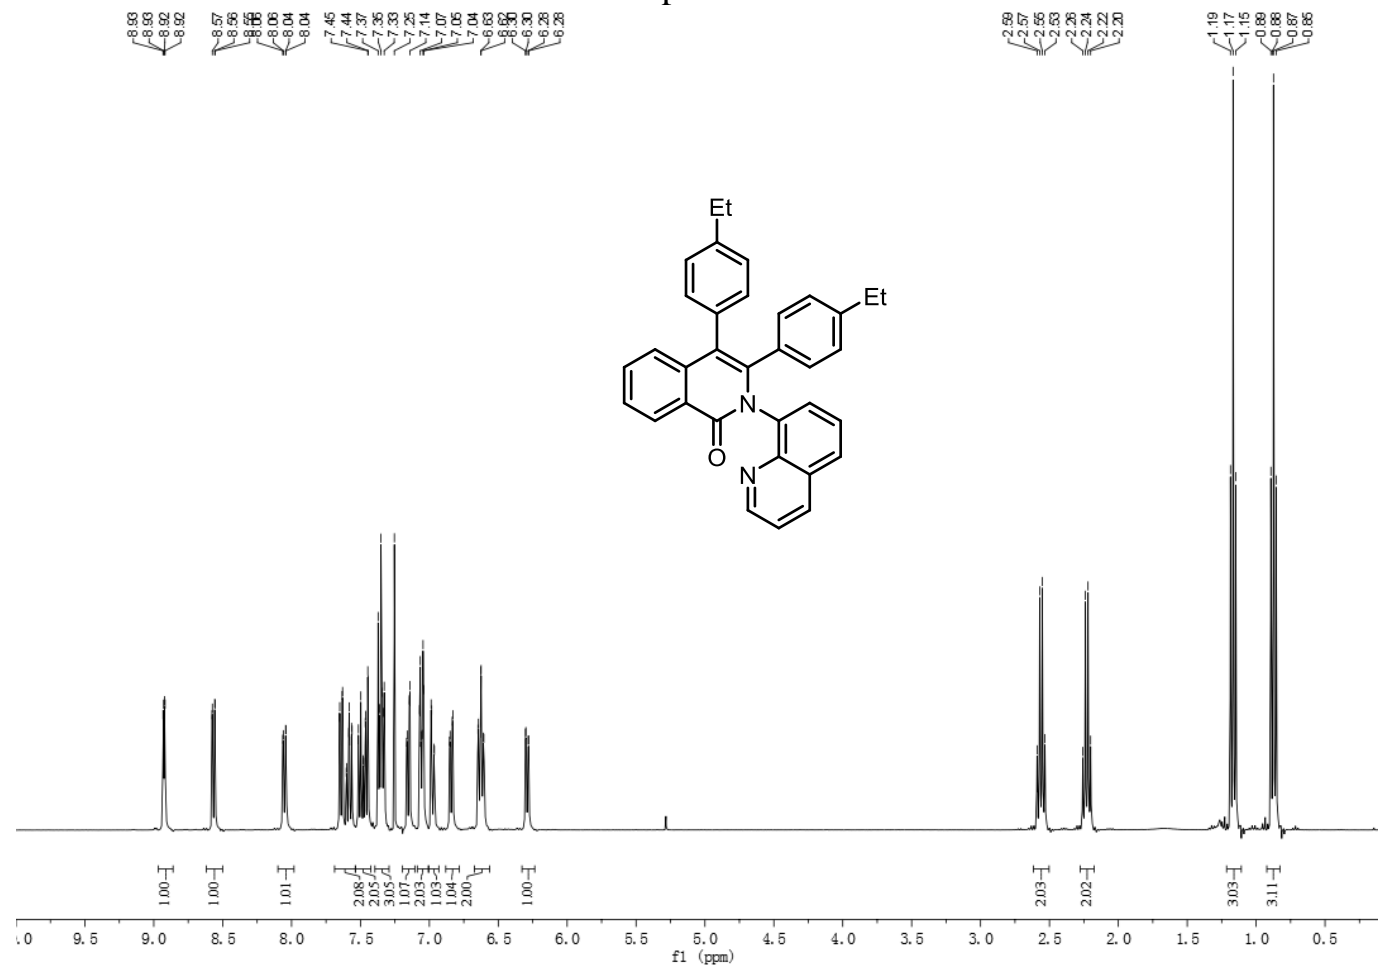

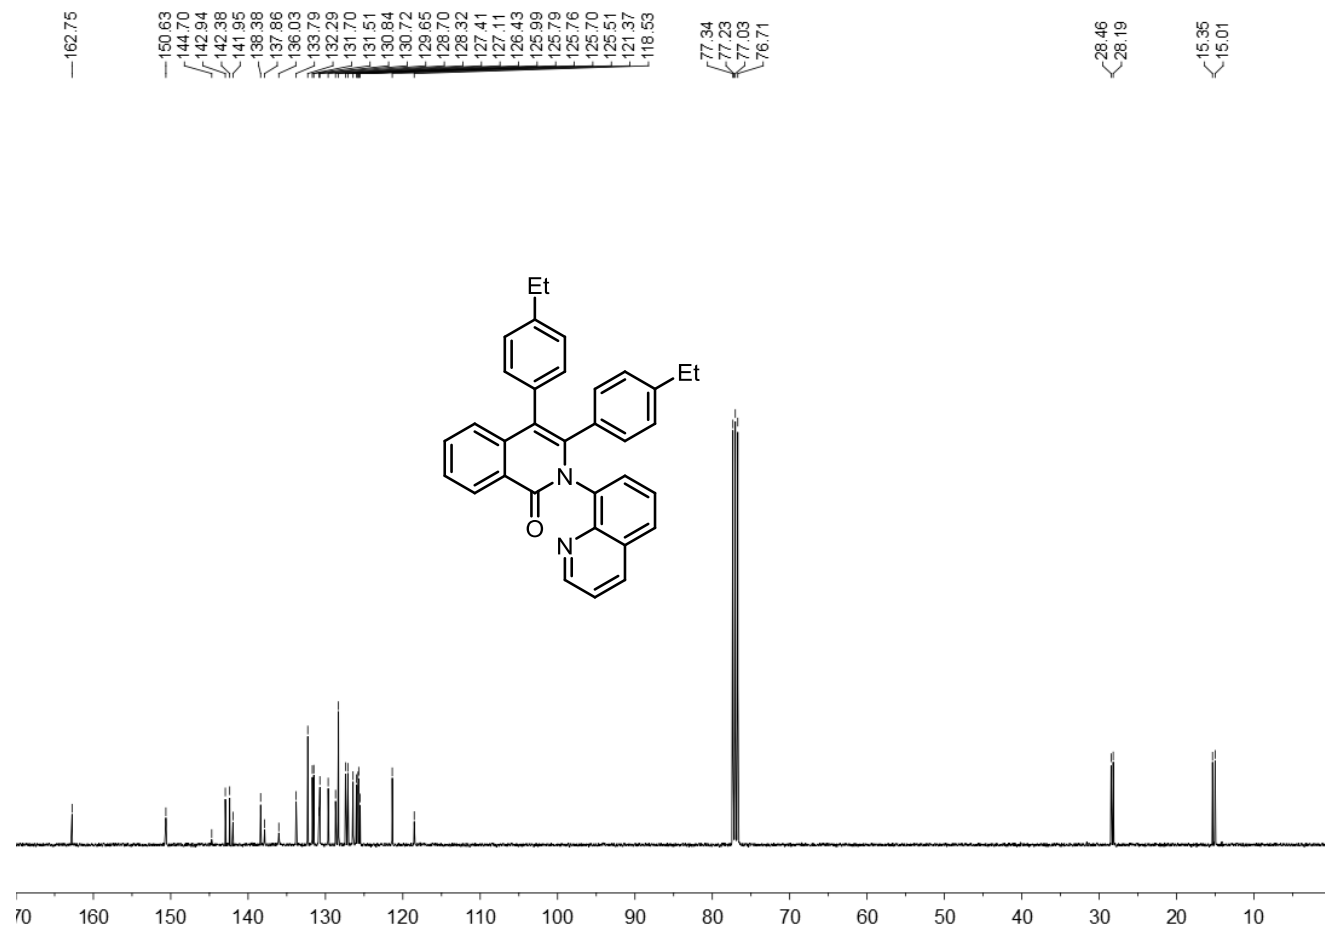

# Compound 3ad

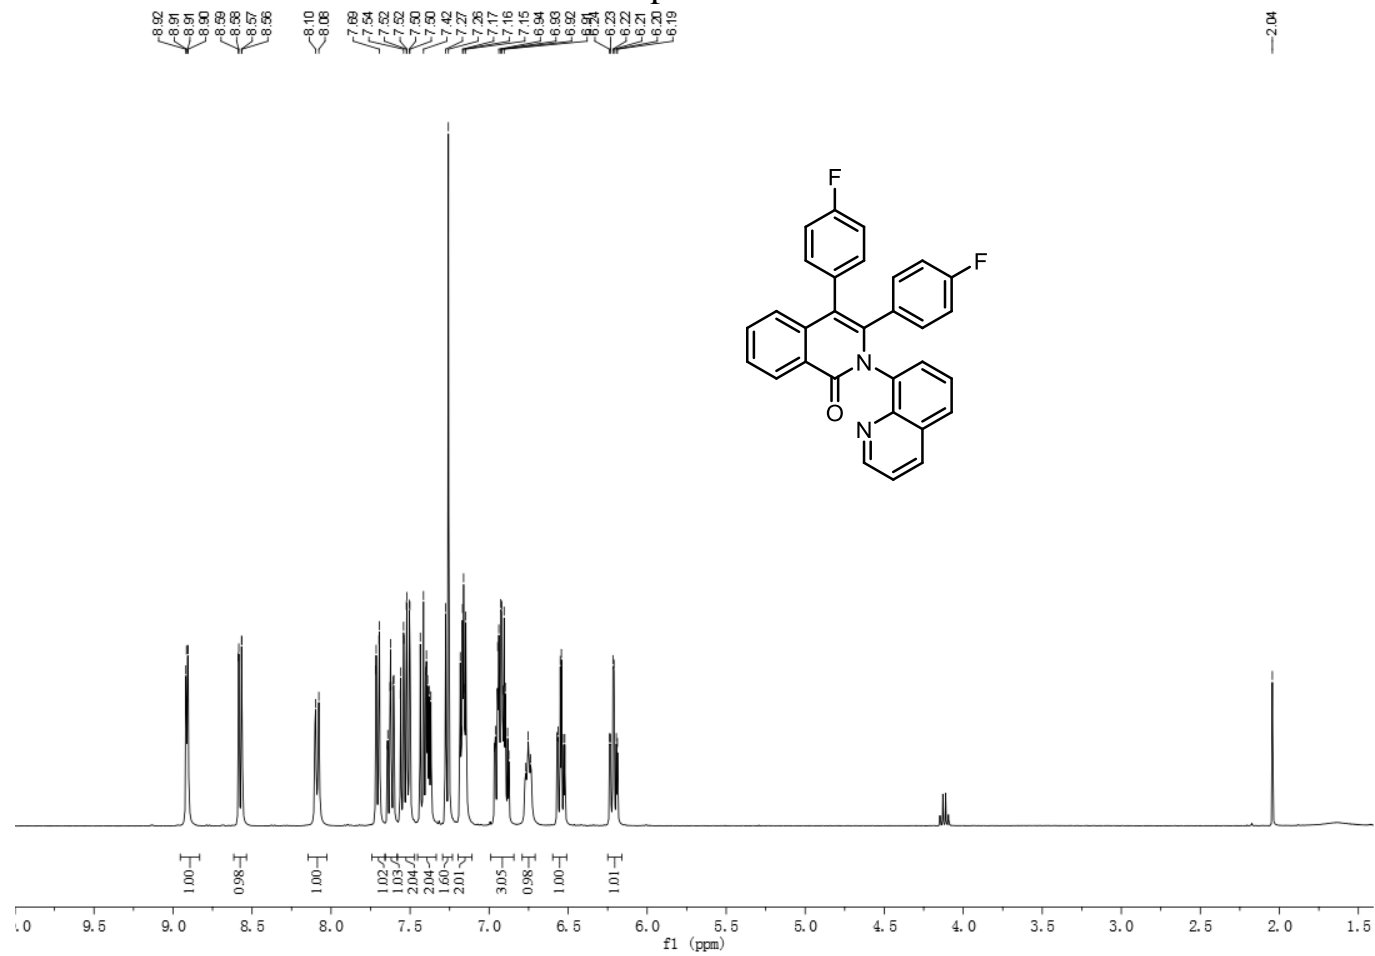

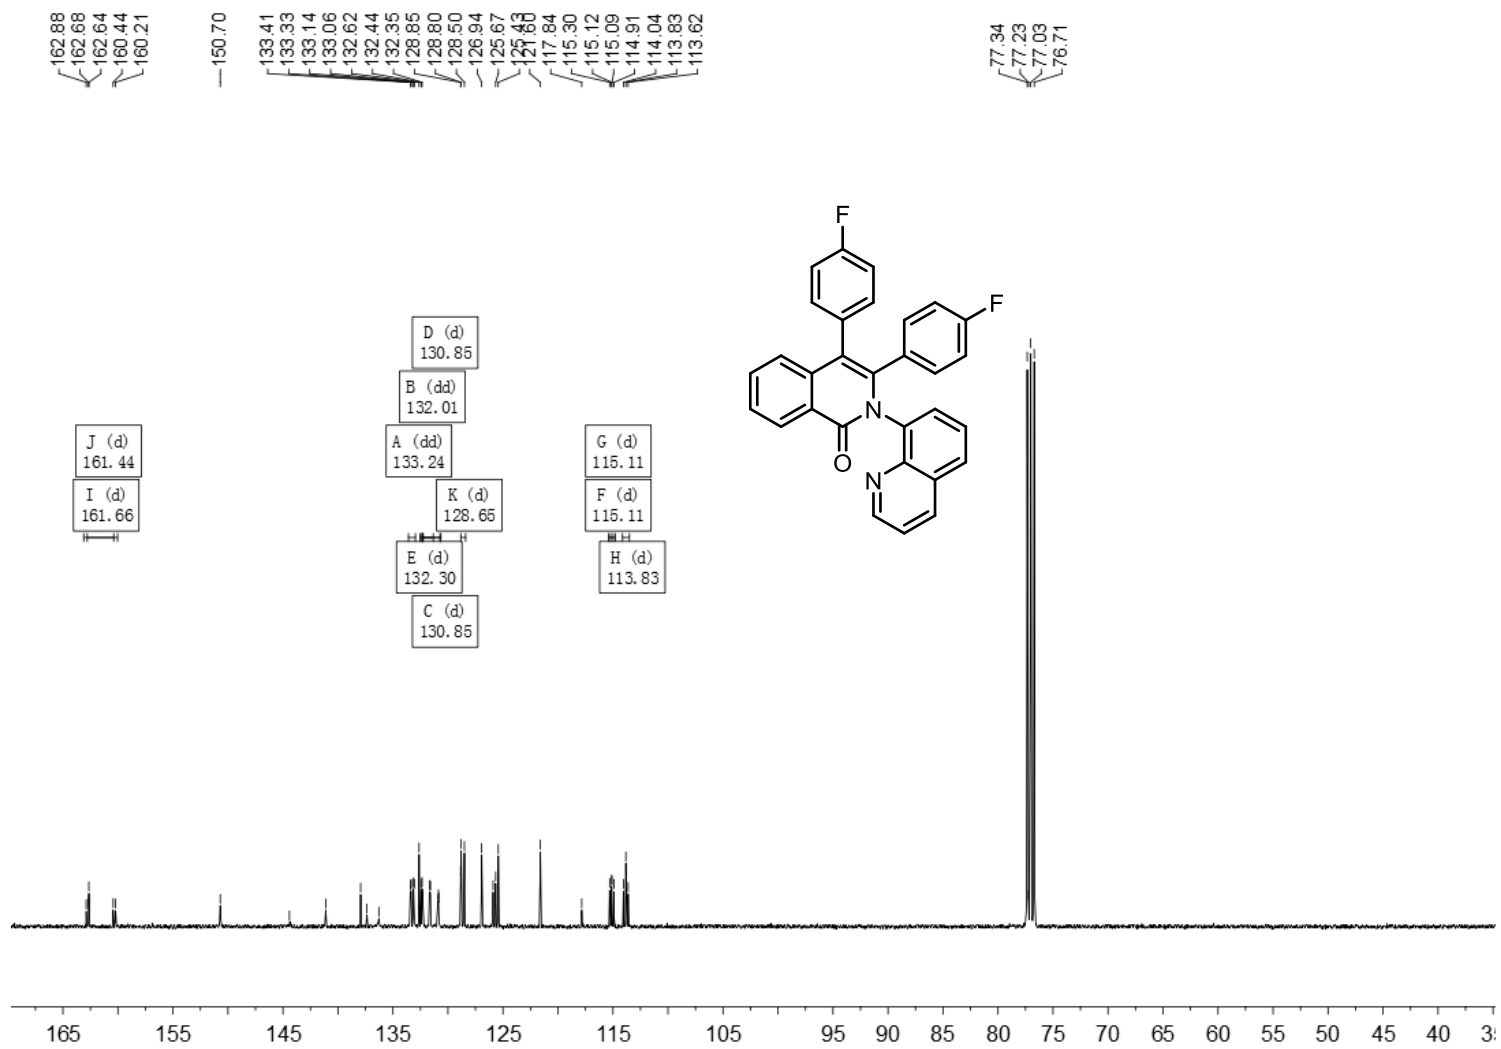



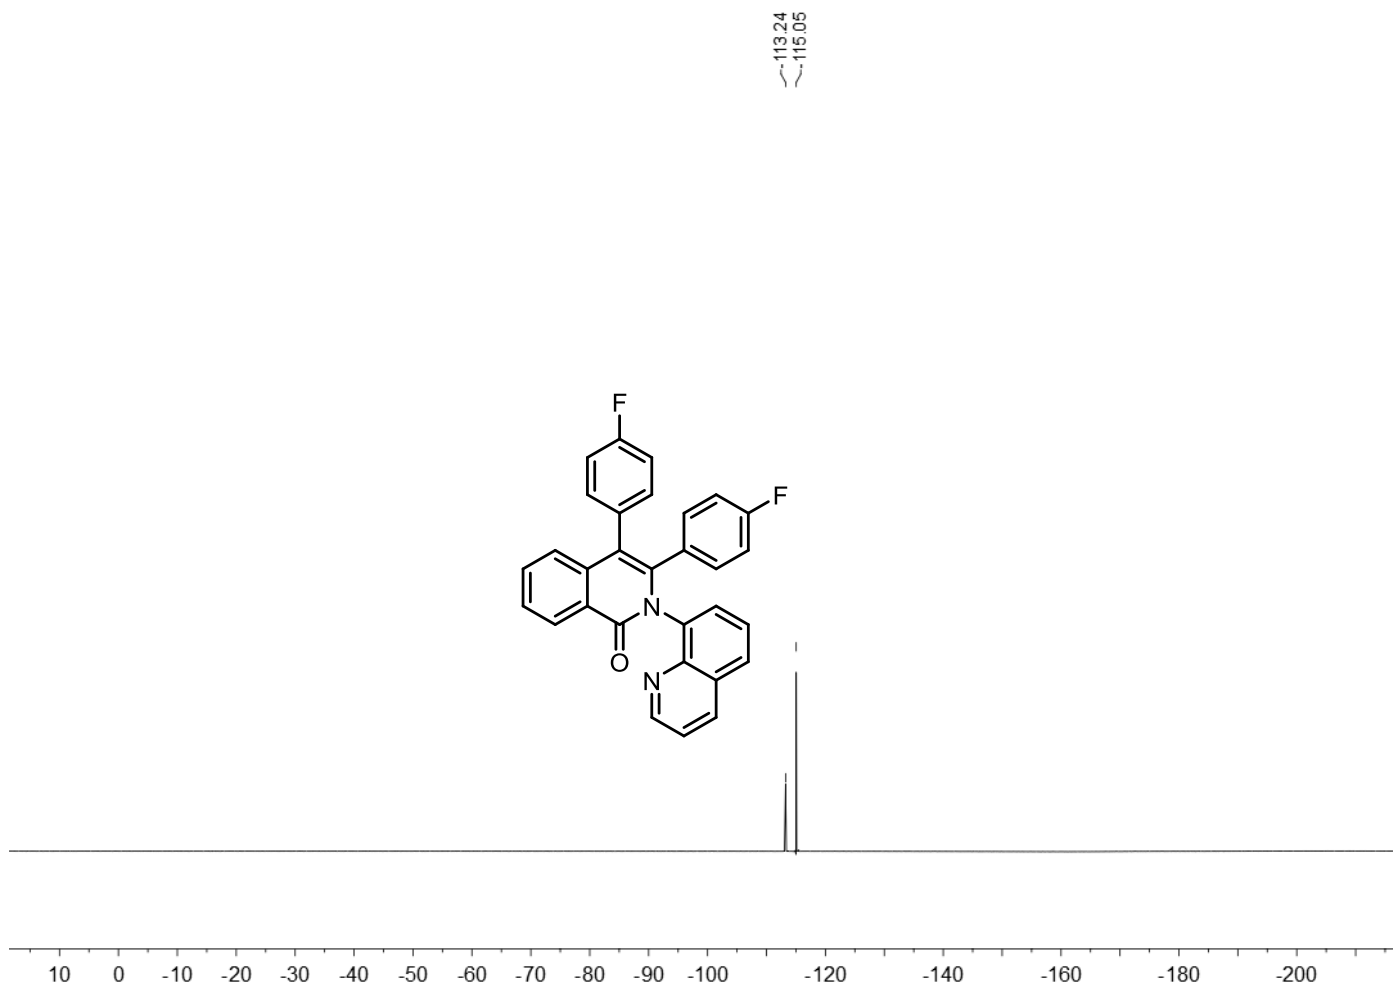

# Compound 3ae

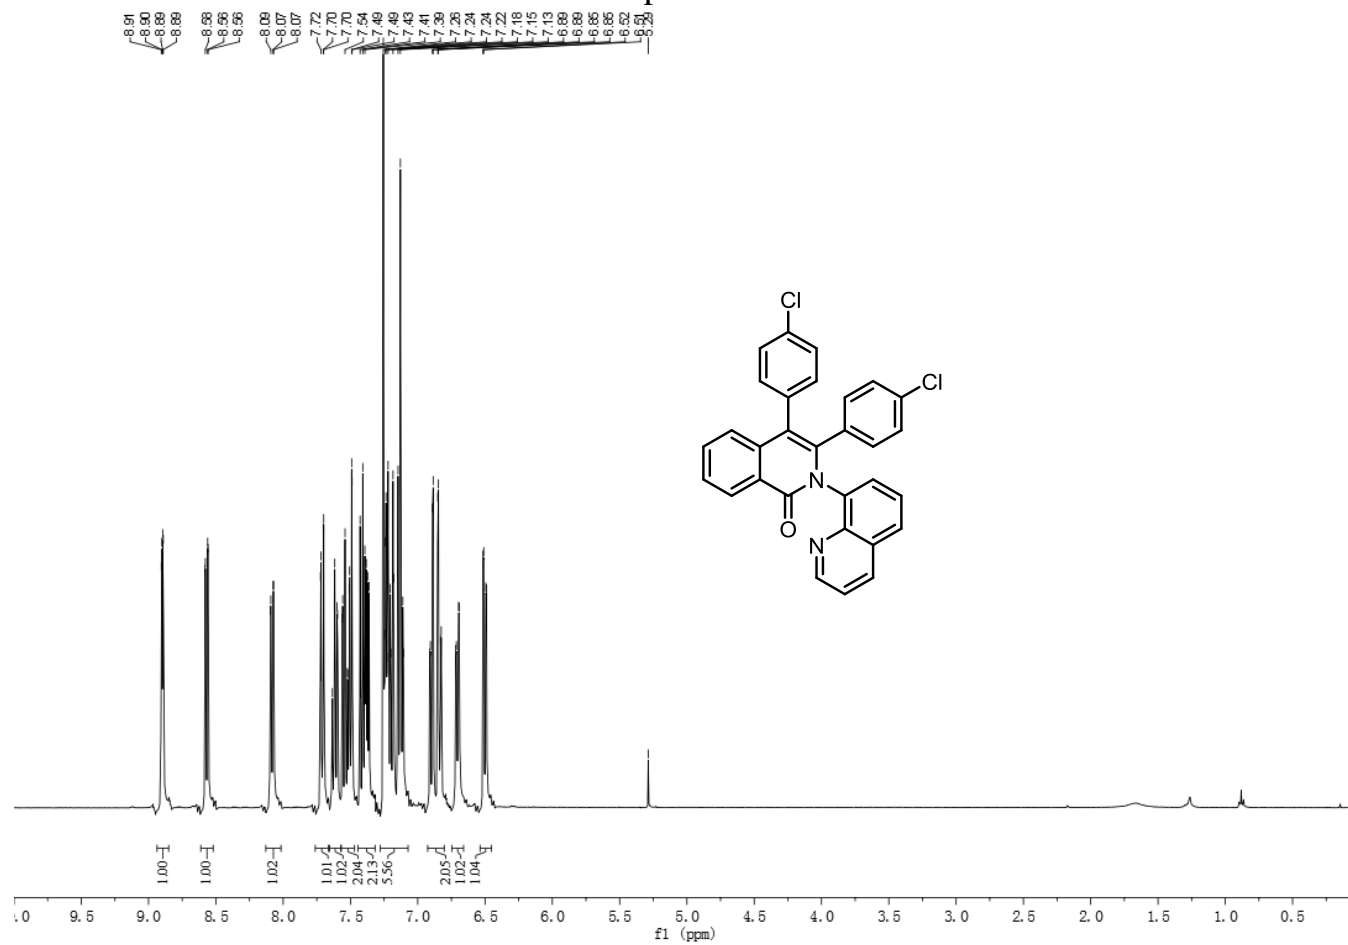

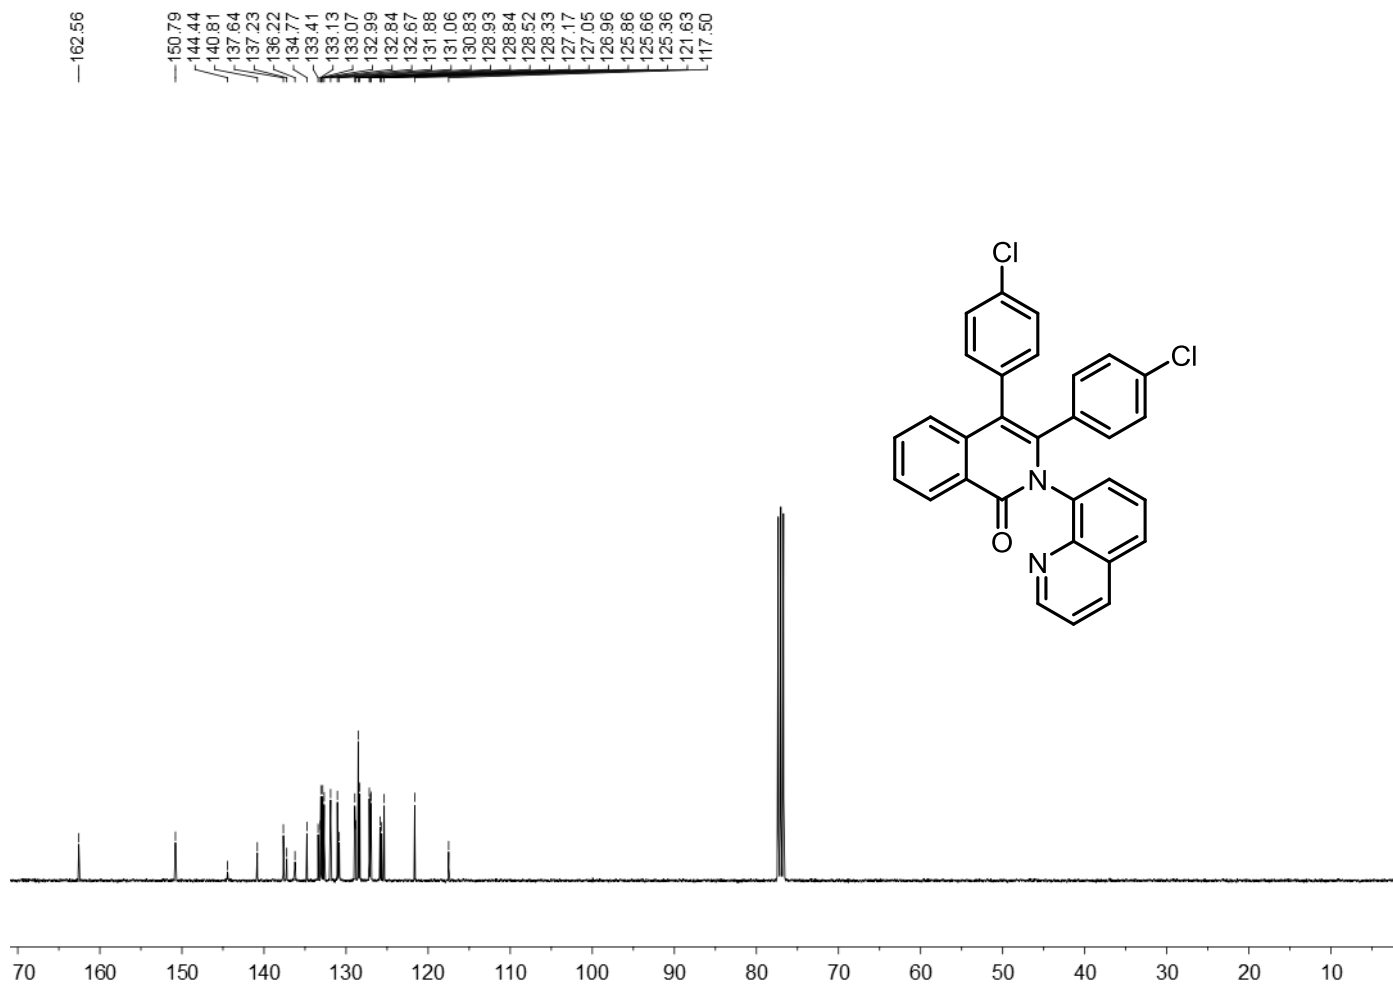

# Compound 3af

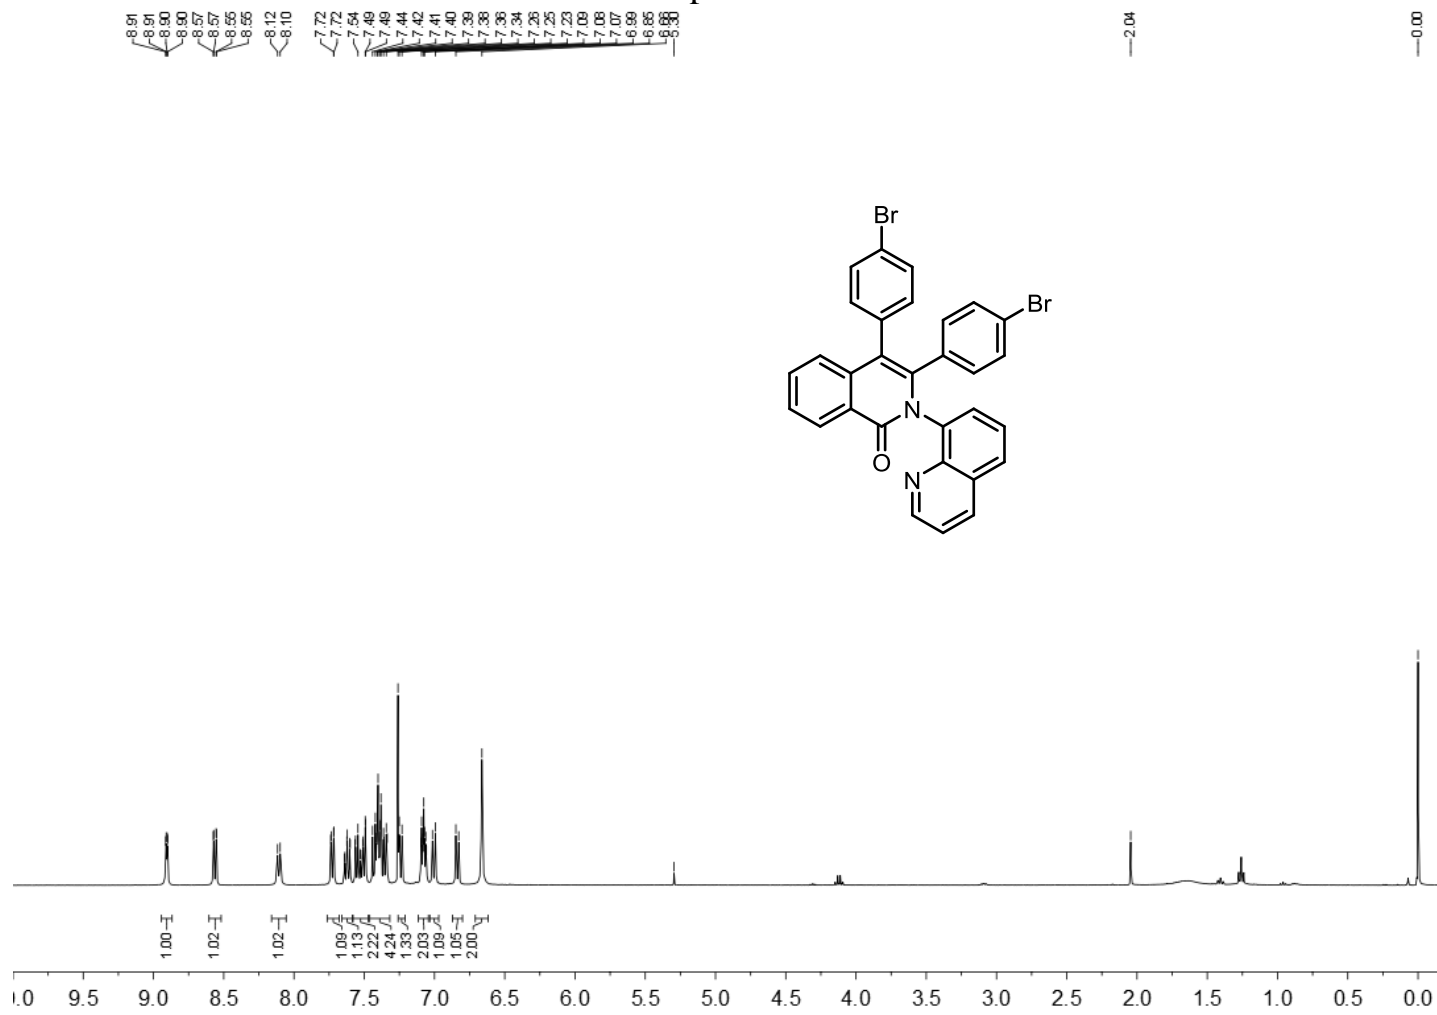

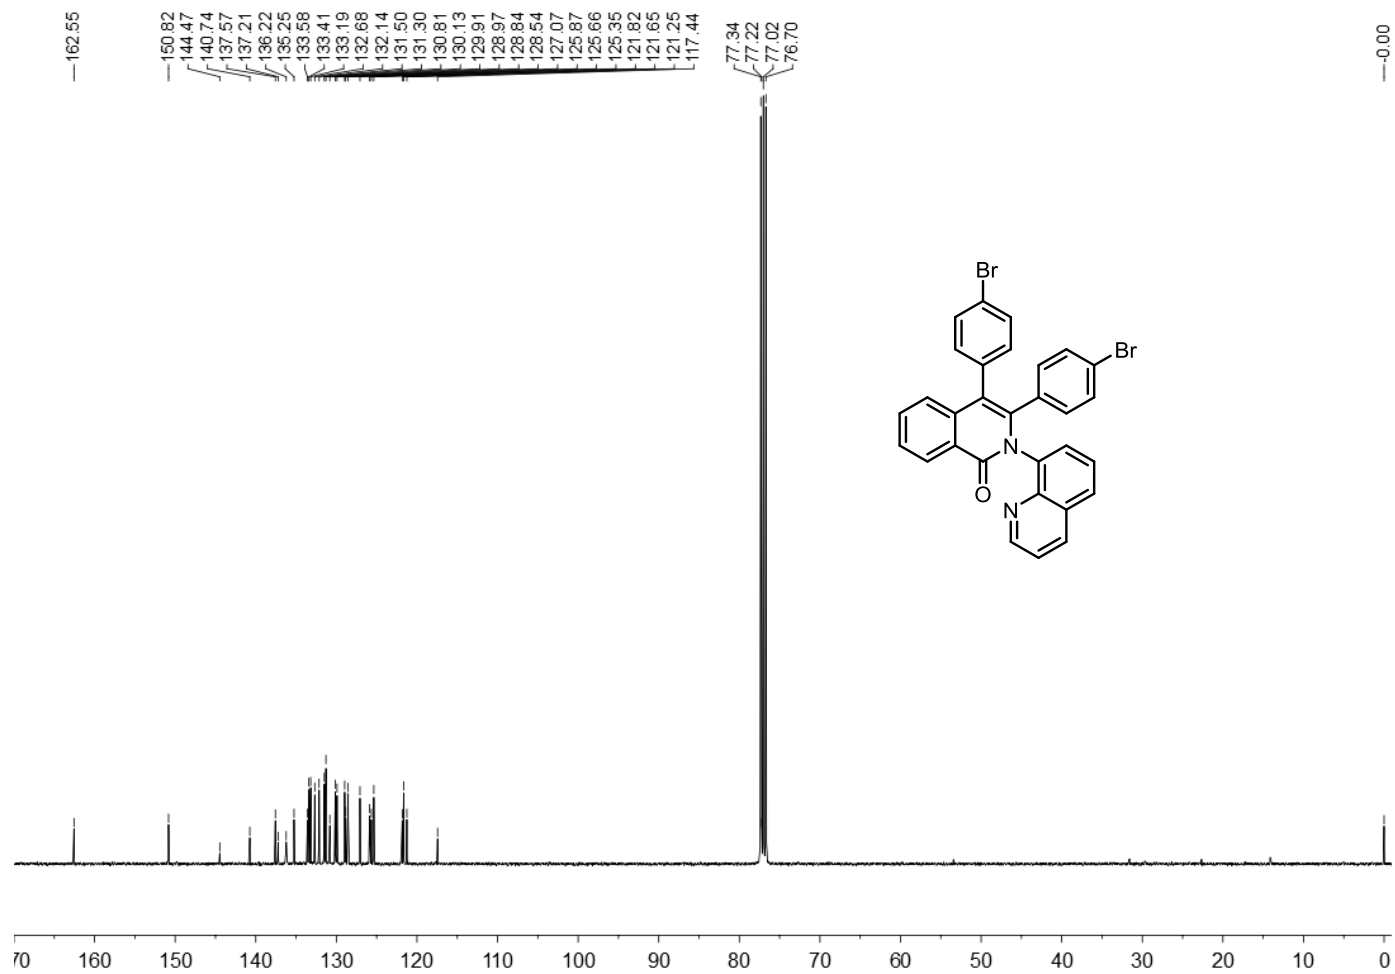

# Compound 3ag

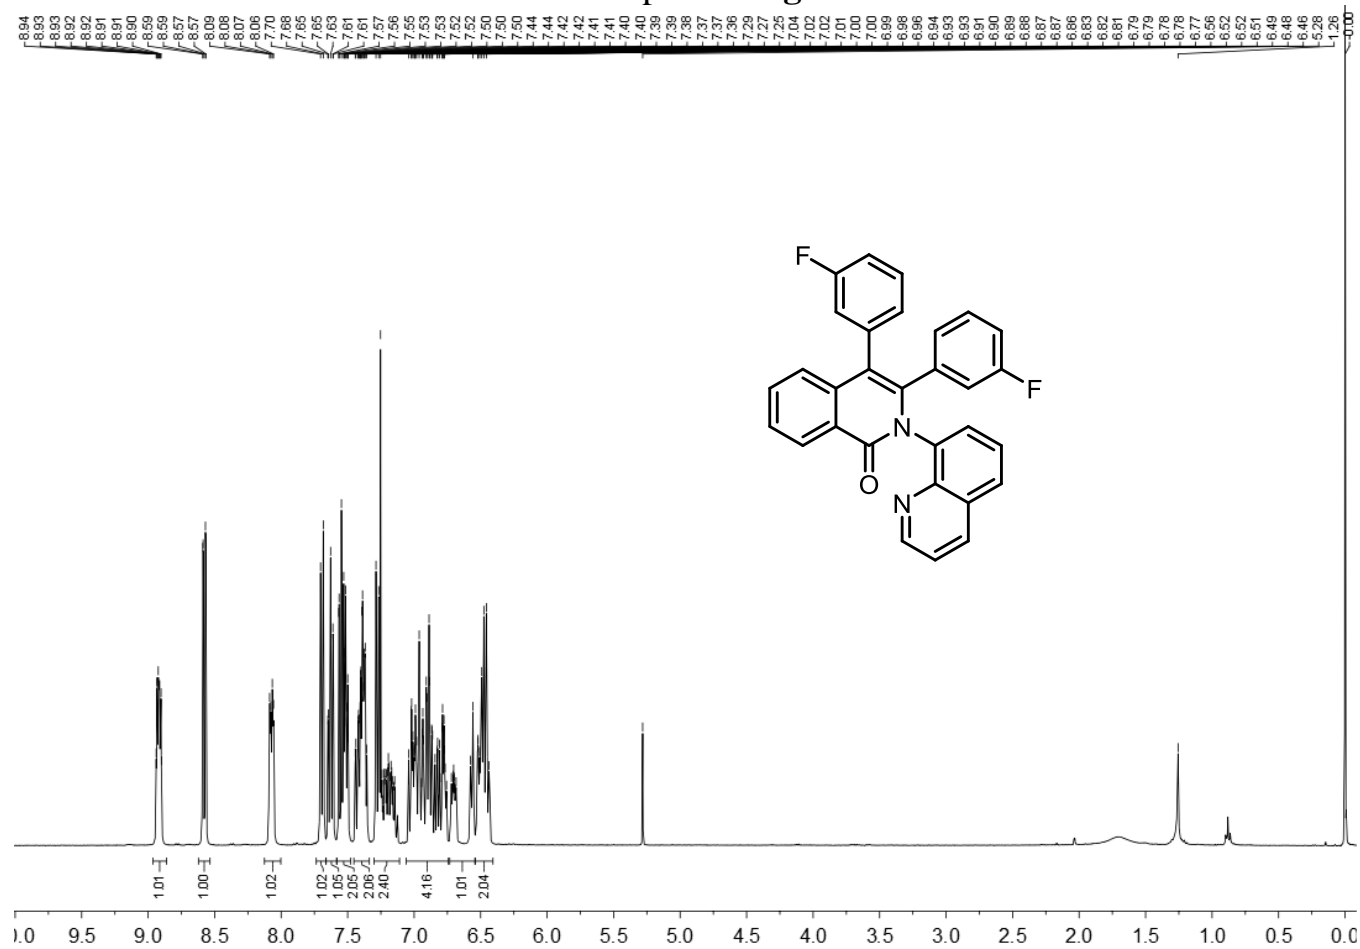

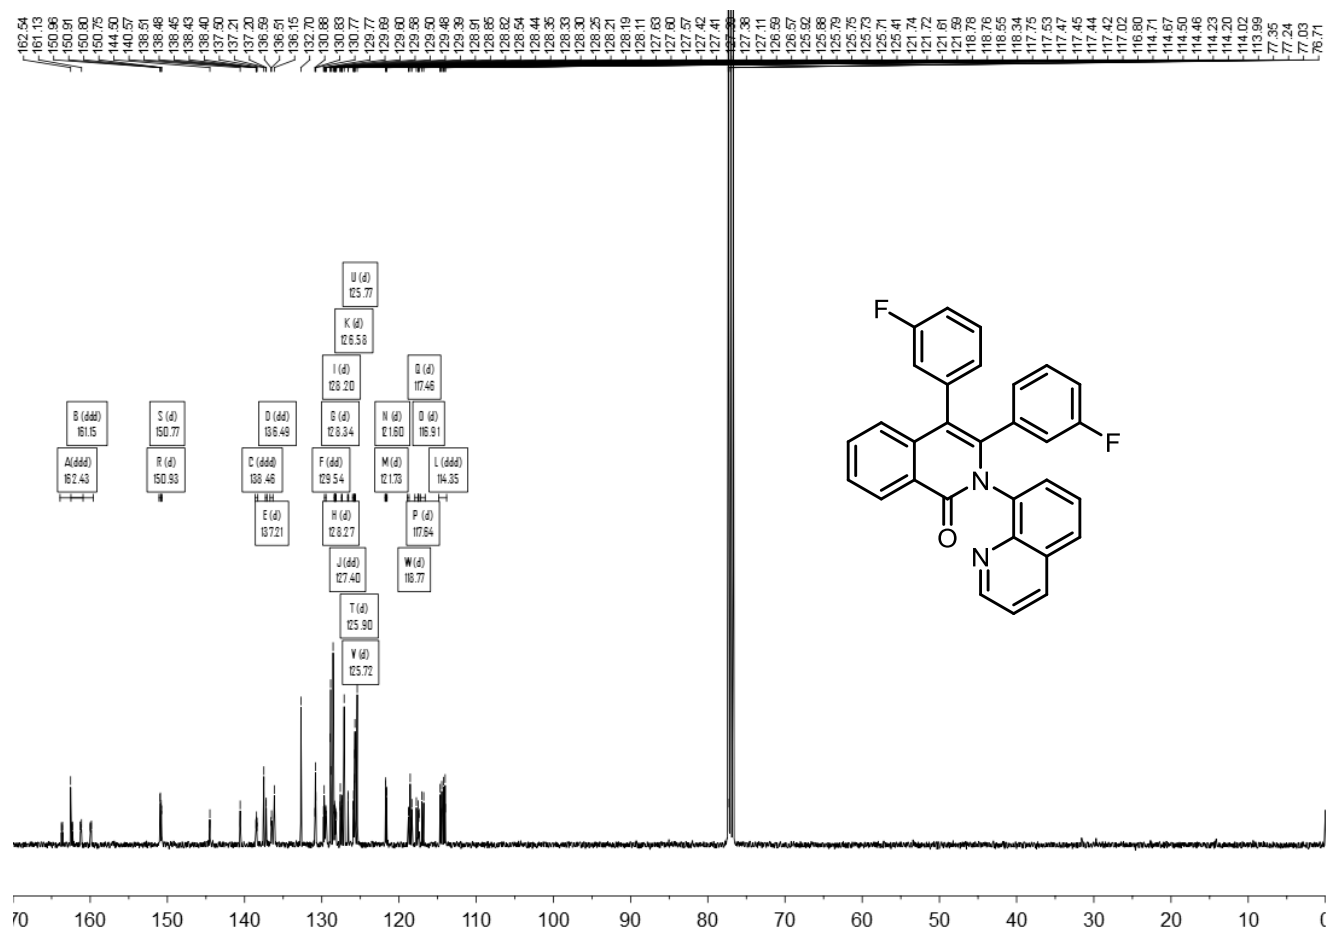

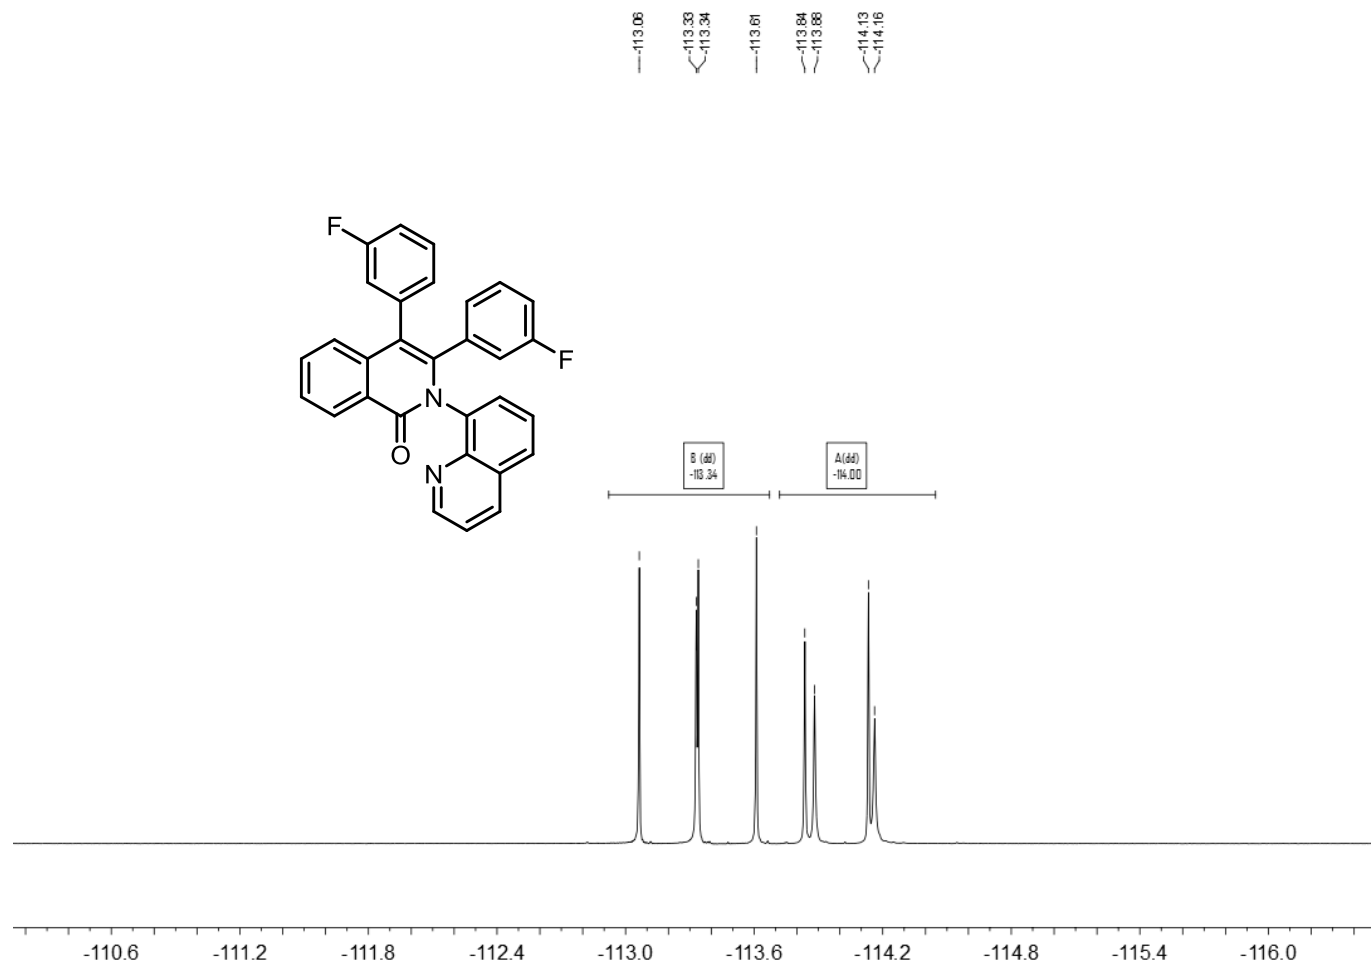



# Compound 3ah

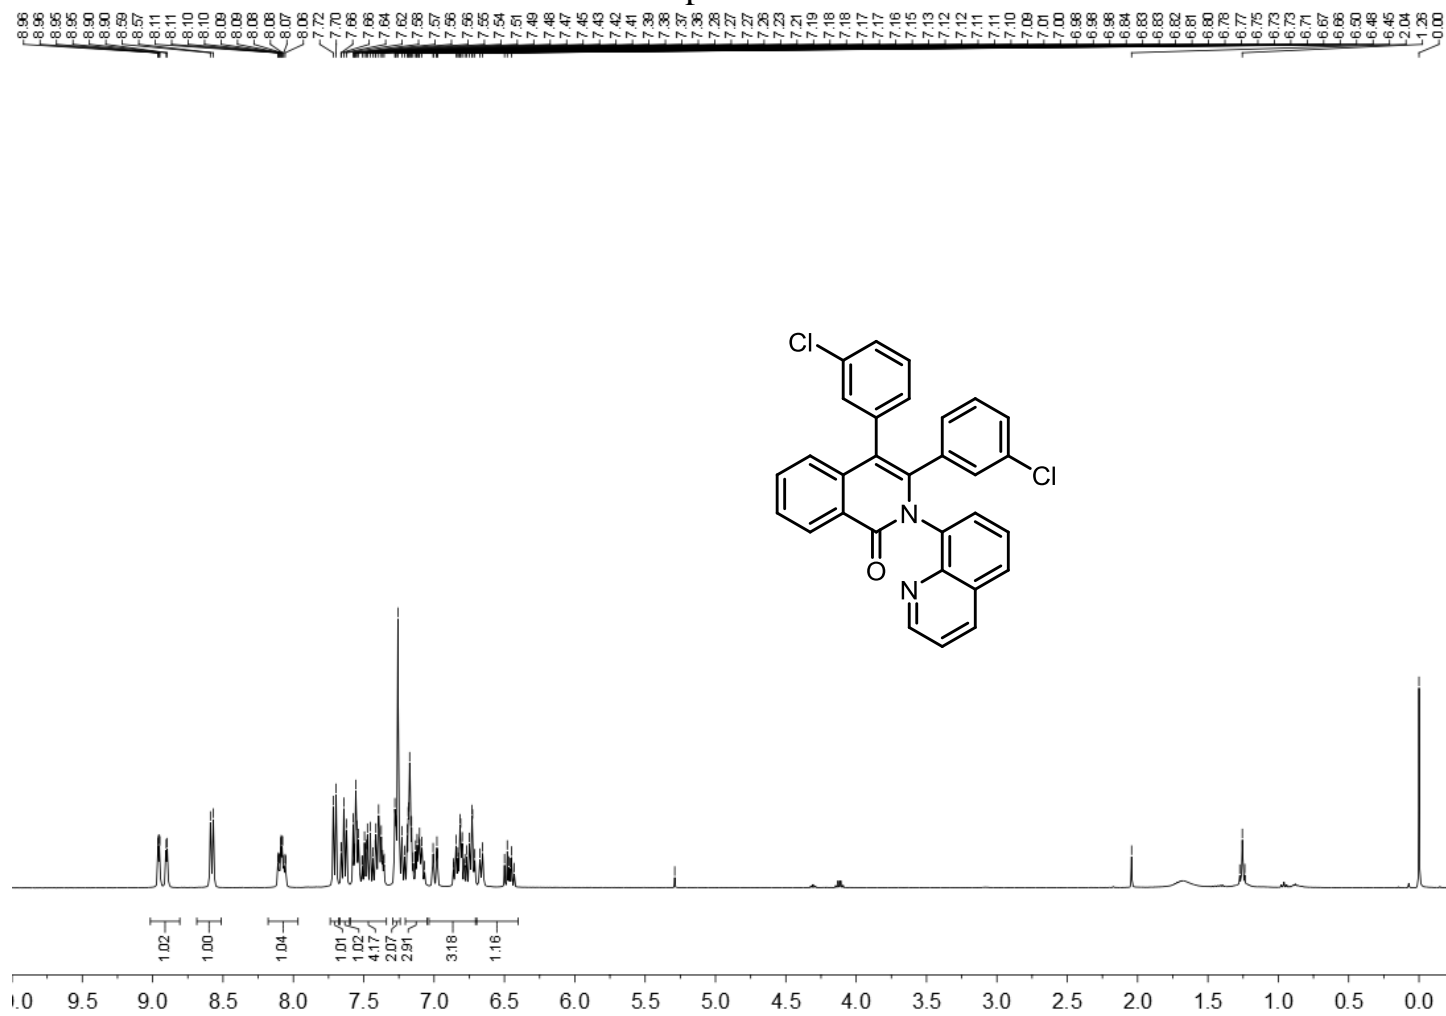

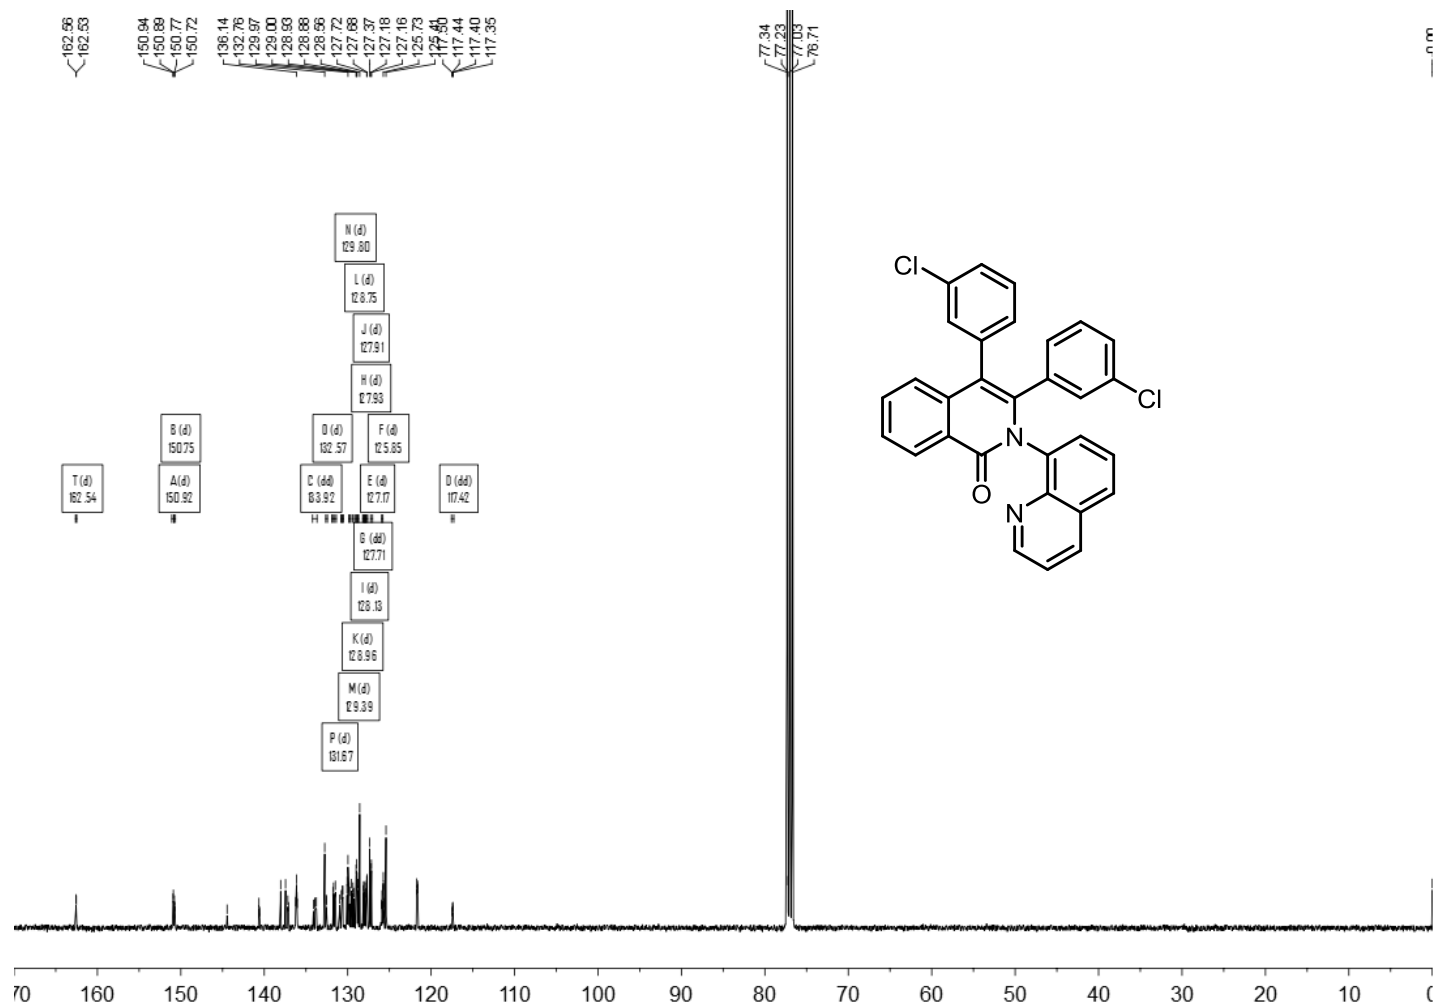

### Compound 3ai

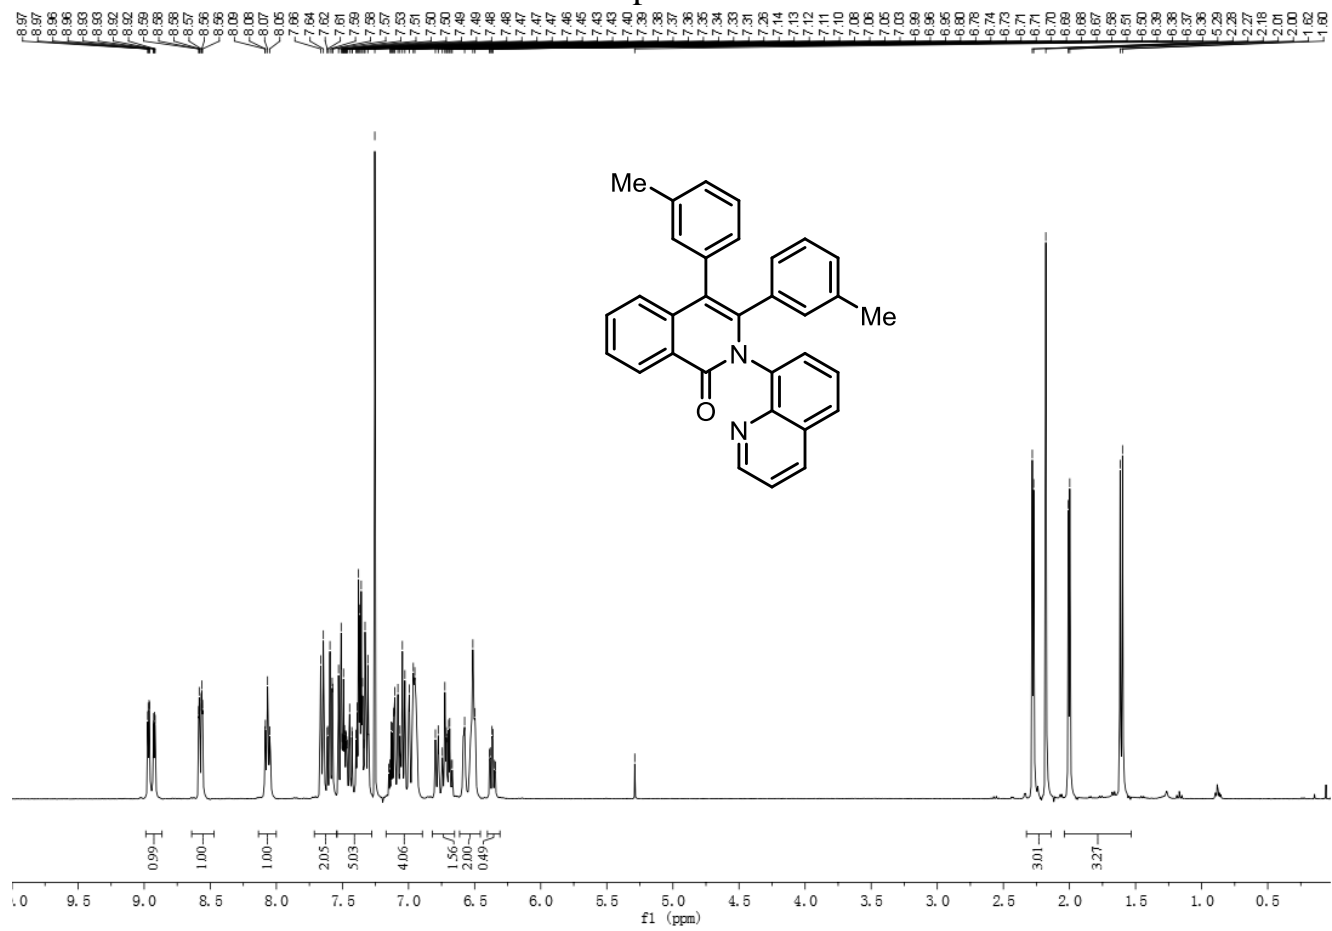

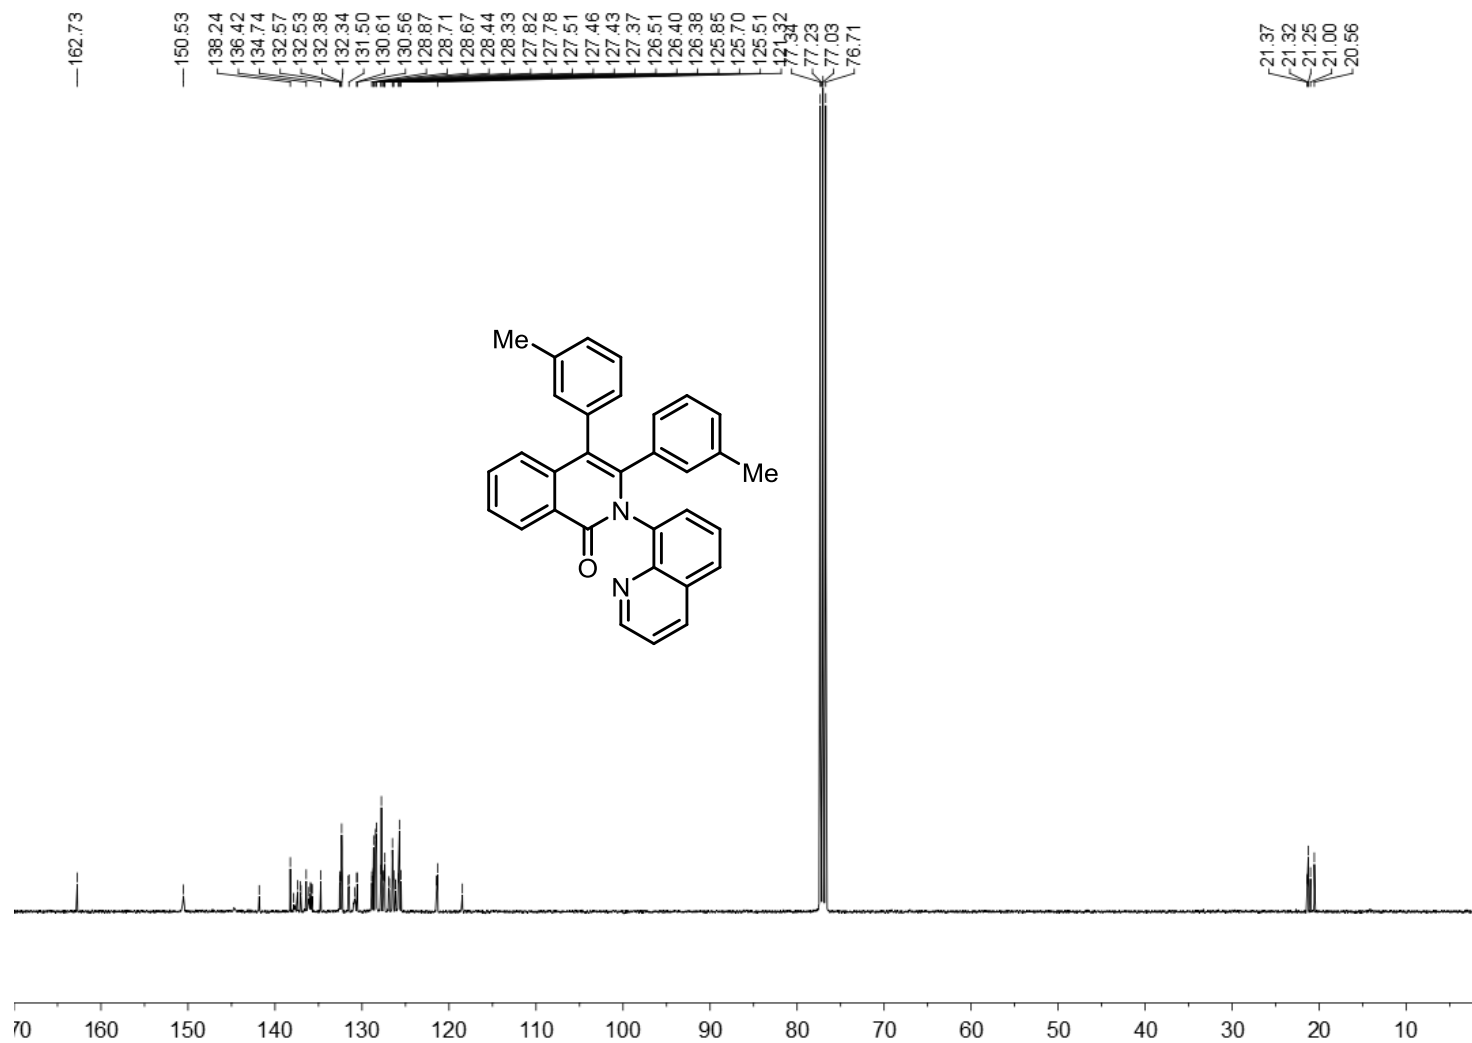

# Compound 3aj and 3ak

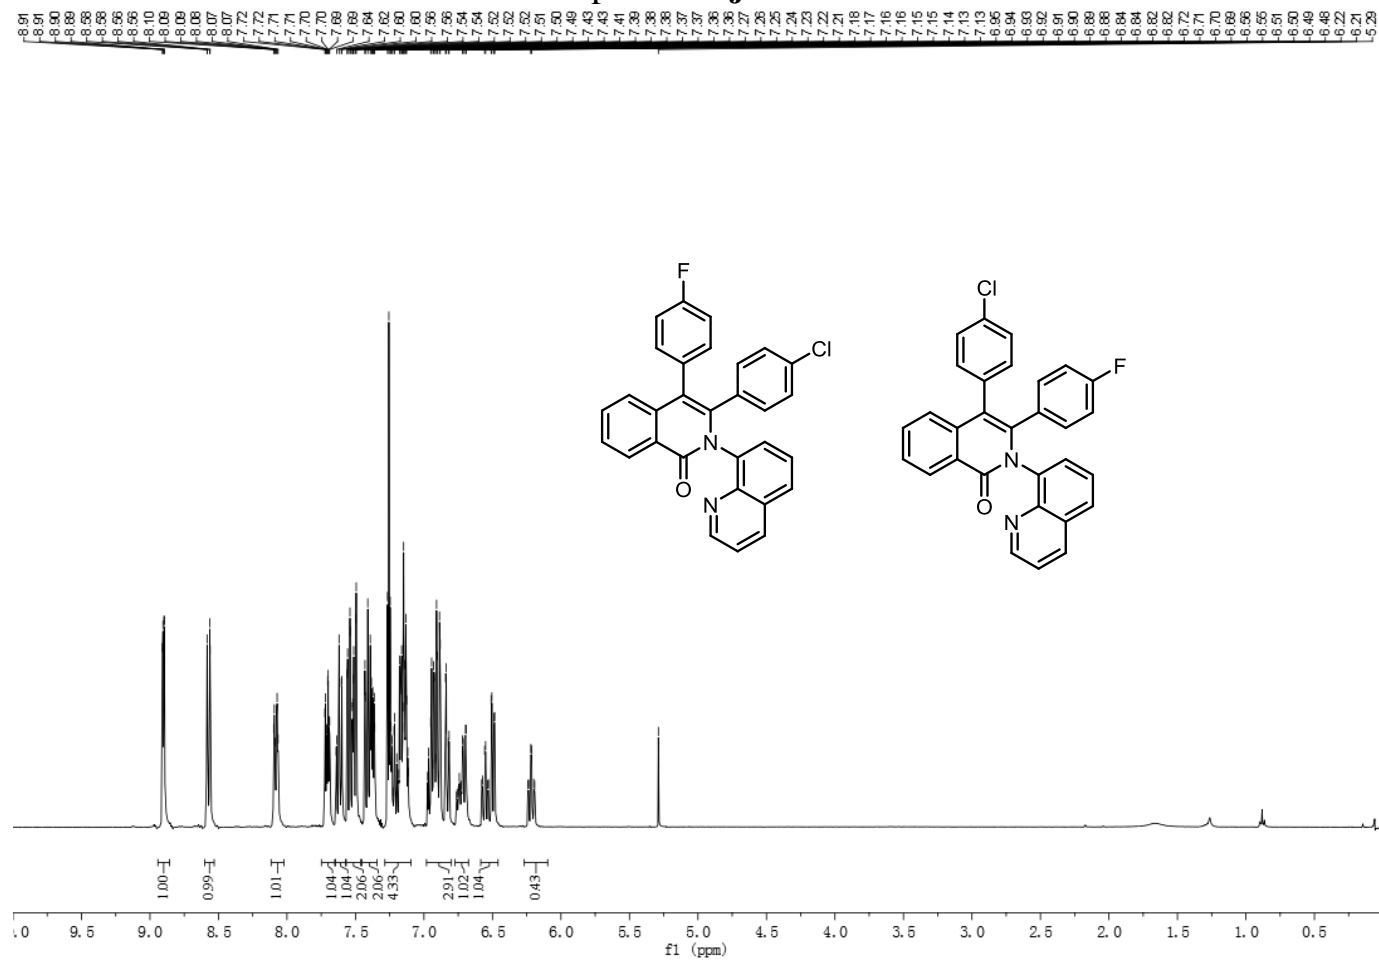

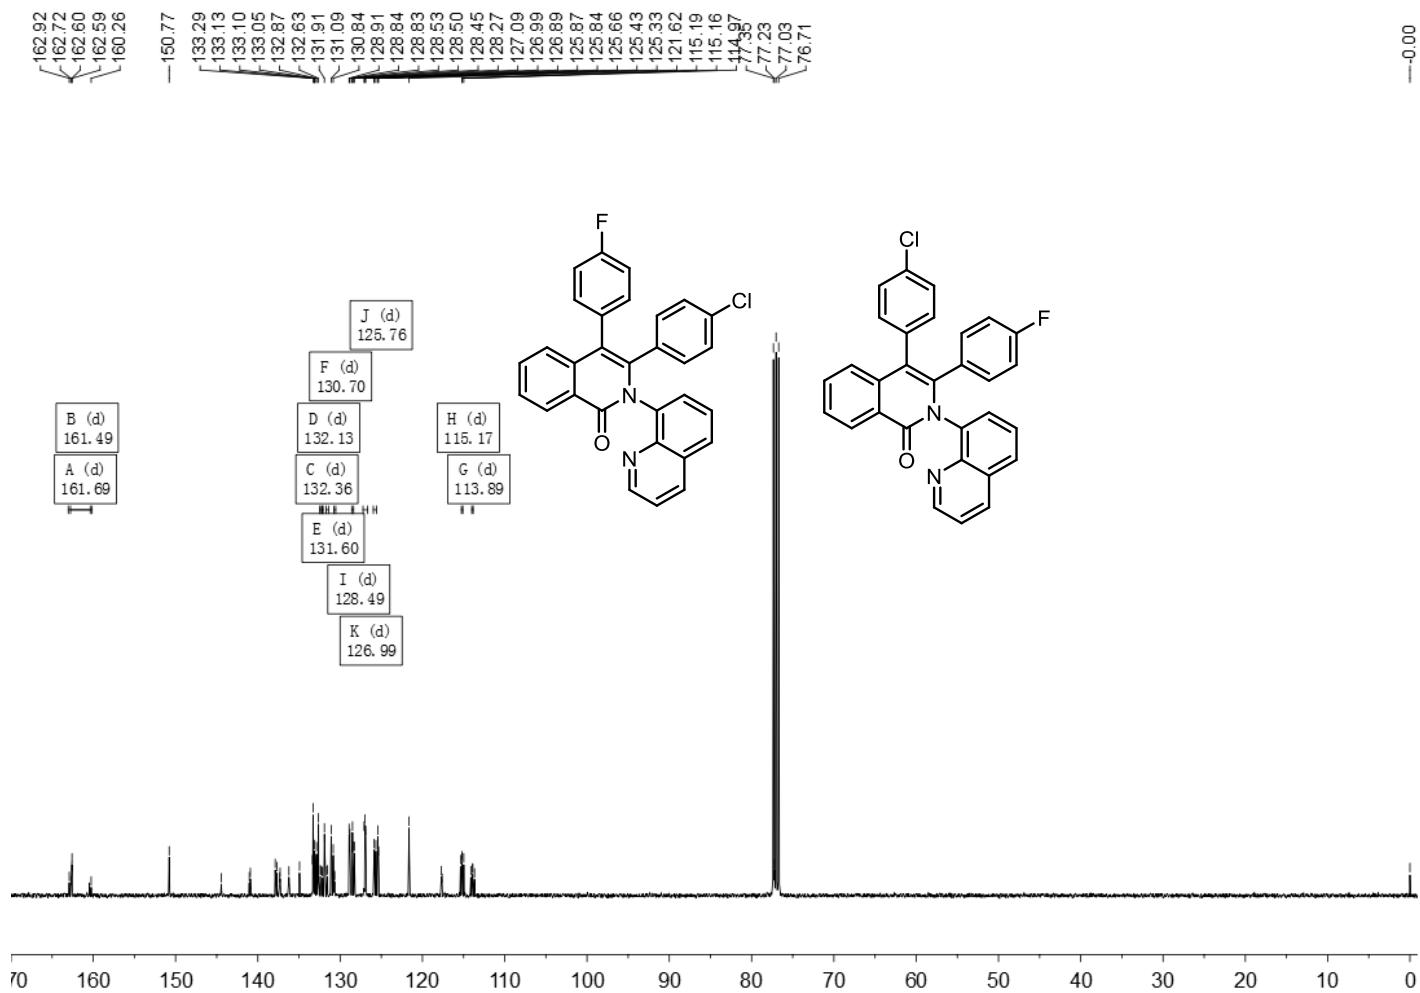

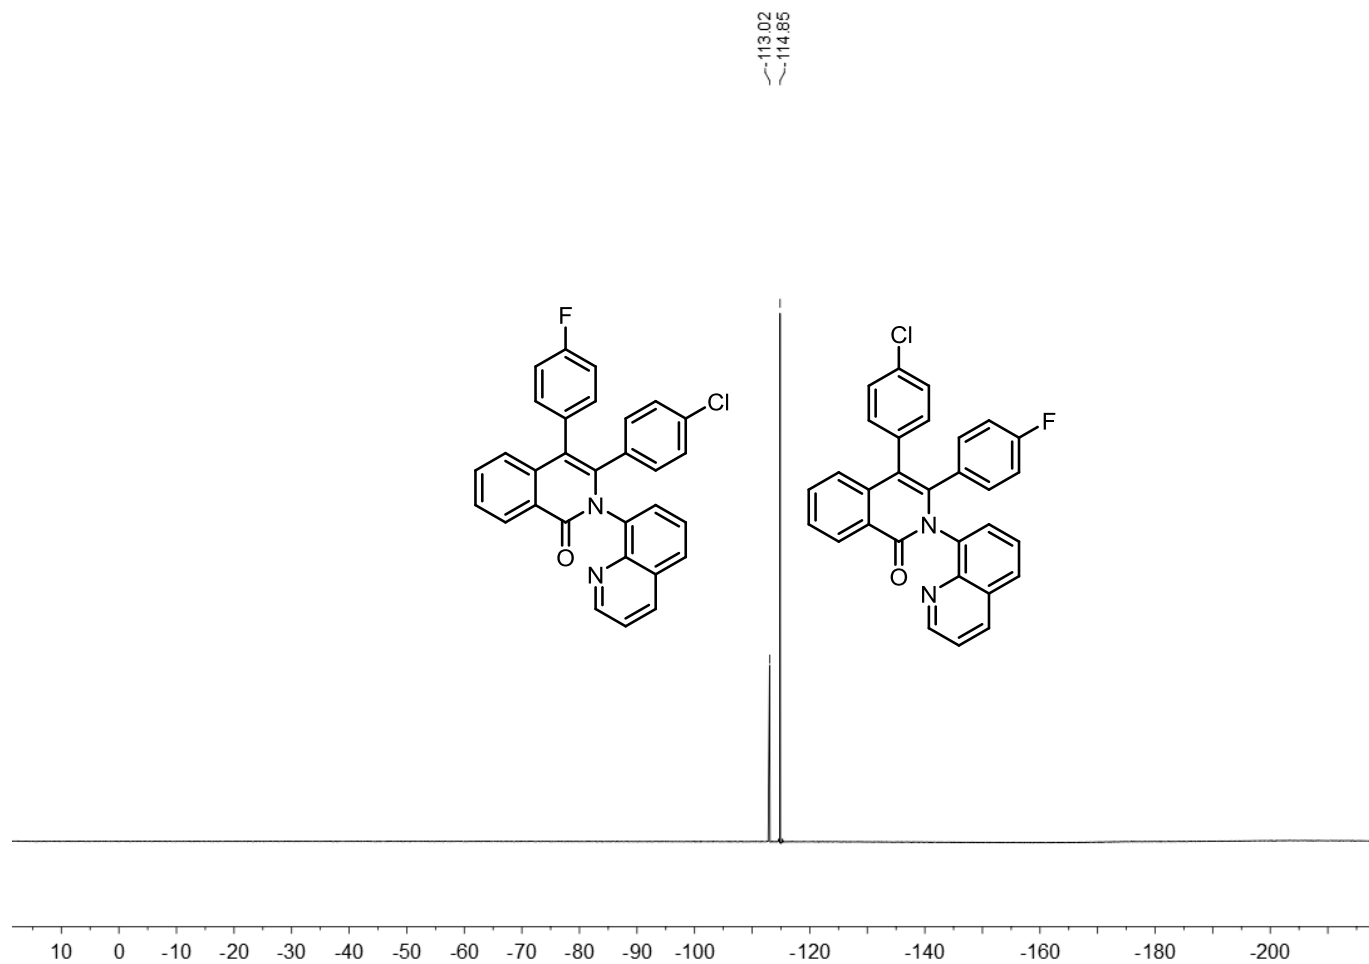

### Compound 3al and 3am

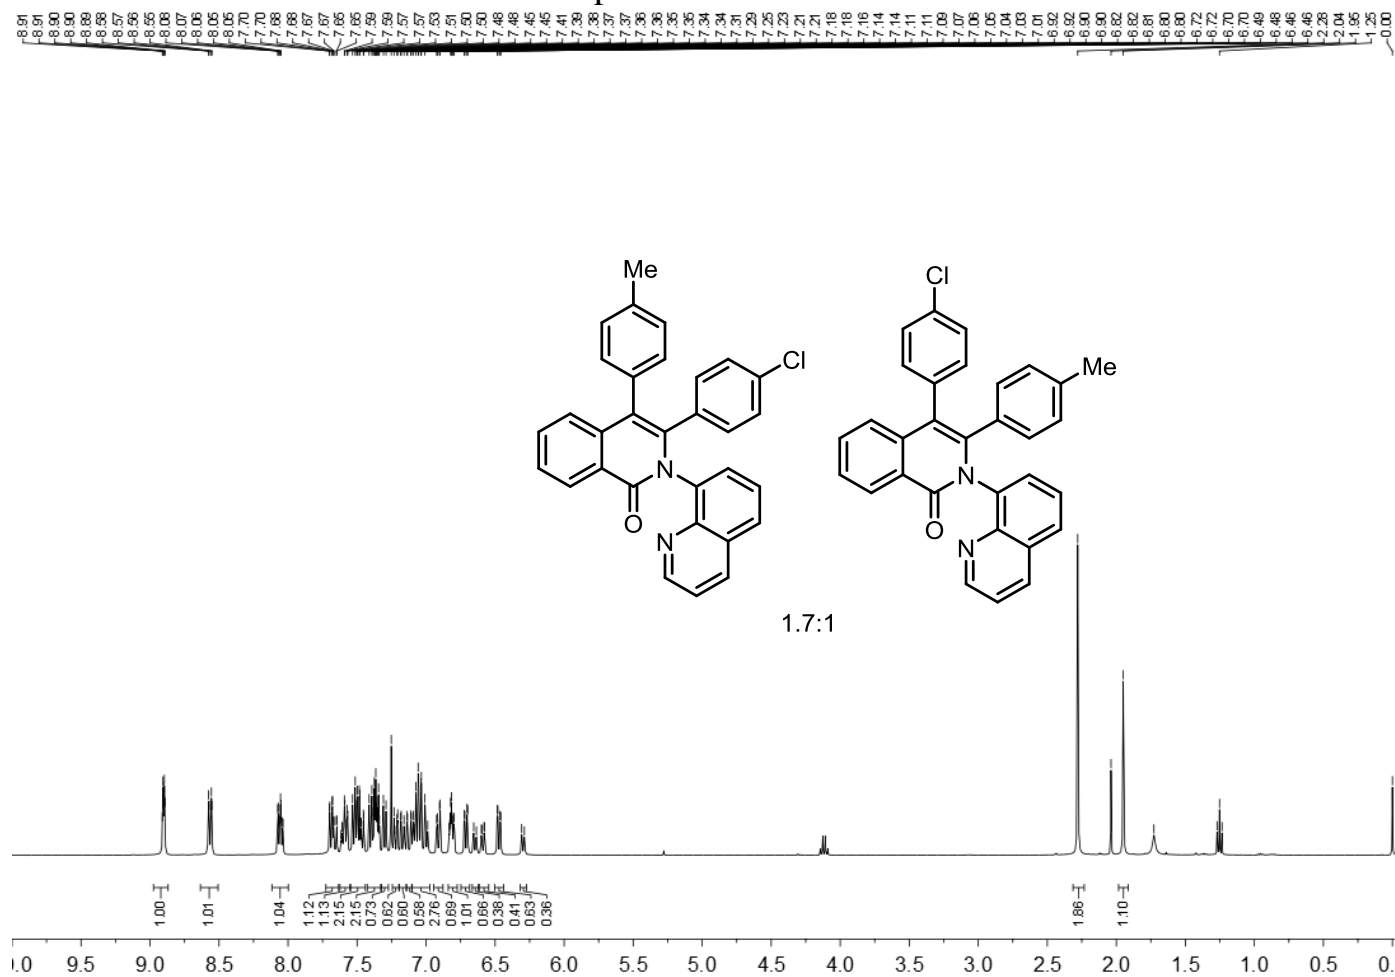



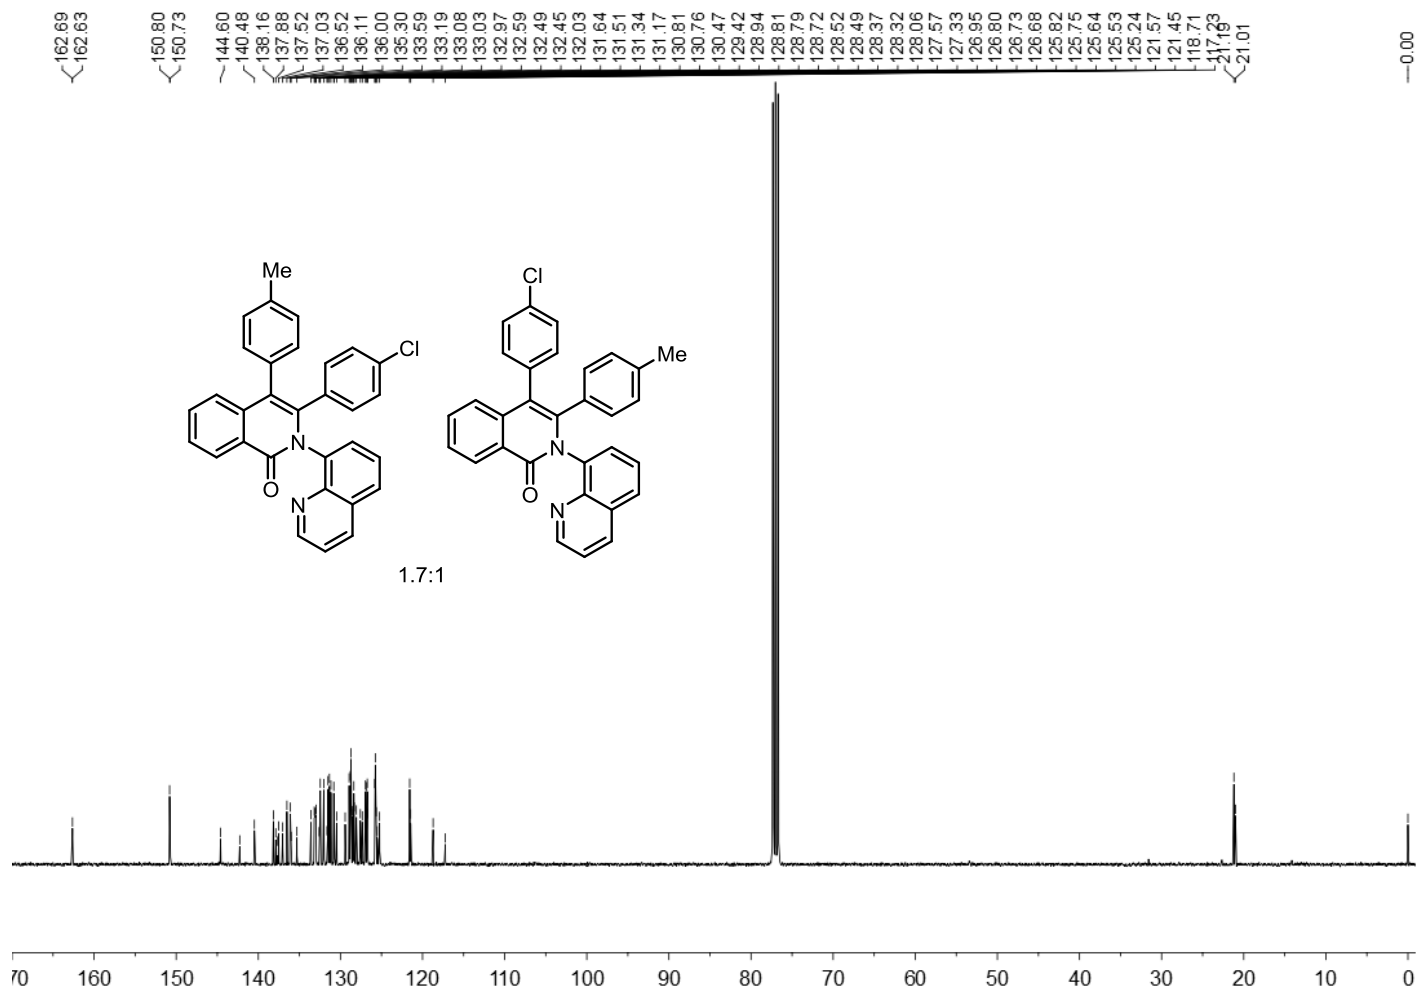

# Compound 3an

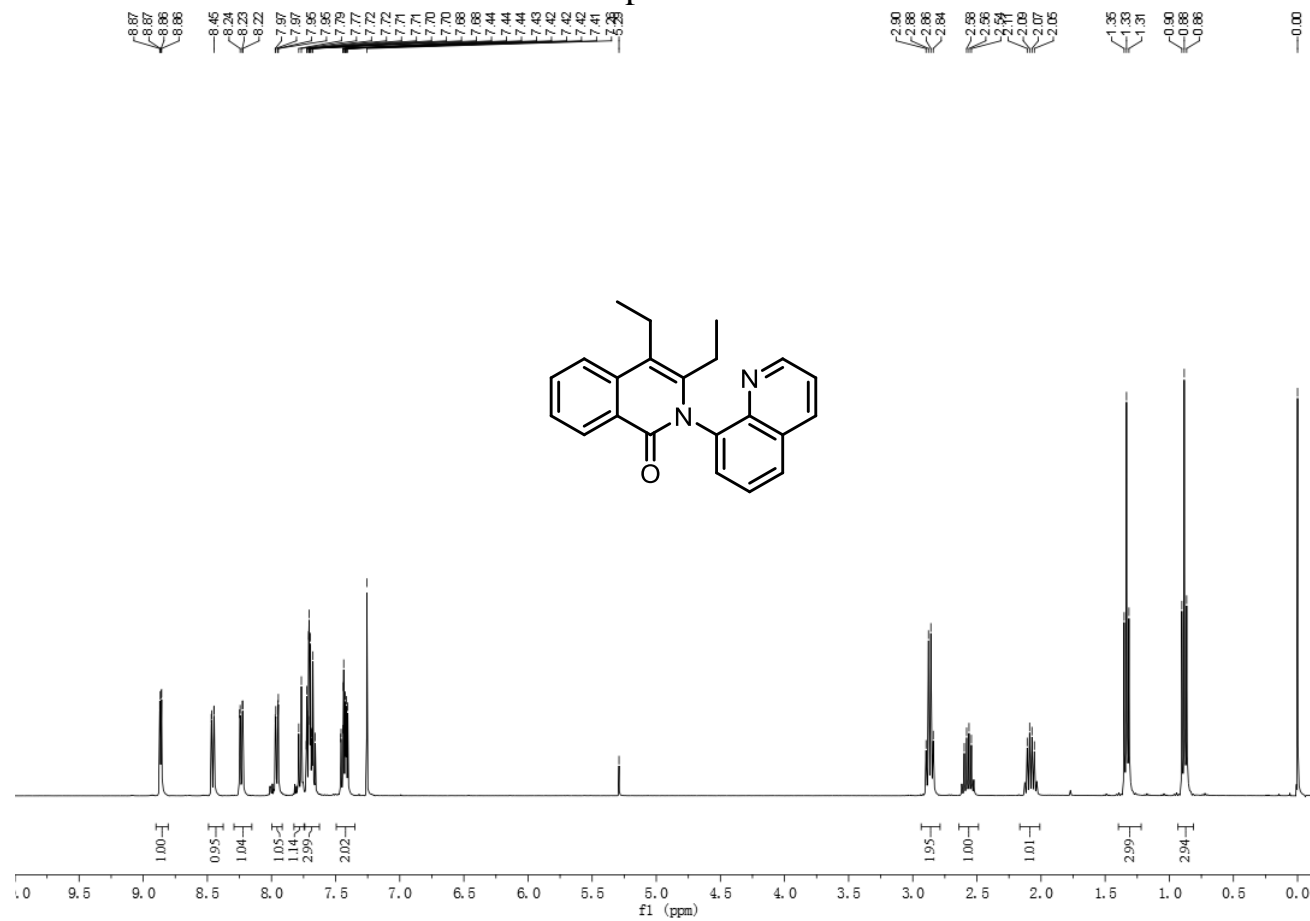

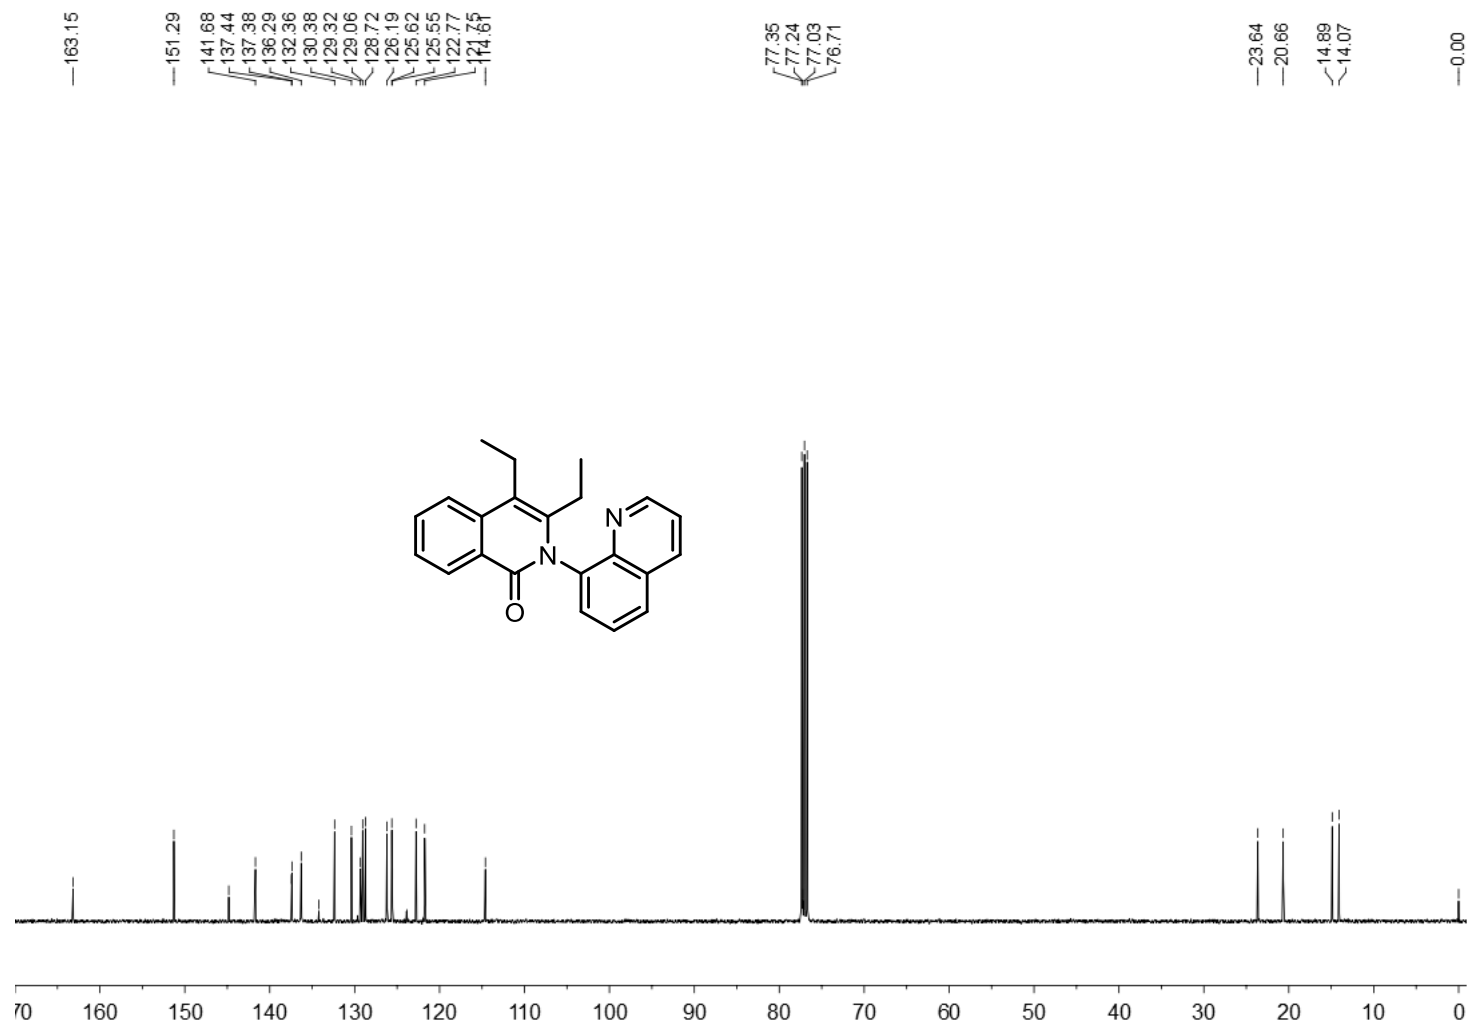

Supplement: d0ob01793k1.pdf [file d0ob01793k1.pdf]
